# Supplementary material for: Recognition and Degradation of Plant Cell Wall Polysaccharides by Two Human Gut Symbionts
Source: PubMed Central journal article supplement (PMC3243724; doi:10.1371/journal.pbio.1001221), 2011-12-20
Supplement: pbio.1001221.s010.pdf [file pbio.1001221.s010.pdf]

**Table S1. *B. thetaioaomicron* genes with altered expression *in vitro* during growth on plant and host glycans or *in vivo* in mono-associated gnotobiotic mice fed a plant glycan rich diet**

Genes are separated according to the Venn diagram sectors delineated in Figure S1. Values shown are the mean fold differences compared to expression during growth in MM-G; only fields with values  $\geq 10$ -fold are shown. Upregulated gene are shown in green; downregulated genes are shown in red. Empty cells indicate a fold-change values  $< 10$ .

| Gene                | Gene description                                                           | arabinan | arabino galactan | pectic galactan | homogal acturonan | rhamnogal acturonan I | rhamnogal acturonan II | pullulan | neutral O-glycans | $\alpha$ -mannan | chondroitin sulfate | heparin | hyaluronan | adult plant rich | adult simple sugar | suckling |
|---------------------|----------------------------------------------------------------------------|----------|------------------|-----------------|-------------------|-----------------------|------------------------|----------|-------------------|------------------|---------------------|---------|------------|------------------|--------------------|----------|
| <b>Upregulated:</b> |                                                                            |          |                  |                 |                   |                       |                        |          |                   |                  |                     |         |            |                  |                    |          |
| <b>Sector 1</b>     |                                                                            |          |                  |                 |                   |                       |                        |          |                   |                  |                     |         |            |                  |                    |          |
| BT0292              | hypothetical protein                                                       |          |                  |                 |                   |                       |                        |          |                   |                  |                     |         |            | 15.4             |                    | 42.0     |
| BT0294              | hypothetical protein                                                       |          |                  |                 |                   |                       |                        |          |                   |                  |                     |         |            | 94.1             | 176.2              | 43.7     |
| BT0317              | susC-like                                                                  |          |                  |                 |                   |                       |                        |          |                   |                  |                     |         |            | 116.3            | 223.3              | 39.0     |
| BT0318              | susD-like                                                                  |          |                  |                 |                   |                       |                        |          |                   |                  |                     |         |            | 18.7             | 25.0               |          |
| BT0483              | susC-like                                                                  |          |                  |                 |                   |                       |                        |          |                   |                  |                     |         |            | 14.5             | 12.6               |          |
| BT0484              | susD-like                                                                  |          |                  |                 |                   |                       |                        |          |                   |                  |                     |         |            | 11.7             | 15.3               | 48.7     |
| BT0683              | Glycoside hydrolase family 97                                              |          | 10.7             |                 |                   | 19.2                  |                        |          |                   | 16.9             |                     | 15.2    |            | 16.0             |                    |          |
| BT0693              | hypothetical protein                                                       |          |                  |                 |                   |                       |                        |          |                   |                  |                     |         |            | 59.2             | 53.5               | 40.2     |
| BT0722              | conserved hypothetical protein, putative surface protein, function unknown |          |                  |                 |                   |                       |                        |          |                   |                  |                     |         |            | 10.4             |                    |          |
| BT0754              | susC-like                                                                  |          |                  |                 |                   |                       |                        |          |                   |                  |                     |         |            | 13.8             |                    |          |
| BT0763              | hypothetical protein                                                       |          |                  |                 |                   |                       |                        |          |                   |                  |                     |         |            | 23.9             |                    |          |
| BT0764              | hypothetical protein                                                       |          |                  |                 |                   |                       |                        |          |                   |                  |                     |         |            | 18.9             |                    |          |
| BT0765              | putative protease                                                          |          |                  |                 |                   |                       |                        |          |                   |                  |                     |         |            | 23.3             | 204.8              | 116.7    |
| BT0865              | Carbohydrate binding module family 32                                      |          |                  |                 |                   |                       |                        |          |                   |                  |                     |         |            | 42.5             | 394.7              | 246.9    |
| BT0866              | susD-like                                                                  |          |                  |                 |                   |                       |                        |          |                   |                  |                     |         |            | 21.4             | 282.1              | 145.4    |
| BT0867              | susC-like                                                                  |          |                  |                 |                   |                       |                        |          |                   |                  |                     |         |            | 10.1             | 15.1               |          |
| BT0901              | putative universal stress protein UspA                                     |          |                  |                 |                   |                       |                        |          |                   |                  |                     |         |            | 19.4             |                    |          |
| BT1008              | xylanase                                                                   |          |                  |                 |                   |                       |                        |          |                   |                  |                     |         |            | 66.0             |                    |          |
| BT1009              | dihydroorotate dehydrogenase                                               |          |                  |                 |                   |                       |                        |          | 74.9              |                  |                     |         | 14.0       | 139.9            | 232.7              | 457.1    |
| BT1034              | putative signal transducer                                                 |          |                  |                 |                   |                       |                        |          | 17.7              |                  |                     |         |            | 75.1             | 233.7              | 104.2    |
| BT1047              | susD-like                                                                  |          |                  |                 |                   |                       |                        |          |                   |                  |                     |         |            | 21.1             | 16.1               |          |
| BT1072              | hypothetical protein                                                       |          |                  |                 |                   |                       |                        |          |                   |                  |                     |         |            | 17.0             | 23.0               |          |
| BT1073              | hypothetical protein                                                       |          |                  |                 |                   |                       |                        |          |                   |                  |                     |         |            | 21.9             | 21.9               |          |
| BT1074              | hypothetical protein                                                       |          |                  |                 |                   |                       |                        |          |                   |                  |                     |         |            | 18.2             | 24.1               |          |
| BT1196              | pyruvate carboxylase subunit B)                                            |          |                  |                 |                   |                       |                        |          |                   |                  |                     |         |            | 15.7             |                    | 14.8     |
| BT1280              | susC-like                                                                  |          |                  |                 |                   |                       |                        |          | 22.7              |                  |                     |         | 13.0       | 176.7            | 12.5               | 18.8     |
| BT1283              | hypothetical protein                                                       |          |                  |                 |                   |                       |                        |          |                   |                  |                     |         |            | 17.2             | 78.5               | 20.9     |
| BT1287              | hypothetical protein                                                       |          |                  |                 |                   |                       |                        |          |                   |                  |                     |         |            | 22.9             | 22.9               | 40.0     |
| BT1486              | hypothetical protein                                                       |          |                  |                 |                   |                       |                        |          |                   |                  |                     |         |            | 41.0             | 33.1               | 59.6     |
| BT1487              | hypothetical protein                                                       |          |                  |                 |                   |                       |                        |          |                   |                  |                     |         |            | 43.7             | 37.2               | 82.3     |
| BT1488              | hypothetical protein                                                       |          |                  |                 |                   |                       |                        |          |                   |                  |                     |         |            | 26.2             | 16.8               | 26.1     |
| BT1489              | vitamin B12 receptor, outer membrane                                       |          |                  |                 |                   |                       |                        |          |                   |                  |                     |         |            | 16.3             | 13.4               |          |
| BT1492              | tyrosine phenol-lyase                                                      |          |                  |                 |                   |                       |                        |          |                   |                  |                     |         |            | 68.1             | 10.4               |          |
| BT1530              | putative outer membrane protein OprM precursor                             |          |                  |                 |                   |                       |                        |          |                   |                  |                     |         |            | 91.7             |                    |          |
| BT1533              | hypothetical protein                                                       |          |                  |                 |                   |                       |                        |          |                   |                  |                     |         |            | 12.0             | 93.8               | 38.9     |
| BT1619              | susC-like                                                                  |          |                  |                 |                   |                       |                        |          |                   |                  |                     |         |            | 11.5             | 72.8               | 39.2     |
| BT1653              | hypothetical protein                                                       |          |                  |                 |                   |                       |                        |          |                   |                  |                     |         |            | 17.1             | 67.5               | 124.6    |
| BT1655              | hypothetical protein                                                       |          |                  |                 |                   |                       |                        |          |                   |                  |                     |         |            | 10.7             | 65.5               | 49.4     |
| BT1656              | putative transcriptional regulator                                         |          |                  |                 |                   |                       |                        |          |                   |                  |                     |         |            | 14.3             | 54.0               | 152.1    |
| BT1718              | putative 2-aminoethylphosphonate pyruvate aminotransferase                 |          |                  |                 |                   |                       |                        |          |                   |                  |                     |         |            | 10.6             |                    |          |
| BT1904              | transcriptional regulator, AraC-type                                       |          |                  |                 |                   |                       |                        |          |                   |                  |                     |         |            | 31.9             | 60.5               | 57.3     |
| BT1950              | Fe3+ ABC transporter, ATP-binding protein                                  |          |                  |                 |                   |                       |                        |          |                   |                  |                     |         |            | 29.2             | 27.5               | 25.0     |
| BT1951              | Fe3+ ABC transporter, permease                                             |          |                  |                 |                   |                       |                        |          |                   |                  |                     |         |            | 48.3             | 68.7               | 51.1     |
| BT1952              | Fe3+ ABC transporter, periplasmic iron-binding protein                     |          |                  |                 |                   |                       |                        |          |                   |                  |                     |         |            | 40.1             | 44.7               | 44.3     |
| BT1953              | putative TonB-linked outer membrane receptor                               |          |                  |                 |                   |                       |                        |          |                   |                  |                     |         |            | 31.0             | 53.2               | 35.9     |
| BT1954              | putative surface layer protein                                             |          |                  |                 |                   |                       |                        |          |                   |                  |                     |         |            | 48.0             | 58.7               | 52.9     |
| BT1955              | putative cell wall biogenesis protein                                      |          |                  |                 |                   |                       |                        |          |                   |                  |                     |         |            | 36.0             | 102.3              | 77.0     |
| BT1956              | putative cell surface protein                                              |          |                  |                 |                   |                       |                        |          |                   |                  |                     |         |            | 21.4             | 24.3               |          |
| BT1973              | NAD-specific glutamate dehydrogenase                                       |          |                  |                 |                   |                       |                        |          |                   |                  |                     |         |            | 12.5             |                    | 11.0     |
| BT2038              | cation efflux system protein                                               |          |                  |                 |                   |                       |                        |          |                   |                  |                     |         |            | 12.9             |                    |          |
| BT2040              | hypothetical protein                                                       |          |                  |                 |                   |                       |                        |          |                   |                  |                     |         |            | 16.2             |                    |          |
| BT2087              | hypothetical protein                                                       |          |                  |                 |                   |                       |                        |          |                   |                  |                     |         |            | 17.2             | 14.2               | 12.4     |
| BT2094              | TonB-dependent receptor                                                    |          |                  |                 |                   |                       |                        |          |                   |                  |                     |         |            | 12.6             | 11.9               |          |

|        |                                                                 |      |      |      |       |       |       |
|--------|-----------------------------------------------------------------|------|------|------|-------|-------|-------|
| BT2383 | RNA polymerase ECF-type sigma factor                            |      |      |      | 11.3  | 49.7  | 53.2  |
| BT2395 | hypothetical protein                                            |      |      |      | 19.9  | 19.8  | 11.9  |
| BT2404 | L-asparaginase I                                                |      |      |      | 17.2  | 21.3  |       |
| BT2551 | phosphate butyryltransferase                                    |      |      |      | 20.8  | 19.1  |       |
| BT2552 | putative butyrate kinase                                        |      |      |      | 18.4  | 69.1  | 22.8  |
| BT2569 | RNA polymerase ECF-type sigma factor                            |      |      |      | 29.3  | 65.7  | 14.9  |
| BT2690 | histidine ammonia-lyase                                         |      |      |      | 14.8  | 30.5  | 12.2  |
| BT2691 | methenyltetrahydrofolate cyclohydrolase                         |      |      |      | 35.1  | 36.3  |       |
| BT2692 | imidazolonepropionase                                           |      |      |      | 31.0  | 63.9  | 19.6  |
| BT2693 | formiminotransferase-cyclodeaminase                             |      |      |      | 23.4  | 28.8  |       |
| BT2694 | putative urocanate hydratase                                    |      |      |      | 10.6  | 13.9  |       |
| BT2762 | TonB                                                            |      |      |      | 40.3  | 25.4  |       |
| BT2778 | RNA polymerase ECF-type sigma factor                            |      |      |      | 96.0  | 47.3  |       |
| BT2779 | 3-demethylubiquinone-9 3-methyltransferase                      |      |      |      | 24.5  | 22.4  |       |
| BT2784 | hypothetical protein                                            |      |      |      | 13.4  | 16.2  |       |
| BT2785 | hypothetical protein                                            |      |      |      | 12.8  | 35.6  | 62.1  |
| BT2804 | ribokinase                                                      |      |      |      | 34.4  |       |       |
| BT2893 | susD-like                                                       |      |      |      | 14.2  |       |       |
| BT2894 | susC-like                                                       | 34.8 | 10.4 | 12.6 | 313.2 |       |       |
| BT2896 | hypothetical protein                                            |      |      |      | 11.4  |       |       |
| BT2899 | hypothetical protein                                            |      |      |      | 21.5  |       |       |
| BT3043 | Glycoside hydrolase family 30                                   |      |      |      | 16.6  |       |       |
| BT3048 | hypothetical protein                                            |      |      |      | 14.4  |       |       |
| BT3188 | hypothetical protein                                            |      |      |      | 11.4  |       |       |
| BT3189 | hypothetical protein                                            |      |      |      | 10.1  |       |       |
| BT3190 | putative RNA polymerase ECF-type sigma factor                   |      |      |      | 164.0 | 77.6  | 58.0  |
| BT3259 | hypothetical protein                                            |      |      |      | 18.9  | 37.6  |       |
| BT3436 | hypothetical protein                                            |      |      |      | 25.1  | 53.4  |       |
| BT3437 | hypothetical protein                                            |      |      |      | 27.3  | 138.7 |       |
| BT3438 | hypothetical protein                                            |      |      |      | 139.3 | 201.8 |       |
| BT3441 | hypothetical protein                                            |      |      |      | 18.3  | 16.1  |       |
| BT3475 | susC-like                                                       |      |      |      | 10.1  |       |       |
| BT3525 | hypothetical protein                                            |      |      |      | 15.3  |       |       |
| BT3650 | hypothetical protein                                            |      |      |      | 50.3  |       |       |
| BT3651 | hypothetical protein                                            |      |      |      | 70.4  |       |       |
| BT3652 | hypothetical protein                                            |      |      |      | 89.6  |       |       |
| BT3653 | hypothetical protein                                            |      |      |      | 10.3  |       |       |
| BT3769 | hypothetical protein                                            |      |      |      | 16.8  |       |       |
| BT3822 | hypothetical protein                                            |      |      |      | 10.5  |       |       |
| BT3874 | hypothetical protein                                            |      |      |      | 45.9  | 104.8 | 125.0 |
| BT3983 | susC-like                                                       |      |      |      | 60.0  | 90.7  | 102.1 |
| BT3984 | susD-like                                                       |      |      |      | 42.3  | 223.8 | 203.4 |
| BT3985 | hypothetical protein                                            |      |      |      | 102.8 | 243.8 | 270.0 |
| BT3986 | putative patatin-like protein                                   |      |      |      | 54.9  | 133.1 | 147.5 |
| BT3987 | Glycoside hydrolase family 18                                   |      |      |      | 43.3  | 103.9 | 136.4 |
| BT3988 | putative peptidoglycan bound protein                            |      |      |      | 19.1  | 47.8  | 42.4  |
| BT4038 | susD-like                                                       |      |      |      | 17.0  | 32.2  | 23.2  |
| BT4040 | Carbohydrate binding module family 32                           |      |      |      | 16.3  | 50.4  | 10.4  |
| BT4356 | putative anti-sigma factor                                      |      |      |      | 61.8  | 400.8 | 47.4  |
| BT4358 | susD-like                                                       |      |      |      | 14.6  |       | 18.5  |
| BT4404 | susC-like                                                       |      |      |      | 27.1  | 33.1  | 43.0  |
| BT4405 | susD-like                                                       |      |      |      | 18.3  | 12.0  | 16.2  |
| BT4406 | hypothetical protein                                            |      |      |      | 12.4  | 17.4  |       |
| BT4465 | conserved hypothetical protein, putative outer membrane protein |      |      |      | 30.9  | 13.1  |       |
| BT4647 | RNA polymerase ECF-type sigma factor                            |      |      |      | 17.2  |       |       |
| BT4649 | hypothetical protein                                            |      |      |      | 18.5  | 17.7  | 11.4  |
| BT4689 | Glycoside hydrolase family 13                                   |      |      |      | 20.6  |       |       |
| BT4708 | susD-like                                                       |      |      |      | 25.4  |       |       |
| BT4709 | Glycoside hydrolase family 18                                   |      |      |      | 18.5  |       |       |
| BT4710 | hypothetical protein                                            |      |      |      | 21.1  |       |       |
| BT4711 | hypothetical protein                                            |      |      |      | 13.3  |       | 11.5  |
| BT4712 | hypothetical protein                                            |      |      |      |       |       |       |

## Sector 2

|        |                                                          |        |       |       |       |       |       |      |      |       |       |       |
|--------|----------------------------------------------------------|--------|-------|-------|-------|-------|-------|------|------|-------|-------|-------|
| BT0319 | hypothetical protein                                     |        |       |       |       |       |       |      |      | 162.6 | 346.7 | 101.6 |
| BT0348 | Glycoside hydrolase family 51                            | 41.2   | 12.6  | 25.6  |       | 31.8  |       |      |      | 18.1  |       |       |
| BT0349 | hypothetical protein                                     | 49.2   | 11.6  | 31.3  |       | 47.6  |       |      |      | 16.0  |       | 19.1  |
| BT0360 | Glycoside hydrolase family 43                            | 315.8  |       | 156.7 |       |       |       |      |      | 67.6  |       | 13.1  |
| BT0361 | susD-like                                                | 381.0  |       | 210.0 |       |       |       |      |      | 156.1 | 28.2  | 46.6  |
| BT0362 | susC-like                                                | 234.0  |       | 118.8 |       |       |       |      |      | 57.2  |       | 11.4  |
| BT0365 | hypothetical protein                                     | 1222.0 |       | 676.7 |       |       |       |      |      | 780.7 | 29.0  | 100.0 |
| BT0366 | hybrid two-component system (HTCS)                       | 35.1   |       | 16.9  |       |       |       |      |      | 10.9  |       |       |
| BT0367 | Glycoside hydrolase family 43                            | 1723.0 |       | 944.6 | 12.1  |       |       | 12.0 |      | 200.7 |       | 16.1  |
| BT0368 | Glycoside hydrolase family 51                            | 52.5   |       | 30.7  |       |       |       |      |      | 20.3  |       |       |
| BT0369 | Glycoside hydrolase family 43                            | 77.2   |       | 43.3  |       |       |       |      |      | 19.4  |       | 15.1  |
| BT0565 | putative heat shock protein                              |        |       |       |       |       |       |      |      | 15.2  | 11.7  |       |
| BT0787 | succinyl-CoA synthetase alpha chain                      |        |       |       |       |       |       |      |      | 15.3  | 30.4  |       |
| BT0788 | succinyl-CoA synthetase beta chain                       |        |       |       |       |       |       |      |      | 11.2  | 35.2  |       |
| BT0978 | ECF-type sigma factor                                    |        |       | 17.9  |       | 146.2 | 251.3 |      |      | 22.3  |       | 15.4  |
| BT1029 | susC-like                                                |        |       | 14.8  |       | 551.4 | 495.0 |      |      | 61.0  |       |       |
| BT1142 | hypothetical protein                                     |        | 10.2  |       |       |       |       |      |      | 37.4  | 16.9  |       |
| BT1448 | biotin carboxyl carrier protein                          |        |       |       |       |       |       |      |      | 26.8  | 58.1  | 15.6  |
| BT1449 | biotin carboxylase                                       |        |       |       |       |       |       |      |      | 36.4  | 52.9  | 18.6  |
| BT1450 | propionyl-CoA carboxylase beta chain                     |        |       |       |       |       |       |      |      | 38.6  | 51.1  | 16.8  |
| BT1491 | hypothetical protein                                     |        |       |       |       |       |       |      |      | 24.6  | 12.2  | 26.0  |
| BT1535 | ABC transporter ATP-binding protein                      | 12.0   |       | 11.6  |       |       |       |      |      | 134.0 |       | 16.6  |
| BT1757 | fructokinase                                             |        |       |       |       |       |       |      |      | 23.1  |       | 10.5  |
| BT1758 | glucose/galactose transporter                            |        |       |       | 16.9  |       |       |      |      | 96.9  | 19.2  | 38.9  |
| BT1760 | Glycoside hydrolase family 32                            |        |       |       | 21.9  |       |       |      |      | 72.5  | 50.8  | 90.4  |
| BT1761 | hypothetical protein                                     |        |       |       | 22.9  |       |       |      |      | 83.0  | 21.9  | 36.1  |
| BT1763 | susC-like                                                |        |       |       | 13.7  |       |       |      |      | 42.2  | 14.5  | 24.4  |
| BT1765 | Glycoside hydrolase family 32                            |        |       |       | 13.3  |       |       |      |      | 40.8  | 10.0  | 21.6  |
| BT2131 | hypothetical protein                                     |        | 10.6  |       |       |       |       |      |      | 19.8  | 278.8 | 273.3 |
| BT2500 | hypothetical protein                                     |        |       |       |       |       |       |      |      | 150.7 | 19.4  |       |
| BT3046 | susC-like                                                | 22.2   |       |       |       |       |       |      |      | 43.6  |       |       |
| BT3047 | hypothetical protein                                     | 184.1  | 41.8  | 33.6  | 30.2  |       | 28.8  | 10.8 | 24.3 | 365.2 | 22.0  | 61.0  |
| BT3082 | Glycoside hydrolase family 32                            |        |       |       |       |       |       |      |      | 18.2  |       |       |
| BT3614 | putative oxidoreductase                                  |        |       |       |       | 54.2  | 103.8 |      |      | 23.1  |       |       |
| BT3655 | Glycoside hydrolase family 43                            |        | 24.8  |       |       |       |       |      |      | 17.4  |       |       |
| BT3656 | Glycoside hydrolase family 43                            |        | 20.9  |       |       |       |       |      |      | 19.1  |       |       |
| BT3681 | susD-like                                                | 88.3   | 619.8 | 58.9  | 20.4  | 11.4  |       | 13.6 |      | 33.7  |       |       |
| BT3699 | outer membrane protein SusF                              |        |       |       |       |       |       |      | 43.7 | 11.5  |       | 24.2  |
| BT3700 | outer membrane protein SusE                              |        |       |       |       |       |       |      | 54.2 | 15.9  | 17.1  | 49.3  |
| BT3702 | susC , outer membrane protein involved in starch binding |        |       |       |       |       |       |      | 29.2 | 11.3  |       | 17.6  |
| BT3703 | susB, Glycoside hydrolase family 97                      |        |       |       |       |       |       |      | 26.4 | 10.9  |       | 23.1  |
| BT3704 | susA, Glycoside hydrolase family 13                      |        |       |       |       |       |       |      | 77.8 | 11.2  |       | 16.5  |
| BT3735 | hypothetical protein                                     |        |       |       |       |       |       |      |      | 13.9  |       | 14.8  |
| BT3764 | L-rhamnose isomerase                                     | 163.7  |       | 147.7 | 55.0  | 245.6 | 263.4 |      |      | 33.8  | 13.4  |       |
| BT4113 | susD-like                                                |        |       | 53.0  | 92.6  | 49.3  | 50.7  |      |      | 12.5  | 38.1  | 74.4  |
| BT4114 | susC-like                                                |        |       | 68.2  | 136.1 | 82.7  | 73.7  |      |      | 11.7  | 20.4  | 34.2  |
| BT4120 | hypothetical protein                                     |        |       | 61.0  | 187.9 |       | 148.2 |      |      | 36.3  |       |       |
| BT4121 | susC-like                                                |        |       | 53.6  | 224.5 |       | 145.6 |      |      | 14.5  |       |       |
| BT4122 | susD-like                                                |        |       | 187.5 | 755.4 |       | 404.4 |      |      | 209.1 | 28.7  | 14.4  |
| BT4153 | Glycoside hydrolase family 28                            | 52.9   |       | 45.3  | 13.2  | 70.7  | 13.7  |      |      | 13.5  |       |       |
| BT4163 | hypothetical protein                                     | 101.3  |       | 72.9  | 36.3  | 186.5 | 46.2  |      |      | 20.7  |       |       |
| BT4164 | susC-like                                                | 88.2   |       | 68.0  | 34.0  | 135.7 | 38.3  |      |      | 10.6  |       |       |
| BT4165 | susD-like                                                | 114.9  |       | 83.3  | 37.6  | 128.0 | 50.8  |      |      | 16.1  |       |       |
| BT4166 | putative lipoprotein                                     | 69.0   |       | 48.7  | 29.5  | 92.8  | 29.0  |      |      | 10.9  |       |       |
| BT4167 | hypothetical protein                                     | 68.6   |       | 53.3  | 26.3  | 71.3  | 27.1  |      |      | 11.4  |       |       |
| BT4169 | susD-like                                                | 77.1   |       | 67.0  | 35.9  | 93.8  | 38.5  |      |      | 16.6  |       |       |
| BT4170 | Polysaccharide lyase family 9                            | 34.5   |       | 26.1  | 12.9  | 47.4  | 14.8  |      |      | 10.7  |       |       |
| BT4172 | hypothetical protein                                     | 52.1   |       | 45.4  | 16.3  | 65.4  | 19.7  |      |      | 10.9  |       |       |
| BT4175 | Polysaccharide lyase family 11                           | 73.6   |       | 57.0  | 20.0  | 140.7 | 28.2  |      |      | 18.3  |       |       |
| BT4176 | Glycoside hydrolase family 105                           | 35.2   |       | 25.6  | 11.4  | 48.1  | 12.4  |      |      | 10.0  |       |       |
| BT4667 | Glycoside hydrolase family 2                             | 13.8   |       | 123.4 | 25.9  |       |       |      |      | 78.6  |       | 24.0  |
| BT4668 | Glycoside hydrolase family 53                            | 13.7   |       | 140.7 | 21.4  |       |       |      |      | 136.6 | 16.9  | 46.9  |
| BT4670 | susD-like                                                |        |       | 104.6 |       |       |       |      |      | 72.9  |       | 14.0  |
| BT4672 | hypothetical protein                                     | 19.8   |       | 246.9 | 16.3  |       |       |      |      | 75.6  |       | 19.2  |

| Sector 3 |                                                                                                       |       |  |       |  |       |      |       |        |
|----------|-------------------------------------------------------------------------------------------------------|-------|--|-------|--|-------|------|-------|--------|
| BT0111   | hypothetical protein                                                                                  |       |  |       |  |       |      |       | 16.6   |
| BT0112   | putative permease                                                                                     |       |  |       |  |       |      |       | 13.6   |
| BT0113   | hypothetical protein                                                                                  |       |  |       |  |       |      |       | 10.0   |
| BT0115   | arsenate reductase                                                                                    |       |  |       |  |       |      |       | 24.7   |
| BT0116   | arsenical pump-driving ATPase                                                                         |       |  |       |  |       |      |       | 14.4   |
| BT0117   | arsenical resistance operon trans-acting repressor                                                    |       |  |       |  |       |      |       | 15.2   |
| BT0118   | putative cytochrome c biogenesis protein                                                              |       |  |       |  |       |      |       | 27.5   |
| BT0119   | hypothetical protein                                                                                  |       |  |       |  |       |      |       | 16.9   |
| BT0120   | hypothetical protein                                                                                  |       |  |       |  |       |      |       | 29.3   |
| BT0121   | transcriptional regulator, ArsR family                                                                |       |  |       |  |       |      |       | 10.6   |
| BT0198   | hypothetical protein                                                                                  | 10.8  |  |       |  |       |      |       |        |
| BT0262   | hypothetical protein                                                                                  |       |  |       |  |       |      |       | 66.1   |
| BT0263   | hypothetical protein                                                                                  |       |  |       |  |       |      |       | 42.0   |
| BT0264   | Glycoside hydrolase family 43                                                                         |       |  |       |  |       |      |       | 1860.0 |
| BT0265   | Glycoside hydrolase family 43                                                                         |       |  |       |  |       |      |       | 465.4  |
| BT0266   | hypothetical protein                                                                                  |       |  |       |  |       |      | 13.1  | 17.4   |
| BT0268   | susC-like                                                                                             |       |  |       |  |       |      |       | 72.7   |
| BT0269   | susD-like                                                                                             |       |  |       |  |       |      |       | 222.6  |
| BT0270   | hypothetical protein                                                                                  |       |  |       |  |       |      |       | 214.8  |
| BT0271   | hypothetical protein                                                                                  |       |  |       |  |       |      |       | 121.0  |
| BT0272   | susC-like                                                                                             |       |  |       |  |       |      |       | 123.1  |
| BT0273   | susD-like                                                                                             |       |  |       |  |       |      |       | 130.9  |
| BT0274   | hypothetical protein                                                                                  |       |  |       |  |       |      |       | 144.8  |
| BT0275   | hypothetical protein                                                                                  |       |  |       |  |       |      |       | 242.6  |
| BT0276   | hypothetical protein                                                                                  |       |  |       |  |       |      |       | 145.0  |
| BT0277   | hypothetical protein                                                                                  |       |  |       |  |       |      |       | 133.0  |
| BT0278   | hypothetical protein                                                                                  |       |  |       |  |       |      |       | 109.4  |
| BT0279   | hypothetical protein                                                                                  |       |  |       |  |       |      | 11.3  | 155.3  |
| BT0280   | transposase for insertion sequence element ISRM3                                                      |       |  |       |  |       |      |       | 11.7   |
| BT0284   | putative peptidoglycan binding protein (LPXTG motif)                                                  |       |  |       |  |       |      |       | 17.0   |
| BT0285   | putative tolQ-type transport protein                                                                  |       |  |       |  |       |      |       | 17.2   |
| BT0286   | hypothetical protein                                                                                  |       |  |       |  |       |      |       | 16.5   |
| BT0287   | putative biopolymer transmembrane protein                                                             |       |  |       |  |       |      |       | 21.4   |
| BT0288   | hypothetical protein                                                                                  |       |  |       |  |       |      |       | 22.4   |
| BT0290   | Glycoside hydrolase family 35                                                                         |       |  |       |  |       |      |       | 93.7   |
| BT0338   | hypothetical protein                                                                                  |       |  |       |  | 76.5  |      |       | 33.8   |
| BT0339   | Glycoside hydrolase family 31                                                                         |       |  |       |  | 107.5 |      |       | 142.6  |
| BT0340   | trimethylamine corrinoid protein 2 (TCP 2)                                                            |       |  |       |  | 42.4  |      |       | 68.9   |
|          |                                                                                                       |       |  |       |  |       |      | 10.6  | 15.6   |
| BT0341   | Na <sup>+</sup> /glucose cotransporter                                                                |       |  |       |  | 211.6 |      |       | 360.8  |
| BT0342   | hypothetical protein                                                                                  |       |  |       |  | 47.6  |      |       | 143.2  |
| BT0343   | methylcobamide:CoM methyltransferase mtbA                                                             |       |  |       |  | 82.1  |      |       | 154.5  |
|          |                                                                                                       |       |  |       |  |       |      | 11.3  | 10.7   |
|          |                                                                                                       |       |  |       |  |       |      |       | 10.1   |
| BT0350   | xylulose kinase (xylulokinase)                                                                        | 22.0  |  | 14.7  |  |       |      |       | 21.0   |
| BT0352   | hypothetical protein                                                                                  | 11.7  |  |       |  |       |      |       |        |
| BT0353   | putative sugar epimerase/aldolase                                                                     | 10.2  |  |       |  |       |      |       | 10.7   |
| BT0354   | hypothetical protein                                                                                  | 12.9  |  |       |  |       |      |       | 14.7   |
| BT0355   | Na <sup>+</sup> /glucose cotransporter                                                                | 12.9  |  | 10.2  |  |       |      |       | 13.7   |
| BT0356   | aldose 1-epimerase precursor                                                                          | 11.7  |  | 10.7  |  |       |      |       | 12.6   |
| BT0363   | susD-like                                                                                             | 471.2 |  | 256.2 |  |       |      | 98.6  | 13.6   |
| BT0364   | susC-like                                                                                             | 297.4 |  | 151.6 |  |       |      | 177.0 | 26.9   |
|          |                                                                                                       |       |  |       |  |       |      |       | 18.4   |
| BT0434   | hypothetical protein                                                                                  |       |  |       |  |       | 10.4 |       |        |
| BT0435   | hypothetical protein                                                                                  |       |  |       |  |       | 10.1 |       |        |
| BT0437   | N-acylglucosamine 2-epimerase                                                                         |       |  |       |  |       | 10.1 |       |        |
| BT0438   | Glycoside hydrolase family 89                                                                         |       |  |       |  |       | 14.1 |       | 11.0   |
| BT0442   | glycerophosphoryl diester phosphodiesterase                                                           |       |  |       |  |       | 10.9 |       | 10.6   |
|          |                                                                                                       |       |  |       |  |       |      |       | 10.0   |
| BT0622   | Na <sup>+</sup> -transporting NADH:ubiquinone oxidoreductase, Electron transport complex protein rnfA |       |  | 11.2  |  |       |      |       |        |
| BT0823   | uronate isomerase                                                                                     |       |  |       |  | 20.5  |      |       |        |
| BT0824   | transcriptional regulator (LacI family)                                                               |       |  | 19.9  |  | 10.4  |      |       | 14.3   |

|        |                                                    |       |       |       |       |       |       |      |       |      |      |
|--------|----------------------------------------------------|-------|-------|-------|-------|-------|-------|------|-------|------|------|
| BT0854 | hypothetical protein                               |       |       |       |       |       |       |      |       |      | 11.3 |
| BT0977 | hypothetical protein                               |       | 59.9  | 167.5 |       |       |       |      |       |      |      |
| BT0978 | ECF-type sigma factor                              |       |       | 251.3 |       |       |       |      |       |      |      |
| BT0979 | hypothetical protein                               |       |       | 14.1  |       |       |       |      |       |      |      |
| BT0980 | Polysaccharide lyase family 1                      |       |       | 11.5  |       |       |       |      |       |      |      |
| BT0982 | hypothetical protein                               |       | 20.5  | 62.1  |       |       |       |      |       |      |      |
| BT0983 | Glycoside hydrolase family 2                       |       | 14.2  | 24.0  |       |       |       |      |       |      |      |
| BT0984 | hypothetical protein                               |       |       | 22.9  |       |       |       |      |       |      |      |
| BT0985 | putative sialic acid-specific acetyltransferase II |       | 12.3  | 36.7  |       |       |       |      |       |      |      |
| BT0986 | Glycoside hydrolase family 106                     |       | 11.2  | 17.5  |       |       |       |      |       |      |      |
| BT0992 | Glycoside hydrolase family 2                       |       | 77.9  | 115.6 |       |       |       | 35.4 |       |      |      |
| BT0993 | Glycoside hydrolase family 2                       |       | 22.7  | 66.6  |       |       |       | 10.2 |       |      | 10.3 |
| BT0996 | Glycoside hydrolase family 2                       |       | 171.1 | 262.3 |       |       |       |      |       |      |      |
| BT0997 | hypothetical protein                               |       | 47.6  | 63.9  |       |       |       |      |       |      |      |
| BT1001 | Glycoside hydrolase family 78                      |       | 24.8  | 64.4  |       |       |       | 36.9 |       |      |      |
| BT1002 | hypothetical protein                               |       | 55.8  | 83.7  |       |       |       |      |       |      |      |
| BT1003 | hypothetical protein                               |       | 35.6  | 56.4  |       |       |       |      |       |      |      |
| BT1010 | Glycoside hydrolase family 95                      |       | 68.7  | 147.7 |       |       |       | 15.8 |       |      |      |
| BT1011 | Glycoside hydrolase family 105                     |       | 140.4 | 210.7 |       |       |       | 16.4 |       |      |      |
| BT1012 | hypothetical protein                               |       | 82.6  | 165.1 |       |       |       | 17.1 |       |      |      |
| BT1013 | Glycoside hydrolase family 78                      |       | 77.0  | 118.0 |       |       |       |      |       |      |      |
| BT1017 | hypothetical protein                               |       |       | 28.2  |       |       |       |      |       |      |      |
| BT1018 | Glycoside hydrolase family 28                      |       |       | 24.1  |       |       |       |      |       |      |      |
| BT1019 | Glycoside hydrolase family 78                      |       | 13.8  | 33.4  |       |       |       |      |       |      |      |
| BT1020 | hypothetical protein                               |       | 105.8 | 264.8 |       |       |       | 11.4 |       |      |      |
| BT1021 | Glycoside hydrolase family 43                      |       | 23.0  | 60.0  |       |       |       | 15.5 |       |      |      |
| BT1022 | hypothetical protein                               |       | 25.1  | 36.8  |       |       |       |      |       |      |      |
| BT1023 | Polysaccharide lyase family 1                      |       | 31.9  | 49.8  |       |       |       |      |       |      |      |
| BT1026 | hypothetical protein                               |       |       | 36.4  |       |       |       |      |       |      |      |
| BT1027 | hypothetical protein                               |       |       | 22.8  |       |       |       |      |       |      |      |
| BT1028 | susD-like                                          |       | 78.1  | 120.8 |       |       |       |      |       |      |      |
| BT1029 | susC-like                                          |       |       | 495.0 |       |       |       |      |       |      |      |
| BT1030 | hypothetical protein                               | 13.8  | 676.1 | 457.3 |       |       |       | 14.4 |       |      |      |
| BT1031 | hypothetical protein                               |       | 84.5  | 123.1 |       |       |       |      |       |      |      |
| BT1230 | hypothetical protein                               | 19.1  | 25.1  | 77.1  | 11.1  | 15.4  | 50.2  | 15.7 |       |      |      |
| BT1415 | cytochrome c biogenesis protein ccsA               |       |       | 11.4  |       |       |       |      |       |      |      |
| BT1417 | cytochrome C552 precursor                          |       |       | 14.4  |       |       |       |      |       |      | 14.1 |
| BT1418 | quinol oxidase                                     |       |       | 13.6  |       |       |       |      |       |      | 20.3 |
| BT1518 | hypothetical protein                               |       |       |       |       |       |       |      |       |      | 15.3 |
| BT1519 | N-acetylmuramoyl-L-alanine amidase                 |       |       |       |       |       |       | 14.1 |       |      | 17.8 |
| BT1682 | susD-like                                          |       | 182.2 | 115.6 |       |       |       |      |       |      | 13.4 |
| BT1683 | susC-like                                          |       | 148.2 | 106.8 |       |       |       |      |       |      | 12.1 |
| BT1759 | Glycoside hydrolase family 32                      |       | 24.7  |       |       |       | 92.3  | 29.1 |       |      | 56.5 |
| BT1762 | susD-like                                          |       | 70.0  |       |       |       | 396.7 | 61.9 |       |      | 80.2 |
| BT1884 | cold shock protein, putative DNA-binding protein   | 15.2  |       |       |       |       |       |      |       |      |      |
| BT1885 | putative ATP-dependent RNA helicase                | 10.3  |       |       |       |       |       |      |       |      |      |
| BT1903 | hypothetical protein                               |       |       |       |       |       |       |      |       | 11.9 |      |
| BT2096 | putative transcriptional regulator                 |       | 10.1  |       |       |       |       |      |       |      |      |
| BT2097 | hypothetical protein                               | 17.9  | 32.5  |       |       | 11.6  |       |      |       |      |      |
| BT2118 | transporter, AcrB/D/F family                       |       | 10.0  |       |       |       |       |      |       | 15.4 |      |
| BT2254 | Polysaccharide lyase family 10                     |       | 10.2  | 30.1  |       |       |       |      |       |      |      |
| BT2680 | Glycoside hydrolase family 2                       | 31.2  | 22.8  | 10.4  | 50.7  | 12.8  |       |      |       |      |      |
| BT2813 | sodium-dependent multivitamin transporter          |       |       |       | 201.7 | 184.0 |       |      | 18.4  |      |      |
| BT2814 | dihydrodipicolinate synthase                       |       |       |       | 275.5 | 219.5 |       |      | 13.0  |      |      |
| BT3044 | hypothetical protein                               | 32.6  |       |       |       |       |       |      | 88.3  |      | 14.7 |
| BT3045 | susD-like                                          | 19.4  |       |       |       |       |       |      | 256.9 | 21.0 | 59.5 |
| BT3086 | Glycoside hydrolase family 31                      |       | 13.9  | 17.4  | 17.0  | 10.3  |       | 14.5 |       |      |      |
| BT3420 | hypothetical protein                               | 133.4 |       |       |       |       |       |      | 10.1  |      |      |
| BT3421 | hypothetical protein                               | 59.6  |       |       |       |       |       |      |       |      |      |
| BT3422 | hypothetical protein                               | 54.8  |       |       |       |       |       |      |       |      |      |
| BT3423 | hypothetical protein                               | 89.6  |       |       |       |       |       |      |       |      |      |
| BT3424 | hypothetical protein                               | 58.1  |       |       |       |       |       |      |       |      |      |
| BT3425 | hypothetical protein                               | 17.9  |       |       |       |       |       |      |       |      |      |
| BT3615 | hypothetical protein                               |       |       | 87.2  | 121.7 |       |       |      | 34.2  |      | 10.8 |

|                 |                                                         |       |       |       |       |       |      |       |      |       |       |       |       |
|-----------------|---------------------------------------------------------|-------|-------|-------|-------|-------|------|-------|------|-------|-------|-------|-------|
| BT3616          | fucose permease                                         |       |       |       | 49.7  | 80.0  |      |       |      |       |       |       |       |
| BT3617          | sorbitol dehydrogenase                                  |       |       |       | 42.2  | 111.0 |      |       | 12.6 | 10.9  |       |       |       |
| BT3654          | Glycoside hydrolase family 35                           |       | 23.7  |       |       |       |      |       | 25.1 |       |       |       |       |
| BT3657          | Glycoside hydrolase family 51                           |       | 20.9  |       |       |       |      |       | 29.6 |       |       | 15.0  |       |
| BT3658          | hypothetical protein                                    | 28.3  | 74.2  | 10.3  |       |       |      |       | 43.9 |       |       | 12.6  |       |
| BT3662          | Glycoside hydrolase family 43                           |       |       |       | 13.0  | 21.3  |      |       |      |       | 29.7  |       |       |
| BT3665          | Glycoside hydrolase family 29                           |       |       |       | 11.5  | 23.9  |      |       |      |       | 28.7  |       |       |
| BT3669          | hypothetical protein                                    |       |       |       | 18.5  | 53.1  |      |       |      |       | 45.6  |       |       |
| BT3672          | hypothetical protein                                    |       |       |       | 75.0  | 123.1 |      |       |      |       | 65.8  |       |       |
| BT3674          | hypothetical protein                                    |       | 19.7  |       |       |       |      |       | 16.4 | 10.8  |       | 22.6  |       |
| BT3675          | Glycoside hydrolase family 43                           | 10.3  | 33.1  |       |       |       |      |       |      |       |       |       |       |
| BT3676          | hypothetical protein                                    |       | 33.1  |       |       |       |      |       |      |       |       |       |       |
| BT3677          | hypothetical protein                                    |       | 21.5  |       |       |       |      |       |      |       |       |       |       |
| BT3679          | conserved hypothetical protein, with a conserved domain | 10.9  | 110.5 | 10.4  |       |       |      |       |      | 13.5  |       |       |       |
| BT3680          | susC-like                                               | 54.6  | 625.5 | 50.6  |       |       |      |       |      | 45.3  |       | 10.4  |       |
| BT3682          | hypothetical protein                                    | 33.4  | 170.8 | 19.8  |       |       |      |       | 77.0 | 22.4  |       | 44.8  |       |
| BT3683          | Glycoside hydrolase family 16                           | 12.2  | 83.6  |       |       |       |      |       |      |       |       |       |       |
| BT3685          | Glycoside hydrolase family 43                           |       | 12.2  |       |       |       |      |       |      |       |       |       |       |
| BT3686          | hypothetical protein                                    |       | 13.9  |       |       |       |      |       |      |       |       |       |       |
| BT3698          | alpha-amylase, susG                                     |       |       |       |       |       | 53.9 |       |      |       |       | 22.6  |       |
| BT3701          | susD                                                    |       |       |       |       |       | 33.0 |       |      |       |       | 12.4  |       |
| BT3747          | hypothetical protein                                    |       | 36.6  |       |       |       |      |       |      |       |       |       |       |
| BT3763          | rhamnulose kinase/L-fuculose kinase                     | 497.1 |       | 523.4 | 184.0 | 602.2 |      | 827.6 | 11.2 | 28.7  |       |       |       |
| BT3765          | L-rhamnose/H+ symporter                                 | 371.2 |       | 305.7 | 105.3 | 433.8 |      | 471.2 |      | 113.0 | 19.6  |       |       |
| BT3766          | rhamnulose-1-phosphate aldolase                         | 350.4 |       | 244.1 | 102.2 | 451.4 |      | 339.3 |      | 229.0 | 103.5 | 58.6  |       |
| BT3767          | lactaldehyde reductase                                  | 10.5  |       |       |       | 12.9  |      | 14.8  |      |       |       |       |       |
| BT4105          | hexuronate transporter                                  |       | 10.1  | 17.1  |       | 16.1  |      | 12.4  |      |       |       |       |       |
| BT4109          | Carbohydrate esterase family 8                          |       | 117.0 | 374.2 | 51.8  | 140.9 | 19.4 | 18.2  | 12.0 |       |       |       |       |
| BT4110          | Carbohydrate esterase family 8                          |       | 37.5  | 90.5  | 21.1  | 56.9  |      |       |      |       | 10.2  | 13.7  |       |
| BT4112          | hypothetical protein                                    |       | 64.5  | 138.2 | 46.3  | 57.9  |      |       |      |       | 12.0  | 28.8  |       |
| BT4115          | Polysaccharide lyase family 1                           |       | 36.5  | 73.6  | 11.0  | 24.4  |      |       |      |       |       |       |       |
| BT4116          | Polysaccharide lyase family 1                           |       | 37.4  | 127.8 | 39.5  | 46.2  |      |       |      |       |       |       |       |
| BT4119          | Polysaccharide lyase family 1                           |       | 36.5  | 135.5 |       | 89.1  |      |       |      | 11.6  |       | 14.7  |       |
| BT4123          | Glycoside hydrolase family 28                           |       | 37.6  | 150.8 |       | 42.0  |      |       |      |       |       |       |       |
| BT4124          | hybrid two-component system (HTCS)                      |       |       | 24.2  |       |       |      |       |      |       |       |       |       |
| BT4145          | Glycoside hydrolase family 106                          | 14.0  |       | 13.9  |       | 20.7  |      |       |      |       |       |       |       |
| BT4146          | Glycoside hydrolase family 28                           | 21.5  |       | 17.5  |       | 29.8  |      |       |      |       |       |       |       |
| BT4147          | hypothetical protein                                    | 21.2  |       | 19.1  |       | 19.2  |      |       |      |       |       |       |       |
| BT4148          | hypothetical protein                                    | 22.5  |       | 18.5  |       | 34.9  |      |       |      |       |       |       |       |
| BT4149          | Glycoside hydrolase family 28                           | 46.7  |       | 38.4  | 16.0  | 64.3  |      | 20.1  |      |       |       |       |       |
| BT4150          | Carbohydrate esterase family 12                         | 37.5  |       | 33.8  | 15.4  | 73.3  |      | 13.1  |      |       |       |       |       |
| BT4151          | Glycoside hydrolase family 2                            | 242.3 |       | 219.9 | 91.1  | 568.6 |      | 75.0  |      | 26.3  | 17.6  | 23.4  |       |
| BT4152          | Glycoside hydrolase family 42                           | 212.2 |       | 151.8 | 44.3  | 178.7 |      | 60.2  |      | 33.6  |       |       |       |
| BT4154          | Carbohydrate esterase family 4                          | 22.7  |       | 17.8  |       | 16.5  |      |       |      |       |       |       |       |
| BT4155          | Glycoside hydrolase family 28                           |       |       |       |       | 11.0  |      |       |      |       |       |       |       |
| BT4156          | Glycoside hydrolase family 2                            | 10.2  |       |       |       | 10.7  |      |       |      |       |       |       |       |
| BT4158          | hypothetical protein                                    | 70.2  |       | 52.7  | 24.8  | 132.5 |      | 36.6  |      |       |       |       |       |
| BT4159          | hypothetical protein                                    | 24.8  |       | 23.2  |       | 88.9  |      | 19.7  |      |       |       |       |       |
| BT4160          | beta-galactosidase precursor                            | 31.7  |       | 36.3  | 12.4  | 77.6  |      | 51.2  |      | 12.7  |       |       |       |
| BT4168          | susC-like                                               | 39.8  |       | 28.8  | 19.6  | 60.3  |      | 17.4  |      |       |       |       |       |
| BT4171          | hypothetical protein                                    | 49.6  |       | 36.2  | 24.2  | 77.5  |      | 15.7  |      |       |       |       |       |
| BT4173          | Carbohydrate esterase family 12                         | 19.9  |       | 14.8  |       | 64.0  |      | 10.6  |      |       |       |       |       |
| BT4174          | Glycoside hydrolase family 105                          | 31.0  |       | 22.3  |       | 62.2  |      | 13.7  |      |       |       |       |       |
| BT4177          | hypothetical protein                                    | 64.6  |       | 48.6  | 20.2  | 68.1  |      | 23.2  |      |       |       |       |       |
| BT4181          | Glycoside hydrolase family 2                            | 17.4  |       |       |       |       |      |       |      |       |       |       |       |
| BT4183          | Polysaccharide lyase family 9                           | 53.9  |       | 27.6  | 13.5  | 55.5  |      | 21.2  |      |       |       |       |       |
| BT4185          | Glycoside hydrolase family 43                           |       |       | 12.8  | 33.0  |       |      | 12.1  |      |       |       |       |       |
| BT4187          | Glycoside hydrolase family 28                           |       |       | 35.2  | 75.1  | 37.4  |      | 40.6  |      |       |       |       |       |
| BT4227          | hypothetical protein                                    |       |       |       |       |       | 10.4 |       |      |       | 11.2  | 53.2  | 19.3  |
| BT4669          | hypothetical protein                                    | 130.9 |       | 881.2 | 140.3 | 24.8  |      |       | 13.1 | 12.6  | 404.4 | 34.4  | 144.9 |
| BT4671          | susC-like                                               | 27.5  |       | 192.0 | 19.2  |       |      |       |      |       | 56.2  |       | 20.2  |
| <b>Sector 4</b> |                                                         |       |       |       |       |       |      |       |      |       |       |       |       |
| BT0506          | Glycoside hydrolase family 20                           |       |       |       |       |       |      |       |      | 18.5  | 11.2  | 34.8  | 52.9  |
| BT0791          | hypothetical protein                                    |       |       |       |       |       |      |       | 13.4 |       | 13.8  |       |       |
| BT1036          | hypothetical protein                                    |       |       |       |       |       |      |       |      |       | 35.4  | 153.4 | 39.5  |

|                 |                                                       |      |      |       |       |       |        |       |  |      |      |       |       |       |
|-----------------|-------------------------------------------------------|------|------|-------|-------|-------|--------|-------|--|------|------|-------|-------|-------|
| BT1037          | hypothetical protein                                  |      |      |       |       |       | 54.4   |       |  |      |      | 50.1  | 202.3 | 29.4  |
| BT1038          | hypothetical protein                                  |      |      |       |       |       | 62.0   |       |  |      |      | 79.5  | 271.1 | 51.8  |
| BT1039          | susD-like                                             |      |      |       |       |       | 37.2   |       |  |      |      | 62.4  | 198.8 | 42.7  |
| BT1040          | susC-like                                             |      |      |       |       |       | 48.0   |       |  |      |      | 39.3  | 190.7 | 39.4  |
| BT1042          | susC-like                                             |      |      |       |       |       | 20.4   |       |  |      |      | 19.2  | 127.6 | 238.0 |
| BT1043          | susD-like                                             |      |      |       |       |       | 17.8   |       |  |      |      | 16.8  | 98.1  | 182.3 |
| BT1044          | Glycoside hydrolase family 18                         |      |      |       |       |       | 20.7   |       |  |      |      | 22.0  | 161.8 | 275.4 |
| BT1045          | hypothetical protein                                  |      |      |       |       |       | 13.1   |       |  |      |      | 10.8  | 51.0  | 100.3 |
| BT1046          | susC-like                                             |      |      |       |       |       | 78.3   |       |  |      |      | 288.2 | 158.8 | 82.1  |
| BT1048          | Glycoside hydrolase family 18                         |      |      |       |       |       | 11.5   |       |  |      |      | 43.2  | 191.2 | 96.1  |
| BT1534          | hypothetical protein                                  |      |      |       |       |       | 22.6   |       |  |      |      | 132.7 |       | 14.7  |
| BT1554          | alanine dehydrogenase                                 |      |      |       |       |       |        |       |  | 10.8 |      | 33.5  | 36.0  |       |
| BT2559          | susD-like                                             |      |      |       |       |       |        | 11.9  |  |      |      | 16.2  | 20.5  |       |
| BT2561          | putative anti-sigma factor                            |      |      |       |       |       |        | 11.2  |  |      |      | 20.7  | 12.7  |       |
| BT2818          | susC-like                                             |      |      |       |       |       | 368.2  |       |  |      |      | 22.6  | 37.5  | 14.8  |
| BT2820          | susC-like                                             |      |      |       |       |       | 4216.0 |       |  |      |      | 230.1 | 46.8  |       |
| BT2821          | susD-like                                             |      |      |       |       |       | 433.0  |       |  |      |      | 32.5  | 87.3  | 16.5  |
| BT2822          | hypothetical protein                                  |      |      |       |       |       | 139.5  |       |  |      |      | 11.6  | 30.1  |       |
| BT2823          | hypothetical protein                                  |      |      |       |       |       | 3671.0 |       |  |      |      | 206.2 | 508.4 | 81.9  |
| BT3778          | hypothetical protein                                  |      |      |       |       |       |        | 113.5 |  |      |      | 14.2  | 34.0  | 10.7  |
| BT3790          | hypothetical protein                                  |      |      |       | 17.0  |       |        | 139.3 |  |      |      | 11.5  |       |       |
| BT3860          | hypothetical protein                                  |      |      |       |       |       |        | 21.7  |  |      |      | 36.8  | 16.0  |       |
| BT4294          | hypothetical protein                                  |      |      |       |       |       | 24.3   |       |  |      |      | 12.1  | 92.9  | 109.8 |
| BT4295          | putative chitinase                                    |      |      |       |       |       | 30.8   |       |  |      | 13.5 | 23.9  | 406.3 | 488.3 |
| BT4296          | hypothetical protein                                  |      |      |       |       |       | 32.8   |       |  |      | 17.9 | 21.8  | 109.2 | 126.3 |
| BT4297          | susD-like                                             |      |      |       |       |       | 37.3   |       |  |      | 16.1 | 23.9  | 77.9  | 76.8  |
| BT4298          | susC-like                                             |      |      |       |       |       | 33.5   |       |  |      | 16.5 | 23.4  | 472.6 | 415.8 |
| BT4299          | hypothetical protein                                  |      |      |       |       |       | 38.0   |       |  |      | 19.0 | 20.6  | 126.4 | 176.8 |
| BT4407          | hypothetical protein                                  |      |      |       |       |       | 12.6   |       |  |      |      | 34.1  | 37.6  | 92.1  |
| BT4648          | hypothetical protein                                  |      |      |       |       |       |        |       |  | 11.8 |      | 55.3  | 13.4  |       |
| <b>Sector 5</b> |                                                       |      |      |       |       |       |        |       |  |      |      |       |       |       |
| BT1536          | ABC transporter permease                              | 33.6 |      | 32.7  | 16.8  |       |        | 11.7  |  |      |      | 207.2 | 45.6  | 15.6  |
| BT2167          | elongation factor G                                   |      | 15.1 | 11.6  | 20.1  | 12.6  | 10.1   |       |  | 37.0 | 11.5 | 79.2  | 186.5 | 101.1 |
| BT3221          | hypothetical protein                                  |      |      | 86.3  |       | 17.6  |        |       |  |      |      | 171.9 |       |       |
| BT3222          | hypothetical protein                                  |      |      | 94.8  |       |       |        |       |  |      |      | 219.9 |       |       |
| BT3223          | hypothetical protein                                  |      |      | 52.5  |       |       |        |       |  |      |      | 123.4 |       |       |
| BT3572          | hypothetical protein                                  |      | 14.6 |       |       |       |        |       |  |      |      | 17.5  |       |       |
| BT3573          | hypothetical protein                                  |      | 15.5 |       |       |       |        |       |  |      |      | 18.1  | 22.5  |       |
| BT3793          | hypothetical protein                                  |      |      |       |       |       |        |       |  | 30.1 |      | 56.7  | 112.8 | 31.3  |
| BT4108          | Glycoside hydrolase family 105                        | 19.1 |      | 131.6 | 300.3 | 103.2 | 146.7  |       |  | 28.2 | 13.6 | 16.2  | 16.7  | 12.9  |
| BT4384          | hypothetical protein                                  |      |      |       |       |       |        | 15.9  |  |      |      | 20.2  | 10.0  | 10.3  |
| <b>Sector 6</b> |                                                       |      |      |       |       |       |        |       |  |      |      |       |       |       |
| BT0489          | putative gluconate aldolase                           |      |      |       | 11.7  | 13.7  |        |       |  |      | 11.2 | 14.0  |       |       |
| BT1211          | hypothetical protein                                  | 10.7 |      |       |       |       | 10.9   |       |  |      |      | 12.7  |       |       |
| BT1572          | RNA polymerase ECF-type sigma factor                  | 31.7 |      | 51.1  | 58.4  |       | 54.3   |       |  | 54.7 |      | 52.8  |       |       |
| BT1604          | hypothetical protein                                  | 12.2 |      | 21.4  | 10.4  |       | 10.6   |       |  | 15.9 |      | 11.7  |       |       |
| BT3231          | 4-deoxy-L-threo-5-hexosulose-uronate ketol- isomerase |      |      |       | 10.9  |       |        |       |  | 13.3 | 19.7 | 15.4  |       |       |
| BT3571          | hypothetical protein                                  |      | 21.7 |       |       |       |        | 203.9 |  |      |      | 13.2  |       |       |
| BT3574          | hypothetical protein                                  |      | 17.8 |       |       |       |        | 75.6  |  |      |      |       |       |       |
| BT3575          | hypothetical protein                                  |      |      |       |       |       |        | 54.7  |  |      |      |       |       |       |
| BT4106          | 4-deoxy-L-threo-5-hexosulose-uronate ketol- isomerase |      |      |       | 12.2  | 21.7  | 11.9   |       |  | 15.3 | 23.7 | 35.8  |       |       |
| BT4107          | putative phosphotransferase enzyme II, C component    | 10.3 |      | 12.3  | 14.9  | 14.2  | 14.1   |       |  | 30.0 | 26.3 | 38.2  |       |       |
| BT4393          | hypothetical protein                                  |      |      |       |       | 11.5  |        | 14.9  |  |      | 14.7 |       | 27.8  | 14.7  |
| BT4715          | non-specific DNA-binding protein Dps                  | 23.4 |      | 21.7  | 21.6  |       | 33.0   |       |  | 27.8 | 22.1 |       |       |       |
| <b>Sector 7</b> |                                                       |      |      |       |       |       |        |       |  |      |      |       |       |       |
| BT0215          | iron uptake regulatory protein                        |      |      |       |       |       |        |       |  | 10.3 |      |       |       |       |
| BT0459          | Glycoside hydrolase family 20                         |      |      |       |       |       |        | 11.2  |  |      |      |       | 22.3  | 15.5  |
| BT0488          | 2-dehydro-3-deoxygluconokinase                        |      |      |       |       |       |        |       |  |      | 11.2 |       |       |       |
| BT1049          | putative patatin-like protein                         |      |      |       |       |       |        | 20.5  |  |      |      | 83.4  | 269.7 | 119.0 |
| BT1273          | L-fucose isomerase                                    |      |      |       |       |       |        | 21.6  |  |      |      |       |       |       |
| BT1274          | L-fuculose-1-phosphate aldolase                       |      |      |       |       |       |        | 15.6  |  |      |      |       |       |       |

|        |                                                                                        |      |      |        |       |      |      |       |      |
|--------|----------------------------------------------------------------------------------------|------|------|--------|-------|------|------|-------|------|
| BT1275 | L-fucose kinase                                                                        |      |      | 20.3   |       |      |      |       |      |
| BT1276 | hypothetical protein                                                                   |      |      | 25.4   |       |      |      | 14.1  | 17.5 |
| BT1277 | L-fucose permease                                                                      |      |      | 33.2   |       |      |      | 11.4  | 13.3 |
| BT1532 | ABC transporter permease                                                               |      |      | 14.2   |       |      |      | 181.0 | 21.2 |
| BT1596 | putative sulfatase yidJ                                                                |      |      |        |       | 11.7 | 40.9 |       |      |
| BT1626 | Glycoside hydrolase family 2                                                           |      |      | 12.1   |       |      |      |       |      |
| BT1627 | Glycoside hydrolase family 20                                                          |      |      | 20.0   |       |      |      |       |      |
| BT1628 | putative sulfatase yidJ                                                                |      |      | 17.2   |       |      |      |       |      |
| BT1629 | hypothetical protein                                                                   |      |      |        |       |      | 15.0 |       | 18.1 |
| BT1631 | susC-like                                                                              |      |      |        |       | 10.7 | 11.7 | 11.4  | 14.3 |
| BT2119 | transmembrane protein precursor, possibly involved in transport                        | 10.0 | 10.1 |        |       |      |      | 10.4  | 11.0 |
| BT2451 | putative pyrogenic exotoxin B                                                          |      |      | 12.2   |       |      |      |       |      |
| BT2560 | susC-like                                                                              |      |      |        | 13.8  |      |      | 21.3  | 25.0 |
| BT2615 | reverse transcriptase                                                                  |      |      |        | 50.0  |      |      |       |      |
| BT2617 | reverse transcriptase                                                                  |      |      |        | 95.0  |      |      |       |      |
| BT2618 | two-component system response regulator                                                |      | 12.7 | 232.3  |       |      |      |       |      |
| BT2619 | two-component system sensor histidine kinase                                           |      |      |        | 39.8  |      |      |       |      |
| BT2620 | Glycoside hydrolase family 97                                                          |      | 11.3 | 84.4   |       |      |      |       |      |
| BT2621 | hypothetical protein                                                                   |      |      | 75.3   |       |      |      |       |      |
| BT2622 | Glycoside hydrolase family 67                                                          |      |      | 78.7   |       |      |      |       |      |
| BT2623 | Glycoside hydrolase family 76                                                          |      | 18.8 | 168.8  |       |      |      | 14.6  | 20.0 |
| BT2624 | hypothetical protein                                                                   |      | 12.3 | 93.2   |       |      |      |       | 17.0 |
| BT2625 | susD-like                                                                              |      | 17.8 | 128.8  |       |      |      |       | 12.3 |
| BT2626 | susC-like                                                                              |      | 16.4 | 128.2  |       |      |      |       | 33.4 |
| BT2627 | putative cell surface protein, have conserved domain                                   |      | 18.7 | 104.7  |       |      |      |       | 23.2 |
| BT2628 | hybrid two-component system (HTCS)                                                     |      |      | 55.7   |       |      |      |       | 14.9 |
| BT2629 | Glycoside hydrolase family 92                                                          |      | 15.6 | 99.0   |       |      |      |       | 12.9 |
| BT2630 | conserved hypothetical protein with endonuclease/exonuclease/phosphatase family domain |      |      | 16.6   |       |      |      |       |      |
| BT2631 | Glycoside hydrolase family 76                                                          |      |      | 13.1   |       |      |      |       |      |
| BT2632 | hypothetical protein                                                                   |      |      | 15.6   |       |      |      |       |      |
| BT2633 | hypothetical protein                                                                   |      |      | 14.3   |       |      |      |       |      |
| BT2812 | alkyl hydroperoxide reductase C22 protein                                              |      |      |        |       |      | 10.5 |       |      |
| BT2819 | susD-like                                                                              |      |      | 416.8  |       |      |      | 27.9  | 45.8 |
| BT2824 | Glycoside hydrolase family 16                                                          |      |      | 1264.0 |       |      |      | 79.3  | 66.5 |
| BT2825 | Glycoside hydrolase family 18                                                          |      |      | 77.7   |       |      |      |       | 18.6 |
| BT2919 | susD-like                                                                              |      |      |        |       |      | 20.7 |       | 10.7 |
| BT2920 | susC-like                                                                              |      |      | 14.5   |       |      | 51.8 | 14.4  | 44.0 |
| BT3233 | hypothetical protein                                                                   |      |      |        |       |      | 10.1 |       | 45.3 |
| BT3324 | Polysaccharide lyase family 8                                                          |      |      |        | 78.5  |      |      | 100.3 |      |
| BT3328 | hypothetical protein                                                                   |      |      |        | 57.2  |      |      | 71.9  |      |
| BT3329 | hypothetical protein                                                                   |      |      |        | 160.8 |      |      | 456.4 |      |
| BT3330 | hypothetical protein                                                                   |      |      |        | 184.7 |      |      | 433.3 |      |
| BT3331 | susD-like                                                                              |      |      |        | 94.6  |      |      | 171.3 |      |
| BT3332 | susC-like                                                                              |      |      |        | 120.6 |      |      | 314.6 |      |
| BT3333 | arylsulfatase A precursor (ASA)                                                        |      |      |        | 115.2 |      |      | 55.7  |      |
| BT3348 | Glycoside hydrolase family 88                                                          |      |      |        | 28.5  |      |      | 74.3  |      |
| BT3349 | putative sulfatase yidJ                                                                |      |      |        | 23.0  |      |      | 79.2  |      |
| BT3350 | Polysaccharide lyase family 8                                                          |      |      |        | 44.1  |      |      | 52.9  |      |
| BT3750 | susC-like                                                                              |      |      | 132.0  |       |      |      | 36.1  | 23.6 |
| BT3751 | outer membrane protein                                                                 |      |      | 15.8   |       |      |      |       | 12.4 |
| BT3752 | susD-like                                                                              |      |      | 19.1   |       |      |      |       |      |
| BT3753 | endo-beta-N-acetylglucosaminidase F2 precursor                                         |      |      | 12.7   |       |      |      |       |      |
| BT3754 | hypothetical protein                                                                   |      |      | 13.1   |       |      |      |       | 10.1 |
| BT3773 | Glycoside hydrolase family 92                                                          |      |      |        | 10.7  |      |      |       |      |
| BT3774 | Glycoside hydrolase family 38                                                          |      |      |        | 20.0  |      |      |       |      |
| BT3775 | hypothetical protein                                                                   |      |      |        | 52.0  |      |      | 41.4  | 14.7 |
| BT3776 | hypothetical protein                                                                   |      |      |        | 34.1  |      |      | 12.3  | 16.1 |
| BT3777 | hypothetical protein                                                                   |      |      |        | 70.6  |      |      | 54.2  | 86.6 |
| BT3779 | hypothetical protein                                                                   |      | 10.5 | 41.4   |       |      |      | 50.1  | 43.0 |
| BT3780 | hypothetical protein                                                                   |      | 10.3 | 88.5   |       |      |      |       |      |





|                 |                                                           |      |      |       |      |      |      |      |       |      |
|-----------------|-----------------------------------------------------------|------|------|-------|------|------|------|------|-------|------|
| BT0988          | Mg2+ transport ATPase protein B                           |      |      | 30.6  | 16.0 |      |      | 56.2 | 96.9  | 33.2 |
| BT1563          | hypothetical protein                                      |      |      |       |      |      |      | 14.5 | 24.8  |      |
| BT1566          | putative aluminum resistance protein                      |      |      |       |      |      |      | 11.7 | 17.9  |      |
| BT1567          | hypothetical protein                                      |      |      |       |      |      |      | 10.5 | 12.6  |      |
| BT1574          | putative outer membrane protein precursor                 |      |      |       |      |      |      | 24.4 |       |      |
| BT1798          | hypothetical protein                                      |      |      |       |      |      |      | 14.1 | 212.4 | 14.0 |
| BT1895          | hypothetical protein                                      |      |      |       |      |      |      | 17.2 | 36.3  | 85.0 |
| BT1896          | putative cell surface antigen                             |      |      |       |      |      |      | 17.5 | 59.8  | 20.4 |
| BT2387          | O-acetylhomoserine (thiol)-lyase                          |      |      |       |      |      |      | 14.6 | 14.4  |      |
| BT2409          | putative TonB-dependent outer membrane protein            |      |      |       |      |      |      | 37.6 | 28.3  | 23.3 |
| BT4037          | hypothetical protein                                      |      |      |       |      |      | 50.8 |      |       |      |
| BT4693          | cation efflux system protein                              |      |      | 104.9 | 16.9 |      |      | 10.3 | 16.0  |      |
| BT4694          | cation efflux system protein                              |      |      | 127.1 | 17.9 |      |      | 52.9 | 34.8  | 19.2 |
| BT4695          | outer membrane efflux protein precursor                   |      |      | 11.3  |      |      |      | 43.3 | 48.1  | 33.9 |
|                 |                                                           |      |      |       |      |      |      | 21.9 | 15.7  |      |
| <b>Sector 2</b> |                                                           |      |      |       |      |      |      |      |       |      |
| BT0226          | hypothetical protein                                      |      |      | 11.9  | 17.8 |      |      | 12.7 |       |      |
| BT1564          | hypothetical protein                                      |      |      |       |      |      |      | 15.5 | 21.5  |      |
| <b>Sector 3</b> |                                                           |      |      |       |      |      |      |      |       |      |
| BT1573          | hypothetical protein                                      |      |      | 10.3  |      |      |      |      |       |      |
| BT2157          | hypothetical protein                                      |      |      |       | 10.2 |      |      |      |       |      |
| <b>Sector 4</b> |                                                           |      |      |       |      |      |      |      |       |      |
| BT1419          | hypothetical protein                                      |      |      | 12.0  |      |      |      | 73.5 | 23.5  | 31.4 |
|                 |                                                           |      |      |       |      |      |      |      |       | 11.5 |
| <b>Sector 6</b> |                                                           |      |      |       |      |      |      |      |       |      |
| BT2156          | putative sugar phosphate isomerase/epimerase              |      | 11.9 | 13.7  | 10.7 | 15.1 |      | 15.6 |       |      |
| BT2158          | putative dehydrogenases and related proteins              |      |      |       |      | 11.0 |      | 10.9 |       |      |
| BT3113          | putative transmembrane efflux protein                     | 10.3 | 12.9 |       |      |      | 11.9 | 29.4 | 16.4  | 25.9 |
| BT3240          | susC-like                                                 | 12.9 | 11.8 |       |      |      | 11.2 |      | 10.1  | 10.8 |
| BT3241          | susD-like                                                 | 13.2 | 14.8 |       |      |      | 13.0 | 15.1 | 10.9  |      |
| BT3242          | hypothetical protein                                      | 15.4 | 17.3 |       |      |      | 17.4 | 18.7 | 18.1  |      |
| BT3243          | hypothetical protein                                      | 10.7 | 10.7 |       |      |      | 10.9 | 11.0 | 11.9  |      |
| BT3244          | hypothetical protein                                      | 13.5 | 15.1 |       |      |      | 14.8 | 16.4 | 16.4  |      |
| <b>Sector 7</b> |                                                           |      |      |       |      |      |      |      |       |      |
| BT1420          | hypothetical protein                                      |      |      |       |      |      |      | 12.5 |       |      |
| BT2159          | putative oxidoreductase                                   |      |      |       |      |      |      |      | 10.3  | 10.4 |
| BT3430          | ribosomal protein S20                                     |      |      |       |      |      |      | 10.2 |       |      |
| BT4499          | conserved hypothetical protein, putative membrane protein |      |      | 18.8  |      |      |      | 10.6 | 104.8 | 16.1 |
