# Supplementary material for: Recognition and Degradation of Plant Cell Wall Polysaccharides by Two Human Gut Symbionts
Source: PubMed Central journal article supplement (PMC3243724; doi:10.1371/journal.pbio.1001221), 2011-12-20
Supplement: pbio.1001221.s012.pdf [file pbio.1001221.s012.pdf]

**Table S3. Hybrid two-component system mutants analyzed in this study**

| <b>Disrupted HTCS:</b>     | <b>PUL-associated</b> | <b>Substrate defect</b>                              |
|----------------------------|-----------------------|------------------------------------------------------|
| <i>BT0267</i>              | yes                   | arabinogalactan                                      |
| <i>BT0366</i>              | yes                   | arabinan                                             |
| <i>BT0958</i>              | no                    | none found                                           |
| <i>BT0981</i>              | yes                   | rhamnogalacturonan II                                |
| <i>BT1635</i>              | yes                   | none found                                           |
| <i>BT1734</i>              | no                    | none found                                           |
| <i>BT1754</i>              | yes                   | levan, fructose                                      |
| <i>BT2391</i>              | yes                   | none found                                           |
| <i>BT2628</i>              | yes                   | none found                                           |
| <i>BT2860</i>              | yes                   | none found                                           |
| <i>BT2897</i>              | yes                   | none found                                           |
| <i>BT2923</i>              | yes                   | none found                                           |
| <i>BT3049</i>              | yes                   | none found                                           |
| <i>BT3097</i>              | yes                   | none found                                           |
| <i>BT3172</i>              | yes                   | none found                                           |
| <i>BT3302</i>              | yes                   | none found                                           |
| <i>BT3334</i>              | yes                   | chondroitin sulfate, hyaluronan,<br>dermatan sulfate |
| <i>BT3465</i>              | yes                   | none found                                           |
| <i>BT3678</i>              | yes                   | none found                                           |
| <i>BT3738</i>              | no                    | none found                                           |
| <i>BT3786</i>              | yes                   | none found                                           |
| <i>BT4111</i>              | yes                   | homogalacturonan                                     |
| <i>BT4124</i>              | yes                   | none found                                           |
| <i>BT4137</i>              | yes                   | none found                                           |
| <i>BT4178</i>              | yes                   | rhamnogalacturonan I                                 |
| <i>BT4182</i>              | yes                   | none found                                           |
| <i>BT4236</i>              | no                    | none found                                           |
| <i>BT4663</i>              | yes                   | heparin                                              |
| <i>BT4673</i>              | yes                   | pectic galactan                                      |
| <b>Non-disrupted HTCS:</b> |                       |                                                      |
| <i>BT2826</i>              | yes                   |                                                      |
| <i>BT2971</i>              | yes                   |                                                      |
| <i>BT3134</i>              | no                    |                                                      |
| <i>BT3660</i>              | no                    |                                                      |
| <i>BT3800</i>              | no                    |                                                      |
| <i>BT3951</i>              | yes                   |                                                      |
| <i>BT3957</i>              | yes                   |                                                      |
