# Supplementary material for: Recognition and Degradation of Plant Cell Wall Polysaccharides by Two Human Gut Symbionts
Source: PubMed Central journal article supplement (PMC3243724; doi:10.1371/journal.pbio.1001221), 2011-12-20
Supplement: pbio.1001221.s013.pdf [file pbio.1001221.s013.pdf]

**Table S4. *B. ovatus* genes with altered expression *in vitro* during growth on plant glycans or in mice fed a plant**

Mean fold differences in expression compared to growth on minimal medium plus glucose

"Sector" designations for each sub-list refer to the Venn diagram in

| Gene                              | Description                                                     | $\beta$ -glucan | Oat spelt<br>xylan | Wheat arabino-<br>xylan | Galacto<br>mannan | Gluco<br>mannan | Xylo<br>glucan | Homogal<br>acturonan | adult plant<br>rich |
|-----------------------------------|-----------------------------------------------------------------|-----------------|--------------------|-------------------------|-------------------|-----------------|----------------|----------------------|---------------------|
| <b>Upregulated:</b>               |                                                                 |                 |                    |                         |                   |                 |                |                      |                     |
| <b>Sector 1 (<i>in vitro</i>)</b> |                                                                 |                 |                    |                         |                   |                 |                |                      |                     |
| BACOVA_00014                      | Predicted Protein                                               |                 |                    |                         | 16.4              |                 |                |                      |                     |
| BACOVA_00032                      | Hypothetical Protein                                            |                 |                    |                         | 10.7              |                 |                |                      |                     |
| BACOVA_00034                      | Hypothetical Protein                                            |                 |                    |                         | 10.4              |                 |                |                      |                     |
| BACOVA_00035                      | Predicted Protein                                               |                 |                    |                         | 11.8              |                 |                |                      |                     |
| BACOVA_00066                      | Predicted Protein                                               |                 |                    |                         | 17.9              |                 |                |                      |                     |
| BACOVA_00068                      | Hypothetical Protein                                            |                 |                    |                         | 10.0              |                 |                |                      |                     |
| BACOVA_00140                      | Similar to 4-deoxy-L-threo-5-hexosulose-uronate ketol-isomerase |                 |                    |                         |                   |                 |                | 17.5                 |                     |
| BACOVA_00242                      | susC-like                                                       |                 |                    |                         |                   |                 |                | 12.5                 |                     |
| BACOVA_00321                      | Hypothetical Protein                                            |                 |                    |                         | 16.0              |                 |                |                      |                     |
| BACOVA_00370                      | Similar to IS116 family transposase                             |                 | 15.7               |                         |                   |                 |                |                      |                     |
| BACOVA_00858                      | Similar to mannonate dehydratase                                |                 |                    |                         |                   |                 |                | 13.0                 |                     |
| BACOVA_00859                      | Similar to D-mannonate oxidoreductase                           |                 |                    |                         |                   |                 |                | 13.7                 |                     |
| BACOVA_00860                      | Conserved Hypothetical Protein                                  |                 |                    |                         |                   |                 |                | 17.3                 |                     |
| BACOVA_00934                      | susC-like                                                       | 77.6            |                    |                         |                   | 17.4            |                |                      |                     |
| BACOVA_00936                      | Predicted Protein                                               | 12.1            |                    |                         |                   |                 |                |                      |                     |
| BACOVA_00938                      | Predicted Protein                                               | 10.3            |                    |                         |                   |                 |                |                      |                     |
| BACOVA_00939                      | Hypothetical Protein                                            | 11.0            |                    |                         |                   |                 |                |                      |                     |
| BACOVA_00940                      | Glycoside hydrolase family 20                                   | 10.5            |                    |                         |                   |                 |                |                      |                     |
| BACOVA_00942                      | susC-like                                                       | 47.6            |                    |                         |                   | 23.2            |                |                      |                     |
| BACOVA_00943                      | susD-like                                                       | 29.8            |                    |                         |                   | 16.3            |                |                      |                     |
| BACOVA_00944                      | Glycoside hydrolase family 30                                   | 35.4            |                    |                         |                   | 21.3            |                |                      |                     |
| BACOVA_00945                      | Hypothetical Protein                                            | 32.4            |                    |                         |                   | 19.4            |                |                      |                     |
| BACOVA_00946                      | Glycoside hydrolase family 3                                    | 15.4            |                    |                         |                   |                 |                |                      |                     |
| BACOVA_01333                      | Similar to mannonate dehydratase                                |                 | 135.0              |                         |                   |                 |                | 11.2                 |                     |
| BACOVA_01497                      | Predicted Protein                                               |                 |                    |                         | 11.6              |                 |                |                      |                     |
| BACOVA_01564                      | Conserved Hypothetical Protein                                  |                 |                    |                         | 33.6              |                 |                |                      |                     |
| BACOVA_01565                      | Conserved Hypothetical Protein                                  |                 |                    |                         | 25.1              |                 |                |                      |                     |
| BACOVA_01619                      | Carbohydrate esterase family 7                                  |                 |                    |                         |                   |                 |                | 17.1                 |                     |
| BACOVA_01707                      | Predicted Protein                                               |                 | 39.9               |                         | 26.6              |                 |                |                      |                     |
| BACOVA_01709                      | Conserved Hypothetical Protein                                  |                 | 56.9               |                         | 41.2              |                 |                |                      |                     |

|              |                                                                                                                  |      |      |       |       |       |
|--------------|------------------------------------------------------------------------------------------------------------------|------|------|-------|-------|-------|
| BACOVA_01711 | Similar to L-arabinose isomerase                                                                                 | 16.3 | 12.1 |       |       |       |
| BACOVA_01712 | Similar to L-ribulose-5-phosphate 4-epimerase                                                                    | 20.3 | 16.1 |       |       |       |
| BACOVA_01713 | Conserved Hypothetical Protein                                                                                   | 30.9 | 24.6 |       |       |       |
| BACOVA_01715 | Similar to aldose 1-epimerase precursor                                                                          | 33.1 | 20.9 |       | 16.8  |       |
| BACOVA_02061 | Glycoside hydrolase family 18                                                                                    |      |      |       | 12.4  |       |
| BACOVA_02064 | susC-like                                                                                                        |      |      |       | 13.7  |       |
| BACOVA_02087 | Predicted Protein                                                                                                |      |      | 184.9 | 77.9  |       |
| BACOVA_02090 | Hypothetical Protein                                                                                             |      |      | 163.2 | 116.9 |       |
| BACOVA_02091 | Glycoside hydrolase family 36                                                                                    |      |      | 169.7 | 111.8 |       |
| BACOVA_02092 | Glycoside hydrolase family 26                                                                                    |      |      | 170.5 | 101.3 |       |
| BACOVA_02093 | Glycoside hydrolase family 26                                                                                    |      |      | 246.9 | 199.8 |       |
| BACOVA_02094 | Hypothetical Protein                                                                                             |      |      | 215.4 | 127.5 |       |
| BACOVA_02095 | susD-like                                                                                                        |      |      | 228.8 | 176.1 |       |
| BACOVA_02097 | Hypothetical Protein                                                                                             |      |      |       | 20.1  |       |
| BACOVA_02237 | Similar to Na <sup>+</sup> -transporting NADH:ubiquinone oxidoreductase, Electron transport complex protein rnfC |      |      |       |       | 10.4  |
| BACOVA_02238 | Similar to Na <sup>+</sup> -transporting NADH:ubiquinone oxidoreductase, Electron transport complex protein rnfD |      |      |       |       | 10.6  |
| BACOVA_02239 | Hypothetical Protein                                                                                             |      |      |       |       | 11.6  |
| BACOVA_02240 | Similar to NADH-ubiquinone oxidoreductase                                                                        |      |      |       |       | 11.8  |
| BACOVA_02356 | Similar to molybdopterin biosynthesis protein                                                                    |      |      |       |       | 12.1  |
| BACOVA_02532 | Conserved Hypothetical Protein                                                                                   | 66.7 | 39.8 |       | 23.8  | 15.7  |
| BACOVA_02533 | Similar to xylulose kinase (xylulokinase)                                                                        | 52.9 | 39.3 |       | 33.2  |       |
| BACOVA_02558 | Similar to UXAC_BACTN Uronate isomerase (Glucuronate isomerase) (Uronic isomerase)                               |      |      |       |       | 22.0  |
| BACOVA_02559 | Similar to transcriptional regulator (LacI family)                                                               |      |      |       |       | 28.2  |
| BACOVA_02560 | Similar to tagaturonate reductase                                                                                |      |      |       |       | 24.7  |
| BACOVA_02644 | Glycoside hydrolase family 3                                                                                     |      |      |       | 185.3 |       |
| BACOVA_02645 | Glycoside hydrolase family 2                                                                                     |      |      |       | 252.4 |       |
| BACOVA_02646 | Glycoside hydrolase family 31                                                                                    |      |      |       | 139.2 |       |
| BACOVA_02647 | Predicted Protein                                                                                                |      |      |       | 22.8  |       |
| BACOVA_02648 | Hypothetical Protein                                                                                             |      |      |       | 19.8  |       |
| BACOVA_02649 | Glycoside hydrolase family 9                                                                                     |      |      |       | 103.8 |       |
| BACOVA_02654 | Glycoside hydrolase family 43                                                                                    |      |      |       | 137.4 |       |
| BACOVA_02655 | Predicted Protein                                                                                                |      |      |       | 118.6 |       |
| BACOVA_02656 | Glycoside hydrolase family 43                                                                                    |      |      |       | 157.2 |       |
| BACOVA_02659 | Glycoside hydrolase family 3                                                                                     |      |      |       | 17.5  | 100.8 |

|              |                                                                                |      |      |      |      |
|--------------|--------------------------------------------------------------------------------|------|------|------|------|
| BACOVA_03088 | Polysaccharide lyase family 10                                                 |      |      |      | 46.7 |
| BACOVA_03170 | Predicted Protein                                                              |      | 22.0 | 15.6 |      |
| BACOVA_03171 | Hypothetical Protein                                                           |      | 18.7 | 14.5 |      |
| BACOVA_03172 | Conserved Hypothetical Protein                                                 |      | 12.3 | 10.9 |      |
| BACOVA_03173 | Conserved Hypothetical Protein                                                 |      | 12.6 |      |      |
| BACOVA_03175 | Hypothetical Protein                                                           |      | 10.4 |      |      |
| BACOVA_03333 | Glycoside hydrolase family 2                                                   |      | 10.3 |      | 18.1 |
| BACOVA_03402 | susD-like                                                                      |      | 13.8 |      |      |
| BACOVA_03406 | Similar to transcriptional regulator                                           |      | 11.3 |      | 12.0 |
| BACOVA_03412 | Conserved Hypothetical Protein                                                 | 17.0 |      |      |      |
| BACOVA_03413 | Conserved Hypothetical Protein                                                 | 12.9 |      |      |      |
| BACOVA_03414 | Similar to fucose permease                                                     | 17.3 |      |      |      |
| BACOVA_03416 | Similar to sorbitol dehydrogenase                                              | 11.4 |      |      |      |
| BACOVA_03419 | Glycoside hydrolase family 3                                                   | 24.2 | 31.2 |      |      |
| BACOVA_03420 | Predicted Protein                                                              | 17.6 | 26.4 |      |      |
| BACOVA_03438 | Glycoside hydrolase family 95                                                  |      | 39.3 |      |      |
| BACOVA_03440 | Predicted Protein                                                              | 18.0 | 57.4 |      |      |
| BACOVA_03443 | susC-like                                                                      | 24.1 | 12.3 |      |      |
| BACOVA_03444 | susD-like                                                                      | 13.8 |      |      |      |
| BACOVA_03445 | Predicted Protein                                                              | 20.0 |      |      |      |
| BACOVA_03446 | Predicted Protein                                                              | 32.3 |      |      |      |
| BACOVA_03447 | Predicted Protein                                                              | 17.0 |      |      |      |
| BACOVA_03448 | Predicted Protein                                                              |      | 16.4 |      |      |
| BACOVA_03484 | Glycoside hydrolase family 97                                                  | 10.8 |      |      |      |
| BACOVA_03520 | Glycoside hydrolase family 13                                                  |      |      |      | 50.9 |
| BACOVA_03829 | Similar to keto-hydroxyglutarate-aldolase/keto-deoxy-phosphogluconate aldolase |      |      |      | 16.7 |
| BACOVA_03830 | Similar to 2-dehydro-3-deoxygluconokinase                                      |      |      |      | 16.5 |
| BACOVA_03831 | Similar to transcriptional regulator                                           |      |      |      | 12.8 |
| BACOVA_03832 | Similar to altronate hydrolase                                                 |      |      |      | 25.8 |
| BACOVA_03967 | Conserved Hypothetical Protein                                                 |      |      |      | 12.3 |
| BACOVA_04265 | Predicted Protein                                                              |      | 18.5 |      |      |
| BACOVA_04266 | Conserved Hypothetical Protein                                                 |      | 20.8 |      |      |
| BACOVA_04271 | Hypothetical Protein                                                           |      | 12.8 |      |      |
| BACOVA_04272 | Hypothetical Protein                                                           |      | 20.8 |      |      |
| BACOVA_04273 | Similar to ABC transporter ATP-binding protein                                 |      | 15.1 |      |      |
| BACOVA_04274 | Similar to ABC transporter permease                                            |      | 22.2 |      |      |
| BACOVA_04311 | Predicted Protein                                                              |      |      |      | 11.6 |

|              |                                                                    |      |      |      |       |
|--------------|--------------------------------------------------------------------|------|------|------|-------|
| BACOVA_04312 | Similar to RNA polymerase ECF-type sigma factor                    |      |      |      | 17.3  |
| BACOVA_04315 | Hypothetical Protein                                               |      |      |      | 21.2  |
| BACOVA_04384 | Predicted Protein                                                  | 27.0 | 15.3 |      |       |
| BACOVA_04896 | Similar to hexuronate transporter                                  | 12.1 |      |      | 38.8  |
| BACOVA_04900 | Glycoside hydrolase family 105                                     |      |      |      | 104.2 |
| BACOVA_04901 | Carbohydrate esterase family 8                                     |      |      |      | 108.6 |
| BACOVA_04902 | Carbohydrate esterase family 12-<br>Carbohydrate esterase family 8 |      |      |      | 53.4  |
| BACOVA_04903 | Predicted Protein                                                  |      |      |      | 62.2  |
| BACOVA_04905 | Polysaccharide lyase family 1                                      |      |      |      | 30.6  |
| BACOVA_04906 | Polysaccharide lyase family 1                                      |      |      |      | 381.5 |
| BACOVA_04907 | Polysaccharide lyase family 1                                      |      |      |      | 482.9 |
| BACOVA_04908 | Carbohydrate esterase family 8                                     |      |      |      | 316.1 |
| BACOVA_04909 | Predicted Protein                                                  |      |      |      | 164.5 |
| BACOVA_04910 | susD-like                                                          |      |      |      | 224.1 |
| BACOVA_04916 | Polysaccharide lyase family 1                                      |      |      |      | 27.4  |
| BACOVA_04982 | Hypothetical Protein                                               |      |      |      | 10.1  |
| BACOVA_05018 | Predicted Protein                                                  |      | 11.8 |      |       |
| BACOVA_05037 | Glycoside hydrolase family 43                                      |      |      |      | 69.3  |
| BACOVA_05039 | Conserved Hypothetical Protein                                     |      |      |      | 10.5  |
| BACOVA_05040 | Glycoside hydrolase family 28                                      |      |      |      | 251.9 |
| BACOVA_05176 | Hypothetical Protein                                               |      |      |      | 14.4  |
| BACOVA_05203 | Hypothetical Protein                                               |      |      |      | 13.7  |
| BACOVA_05541 | Hypothetical Protein                                               |      | 14.8 |      |       |
| BACOVA_05601 | Similar to NADH-ubiquinone oxidoreductase subunit                  |      |      | 21.6 |       |
| BACOVA_05603 | Similar to NADH:ubiquinone oxidoreductase subunit                  |      |      | 14.0 |       |

**Sector 2 (in vitro, in vivo shared)**

|              |                                                                         |      |      |      |       |
|--------------|-------------------------------------------------------------------------|------|------|------|-------|
| BACOVA_00030 | Conserved Hypothetical Protein                                          |      |      | 12.5 | 176.1 |
| BACOVA_00035 | Predicted Protein                                                       |      |      | 14.7 | 10.0  |
| BACOVA_00557 | susD-like                                                               | 10.1 |      | 18.2 | 19.3  |
| BACOVA_00558 | susC-like                                                               |      | 12.3 | 18.1 | 23.0  |
| BACOVA_00725 | Conserved Hypothetical Protein                                          |      |      | 11.3 | 15.0  |
| BACOVA_00876 | Similar to biotin carboxyl carrier protein                              |      |      | 13.4 | 32.2  |
| BACOVA_00877 | Similar to biotin carboxylase                                           | 11.3 | 10.7 | 20.8 | 41.4  |
| BACOVA_01282 | Similar to tRNA (5-methylaminomethyl-2-thiouridylate)-methyltransferase |      | 42.7 |      | 22.7  |

|              |                                                             |       |       |       |       |       |       |       |
|--------------|-------------------------------------------------------------|-------|-------|-------|-------|-------|-------|-------|
| BACOVA_01331 | Similar to D-mannonate oxidoreductase                       |       | 127.4 |       |       |       | 11.9  | 10.8  |
| BACOVA_01708 | Glycoside hydrolase family 51                               |       | 69.2  | 47.4  |       |       | 13.4  | 16.7  |
| BACOVA_01710 | Similar to xylulose kinase (xylulokinase)                   |       | 34.2  | 27.1  |       |       |       | 13.8  |
| BACOVA_01714 | Similar to Na <sup>+</sup> /glucose cotransporter           |       | 41.1  | 29.7  |       |       | 13.2  | 12.1  |
| BACOVA_01889 | Hypothetical Protein                                        |       | 18.9  | 21.7  |       | 22.8  | 35.7  | 12.6  |
| BACOVA_02052 | susD-like                                                   |       | 12.9  |       |       |       |       | 59.4  |
| BACOVA_02054 | Hypothetical Protein                                        |       | 12.1  |       |       |       |       | 56.7  |
| BACOVA_02055 | Hypothetical Protein                                        | 39.5  | 157.0 | 10.6  |       | 70.6  | 16.4  | 822.2 |
| BACOVA_02058 | Hypothetical Protein                                        |       | 15.9  |       |       |       |       | 88.9  |
| BACOVA_02059 | Predicted Protein                                           |       | 27.7  |       |       | 10.9  |       | 145.0 |
| BACOVA_02088 | Hypothetical Protein                                        |       |       |       | 237.3 | 126.2 |       | 12.0  |
| BACOVA_02089 | Hypothetical Protein                                        |       |       |       | 411.7 | 248.3 |       | 17.7  |
| BACOVA_02096 | susC-like                                                   |       |       |       | 631.9 | 529.6 |       | 15.5  |
| BACOVA_02526 | Similar to succinyl-CoA synthetase alpha chain              | 16.9  | 24.1  | 18.6  |       | 34.0  |       | 28.8  |
| BACOVA_02527 | Similar to succinyl-CoA synthetase beta chain               | 11.3  | 15.4  | 13.9  |       | 22.8  |       | 21.0  |
| BACOVA_02534 | Similar to xylose isomerase                                 |       | 42.9  | 32.8  |       |       | 30.9  | 10.6  |
| BACOVA_02535 | Similar to D-xylose-proton symporter (D-xylose transporter) |       | 65.7  | 32.7  |       |       | 37.7  | 11.4  |
| BACOVA_02601 | Similar to RNA polymerase ECF-type sigma factor             |       |       |       | 11.5  |       |       | 16.3  |
| BACOVA_02629 | Hypothetical Protein                                        |       |       |       |       | 11.5  |       | 81.2  |
| BACOVA_02650 | Predicted Protein                                           |       |       |       |       |       | 303.3 | 25.9  |
| BACOVA_02651 | susD-like                                                   |       |       |       |       |       | 161.5 | 12.8  |
| BACOVA_02652 | susC-like                                                   |       |       |       |       |       | 289.7 | 18.6  |
| BACOVA_02653 | Glycoside hydrolase family 5                                |       |       |       |       |       | 183.7 | 14.9  |
| BACOVA_02741 | Glycoside hydrolase family 16                               | 228.8 |       |       |       | 14.5  |       | 149.7 |
| BACOVA_02742 | susC-like                                                   | 259.7 |       |       |       | 14.8  |       | 147.3 |
| BACOVA_02743 | susD-like                                                   | 124.9 |       |       |       |       |       | 70.7  |
| BACOVA_02744 | Predicted Protein                                           | 298.3 |       |       |       | 17.9  |       | 204.3 |
| BACOVA_02745 | Glycoside hydrolase family 3                                | 180.7 |       |       |       | 12.1  |       | 79.9  |
| BACOVA_02746 | Hypothetical Protein                                        | 232.8 |       |       |       | 17.8  |       | 123.6 |
| BACOVA_02747 | Predicted Protein                                           | 156.5 |       |       |       | 13.3  |       | 111.9 |
| BACOVA_02771 | Similar to cysteine synthase A                              |       |       |       | 21.6  |       | 17.5  | 17.6  |
| BACOVA_03178 | Similar to elongation factor G                              | 11.8  | 22.4  | 17.1  |       | 24.9  | 22.9  | 26.7  |
| BACOVA_03415 | Similar to fucose permease                                  |       | 16.9  |       |       |       |       | 21.6  |
| BACOVA_03417 | Glycoside hydrolase family 43                               |       | 48.2  | 106.3 |       |       |       | 24.0  |
| BACOVA_03421 | TM-Glycoside hydrolase family 43                            |       | 71.3  | 103.4 |       |       |       | 25.4  |
| BACOVA_03422 | Glycoside hydrolase family 31                               |       | 79.2  | 150.4 |       |       |       | 39.0  |
| BACOVA_03423 | Glycoside hydrolase family 97                               |       | 109.5 | 186.4 |       |       |       | 52.8  |

|              |                                                               |       |       |       |       |
|--------------|---------------------------------------------------------------|-------|-------|-------|-------|
| BACOVA_03424 | Glycoside hydrolase family 43-Carbohydrate binding module 6   | 271.8 | 364.1 |       | 98.8  |
| BACOVA_03425 | TM-Glycoside hydrolase family 43                              | 163.2 | 263.9 |       | 98.0  |
| BACOVA_03426 | susC-like                                                     | 356.5 | 417.3 |       | 149.9 |
| BACOVA_03427 | susD-like                                                     | 186.9 | 227.4 |       | 83.0  |
| BACOVA_03428 | susC-like                                                     | 107.4 | 124.8 |       | 56.5  |
| BACOVA_03429 | susD-like                                                     | 111.3 | 138.7 |       | 57.8  |
| BACOVA_03430 | Predicted Protein                                             | 169.9 | 184.8 |       | 96.2  |
| BACOVA_03431 | Glycoside hydrolase family 10                                 | 84.9  | 90.1  |       | 47.7  |
| BACOVA_03432 | Glycoside hydrolase family 5                                  | 92.9  | 124.5 |       | 44.8  |
| BACOVA_03433 | Glycoside hydrolase family 98-Carbohydrate binding module 35  | 65.3  | 95.6  |       | 32.0  |
| BACOVA_03434 | Glycoside Hydrolase Family 115                                | 89.8  | 120.1 |       | 23.1  |
| BACOVA_03435 | Carbohydrate esterase family6-Carbohydrate esterase family 1  | 52.2  | 64.3  |       | 14.3  |
| BACOVA_03436 | Glycoside hydrolase family 43-Carbohydrate binding module 6   | 95.7  | 139.5 |       | 33.4  |
| BACOVA_03437 | Hypothetical Protein                                          | 17.4  | 19.7  |       | 15.2  |
| BACOVA_03449 | Glycoside Hydrolase Family 115                                | 36.6  | 81.4  |       | 25.4  |
| BACOVA_03450 | Carbohydrate esterase family 6-Carbohydrate esterase family 6 | 36.6  | 155.1 |       | 27.4  |
| BACOVA_03483 | Glycoside hydrolase family 51                                 | 14.5  | 10.0  |       | 10.6  |
| BACOVA_03514 | Glycoside hydrolase family 13                                 | 31.9  |       | 146.4 | 34.8  |
| BACOVA_03515 | Hypothetical Protein                                          | 41.8  |       | 176.3 | 46.5  |
| BACOVA_03516 | Hypothetical Protein                                          | 14.5  |       | 72.0  | 15.8  |
| BACOVA_03517 | susD-like                                                     | 17.2  |       | 90.8  | 20.3  |
| BACOVA_03518 | susC-like                                                     | 16.4  |       | 84.3  | 20.4  |
| BACOVA_03519 | Glycoside hydrolase family 97                                 | 15.1  |       | 144.9 | 27.9  |
| BACOVA_03965 | Similar to outer membrane efflux protein                      | 28.6  |       |       | 12.4  |
| BACOVA_04103 | susC-like                                                     |       |       | 10.3  | 207.1 |
| BACOVA_04111 | Glycoside hydrolase family 92                                 |       |       | 10.6  | 66.4  |
| BACOVA_04134 | Similar to propionyl-CoA carboxylase beta chain               |       |       | 11.1  | 28.8  |
| BACOVA_04385 | Glycoside hydrolase family 67                                 | 413.2 | 339.7 |       | 12.5  |
| BACOVA_04386 | Glycoside hydrolase family 43                                 | 158.1 | 160.9 |       | 51.7  |
| BACOVA_04387 | Glycoside hydrolase family 10                                 | 207.8 | 184.3 |       | 53.7  |
| BACOVA_04388 | Hypothetical Protein                                          | 189.5 | 153.8 |       | 44.5  |
| BACOVA_04389 | Carbohydrate esterase family 6-Carbohydrate esterase family 6 | 298.4 | 240.7 |       | 10.1  |
|              |                                                               |       |       |       | 65.8  |

|              |                                                                                           |        |       |      |      |       |       |
|--------------|-------------------------------------------------------------------------------------------|--------|-------|------|------|-------|-------|
| BACOVA_04390 | Glycoside hydrolase family10-Carbohydrate binding module 22-Glycoside hydrolase family 10 | 1706.9 | 886.6 | 13.1 | 11.5 | 98.6  | 305.0 |
| BACOVA_04391 | Hypothetical Protein                                                                      | 180.9  | 82.4  |      |      |       | 25.4  |
| BACOVA_04392 | susD-like                                                                                 | 235.3  | 95.5  |      |      | 14.3  | 36.5  |
| BACOVA_04393 | susC-like                                                                                 | 311.6  | 122.7 |      |      | 13.9  | 42.8  |
| BACOVA_04500 | Similar to glucose/galactose transporter                                                  |        |       | 20.9 |      | 60.6  | 145.9 |
| BACOVA_04501 | Glycoside hydrolase family 32                                                             |        |       |      |      | 20.6  | 39.3  |
| BACOVA_04502 | Glycoside hydrolase family 91                                                             |        |       |      |      | 31.7  | 81.4  |
| BACOVA_04503 | Glycoside hydrolase family 91                                                             |        |       |      |      | 17.4  | 41.6  |
| BACOVA_04504 | susD-like                                                                                 |        |       |      |      | 12.0  | 25.0  |
| BACOVA_04505 | susC-like                                                                                 |        |       |      |      | 25.3  | 44.0  |
| BACOVA_04507 | Glycoside hydrolase family 32                                                             |        |       |      |      | 34.7  | 25.5  |
| BACOVA_04622 | Predicted Protein                                                                         | 10.8   |       |      |      |       | 28.1  |
| BACOVA_04623 | Predicted Protein                                                                         | 12.6   |       |      |      |       | 26.1  |
| BACOVA_04911 | susC-like                                                                                 |        |       |      |      | 283.4 | 10.2  |
| BACOVA_05038 | Predicted Protein                                                                         |        |       |      |      | 61.3  | 10.5  |
| BACOVA_05488 | Glycoside hydrolase family 53                                                             |        |       |      |      | 64.7  | 81.0  |
| BACOVA_05489 | Hypothetical Protein                                                                      |        |       |      |      | 47.2  | 62.6  |
| BACOVA_05490 | susD-like                                                                                 |        |       |      |      | 47.7  | 80.5  |
| BACOVA_05491 | susC-like                                                                                 |        |       |      |      | 287.8 | 541.9 |
| BACOVA_05493 | Glycoside hydrolase family 5                                                              |        |       |      |      | 23.2  | 43.3  |
| BACOVA_05542 | susC-like                                                                                 |        | 14.0  |      |      |       | 19.0  |
| BACOVA_05543 | susD-like                                                                                 |        | 15.7  |      |      |       | 27.7  |
| BACOVA_05544 | Hypothetical Protein                                                                      |        | 30.6  |      |      | 14.7  | 75.9  |
| BACOVA_05561 | Glycoside hydrolase family 18                                                             |        |       | 10.9 |      |       | 14.3  |
| BACOVA_05563 | Hypothetical Protein                                                                      | 10.7   |       | 20.7 |      | 13.6  | 30.2  |
| BACOVA_05602 | Similar to NADH:ubiquinone oxidoreductase subunit                                         | 15.8   |       | 36.3 |      | 10.1  | 12.4  |

### Sector 3 (*in vivo* only)

|              |                                                      |  |  |  |  |  |      |
|--------------|------------------------------------------------------|--|--|--|--|--|------|
| BACOVA_00016 | Conserved Hypothetical Protein                       |  |  |  |  |  | 30.7 |
| BACOVA_00092 | Similar to catalase                                  |  |  |  |  |  | 11.9 |
| BACOVA_00108 | Conserved Hypothetical Protein                       |  |  |  |  |  | 12.5 |
| BACOVA_00109 | Conserved Hypothetical Protein                       |  |  |  |  |  | 11.4 |
| BACOVA_00112 | Conserved Hypothetical Protein                       |  |  |  |  |  | 13.4 |
| BACOVA_00116 | Similar to glutamate/gamma-aminobutyrate anti-porter |  |  |  |  |  | 17.8 |
| BACOVA_00238 | Predicted Protein                                    |  |  |  |  |  | 13.1 |
| BACOVA_00365 | Predicted Protein                                    |  |  |  |  |  | 11.4 |
| BACOVA_00505 | Predicted Protein                                    |  |  |  |  |  | 10.4 |

|              |                                                              |       |
|--------------|--------------------------------------------------------------|-------|
| BACOVA_00559 | Glycoside hydrolase family 20-Carbohydrate binding module 32 | 10.1  |
| BACOVA_00560 | Glycoside hydrolase family 20-Carbohydrate binding module 32 | 16.5  |
| BACOVA_00591 | Conserved Hypothetical Protein                               | 12.6  |
| BACOVA_00597 | Conserved Hypothetical Protein                               | 10.1  |
| BACOVA_00746 | Conserved Hypothetical Protein                               | 13.7  |
| BACOVA_00801 | Hypothetical Protein                                         | 18.2  |
| BACOVA_00802 | Hypothetical Protein                                         | 40.9  |
| BACOVA_00991 | Similar to histidine ammonia-lyase                           | 19.0  |
| BACOVA_00992 | Similar to methenyltetrahydrofolate cyclohydrolase           | 24.0  |
| BACOVA_00993 | Similar to imidazolonepropionase                             | 14.1  |
| BACOVA_00994 | Similar to formiminotransferase-cyclodeaminase               | 18.6  |
| BACOVA_00995 | Similar to urocanate hydratase                               | 19.0  |
| BACOVA_01069 | Similar to aspartate ammonia-lyase                           | 12.1  |
| BACOVA_01071 | Similar to L-asparaginase II precursor                       | 16.1  |
| BACOVA_01072 | Conserved Hypothetical Protein                               | 26.8  |
| BACOVA_01270 | Conserved Hypothetical Protein                               | 17.8  |
| BACOVA_01290 | Conserved Hypothetical Protein                               | 15.7  |
| BACOVA_01329 | Similar to oxidoreductase, aldo/keto reductase               | 12.3  |
| BACOVA_01355 | Conserved Hypothetical Protein                               | 92.8  |
| BACOVA_01415 | Predicted Protein                                            | 31.0  |
| BACOVA_01467 | Hypothetical Protein                                         | 13.5  |
| BACOVA_01476 | Conserved Hypothetical Protein                               | 12.4  |
| BACOVA_01482 | Hypothetical Protein                                         | 10.7  |
| BACOVA_01654 | Similar to flavodoxin                                        | 10.2  |
| BACOVA_01792 | Hypothetical Protein                                         | 65.8  |
| BACOVA_01793 | Conserved Hypothetical Protein                               | 113.3 |
| BACOVA_01794 | Similar to arabinose-proton symporter                        | 52.7  |
| BACOVA_01795 | Similar to N-acylglucosamine 2-epimerase                     | 99.2  |
| BACOVA_01796 | susC-like                                                    | 99.8  |
| BACOVA_01797 | susD-like                                                    | 105.7 |
| BACOVA_01798 | Conserved Hypothetical Protein                               | 105.0 |
| BACOVA_01799 | Hypothetical Protein                                         | 53.6  |
| BACOVA_01800 | Conserved Hypothetical Protein                               | 85.7  |
| BACOVA_01801 | Conserved Hypothetical Protein                               | 49.4  |
| BACOVA_01802 | Carbohydrate esterase family6                                | 45.7  |
| BACOVA_01803 | Conserved Hypothetical Protein                               | 83.5  |



|              |                                                                  |       |
|--------------|------------------------------------------------------------------|-------|
| BACOVA_01807 | Hypothetical Protein                                             | 26.5  |
| BACOVA_01808 | Carbohydrate esterase family 6                                   | 35.5  |
| BACOVA_01809 | Hypothetical Protein                                             | 73.1  |
| BACOVA_01810 | Predicted Protein                                                | 27.4  |
| BACOVA_01811 | Predicted Protein                                                | 48.4  |
| BACOVA_01812 | Predicted Protein                                                | 64.8  |
| BACOVA_01813 | Hypothetical Protein                                             | 113.7 |
| BACOVA_01814 | susD-like                                                        | 37.7  |
| BACOVA_01815 | susC-like                                                        | 87.2  |
| BACOVA_01816 | Similar to N-acylglucosamine 2-epimerase                         | 77.4  |
| BACOVA_01818 | Similar to arabinose-proton symporter                            | 65.4  |
| BACOVA_01819 | Conserved Hypothetical Protein                                   | 62.5  |
| BACOVA_01893 | Similar to pyrophosphate-energized vacuolar membrane proton pump | 10.6  |
| BACOVA_01895 | Hypothetical Protein                                             | 88.1  |
| BACOVA_01896 | Glycoside hydrolase family 36                                    | 17.0  |
| BACOVA_02051 | susC-like                                                        | 34.1  |
| BACOVA_02053 | Hypothetical Protein                                             | 10.6  |
| BACOVA_02056 | Carbohydrate esterase family 1                                   | 34.3  |
| BACOVA_02057 | Carbohydrate esterase family 1                                   | 49.8  |
| BACOVA_02168 | Hypothetical Protein                                             | 10.3  |
| BACOVA_02174 | susD-like                                                        | 17.1  |
| BACOVA_02175 | susC-like                                                        | 13.0  |
| BACOVA_02205 | Similar to RNA polymerase ECF-type sigma factor                  | 26.5  |
| BACOVA_02364 | Hypothetical Protein                                             | 27.3  |
| BACOVA_02442 | Conserved Hypothetical Protein                                   | 10.9  |
| BACOVA_02495 | Hypothetical Protein                                             | 16.3  |
| BACOVA_02504 | Hypothetical Protein                                             | 17.1  |
| BACOVA_02539 | Conserved Hypothetical Protein                                   | 18.2  |
| BACOVA_02602 | Similar to RNA polymerase ECF-type sigma factor                  | 17.5  |
| BACOVA_02626 | Glycoside hydrolase family 5                                     | 36.2  |
| BACOVA_02627 | susC-like                                                        | 64.3  |
| BACOVA_02628 | susD-like                                                        | 34.0  |
| BACOVA_02630 | Glycoside hydrolase family 5                                     | 23.1  |
| BACOVA_02631 | Glycoside hydrolase family 2                                     | 14.5  |
| BACOVA_02632 | Glycoside hydrolase family 5                                     | 19.3  |
| BACOVA_02634 | Hypothetical Protein                                             | 11.5  |
| BACOVA_02635 | Hypothetical Protein                                             | 10.6  |
| BACOVA_02636 | Glycoside hydrolase family 78                                    | 10.0  |

|              |                                                     |       |
|--------------|-----------------------------------------------------|-------|
| BACOVA_02663 | Hypothetical Protein                                | 19.5  |
| BACOVA_02664 | susD-like                                           | 11.3  |
| BACOVA_02665 | susC-like                                           | 12.3  |
| BACOVA_02690 | Similar to pyruvate carboxylase subunit B)          | 15.1  |
| BACOVA_02976 | Predicted Protein                                   | 15.8  |
| BACOVA_03020 | Similar to L-asparaginase I                         | 10.1  |
| BACOVA_03027 | Predicted Protein                                   | 14.4  |
| BACOVA_03089 | Conserved Hypothetical Protein                      | 11.1  |
| BACOVA_03090 | Similar to multidrug efflux membrane fusion protein | 11.8  |
| BACOVA_03130 | Hypothetical Protein                                | 17.1  |
| BACOVA_03131 | Hypothetical Protein                                | 31.2  |
| BACOVA_03153 | susD-like                                           | 80.5  |
| BACOVA_03154 | susC-like                                           | 28.8  |
| BACOVA_03190 | Conserved Hypothetical Protein                      | 10.7  |
| BACOVA_03262 | Hypothetical Protein                                | 43.3  |
| BACOVA_03263 | Hypothetical Protein                                | 97.7  |
| BACOVA_03264 | Hypothetical Protein                                | 116.2 |
| BACOVA_03265 | Hypothetical Protein                                | 16.4  |
| BACOVA_03294 | Similar to choloylglycine hydrolase                 | 10.8  |
| BACOVA_03335 | Predicted Protein                                   | 15.0  |
| BACOVA_03379 | Conserved Hypothetical Protein                      | 14.4  |
| BACOVA_03380 | Glycoside hydrolase family 3                        | 16.6  |
| BACOVA_03381 | susD-like                                           | 19.3  |
| BACOVA_03382 | susC-like                                           | 18.4  |
| BACOVA_03485 | Hypothetical Protein                                | 11.6  |
| BACOVA_03556 | susC-like                                           | 22.2  |
| BACOVA_03557 | susD-like                                           | 26.1  |
| BACOVA_03558 | Glycoside hydrolase family 18                       | 21.2  |
| BACOVA_03559 | Hypothetical Protein                                | 22.2  |
| BACOVA_03579 | susD-like                                           | 17.0  |
| BACOVA_03580 | Hypothetical Protein                                | 10.8  |
| BACOVA_03601 | Similar to rhamnulose kinase/L-fuculose kinase      | 13.7  |
| BACOVA_03602 | Similar to L-rhamnose isomerase                     | 33.0  |
| BACOVA_03603 | Similar to L-rhamnose/H+ symporter                  | 22.1  |
| BACOVA_03625 | Predicted Protein                                   | 12.4  |
| BACOVA_03641 | Predicted Protein                                   | 11.1  |
| BACOVA_03667 | Conserved Hypothetical Protein                      | 27.5  |
| BACOVA_03761 | Hypothetical Protein                                | 20.6  |
| BACOVA_03769 | Similar to polyphosphate kinase                     | 12.0  |

|              |                                                                               |       |
|--------------|-------------------------------------------------------------------------------|-------|
| BACOVA_03770 | Conserved Hypothetical Protein                                                | 11.0  |
| BACOVA_03810 | Glycoside hydrolase family 20                                                 | 10.8  |
| BACOVA_03843 | Conserved Hypothetical Protein                                                | 10.0  |
| BACOVA_03864 | Hypothetical Protein                                                          | 16.9  |
| BACOVA_04005 | Hypothetical Protein                                                          | 20.9  |
| BACOVA_04094 | Predicted Protein                                                             | 44.6  |
| BACOVA_04095 | Hypothetical Protein                                                          | 35.5  |
| BACOVA_04096 | Hypothetical Protein                                                          | 21.6  |
| BACOVA_04097 | Glycoside hydrolase family 18                                                 | 29.9  |
| BACOVA_04098 | susD-like                                                                     | 17.1  |
| BACOVA_04099 | susC-like                                                                     | 26.1  |
| BACOVA_04104 | susD-like                                                                     | 147.8 |
| BACOVA_04105 | Glycoside hydrolase family 18                                                 | 131.0 |
| BACOVA_04106 | Hypothetical Protein                                                          | 130.7 |
| BACOVA_04107 | Hypothetical Protein                                                          | 113.8 |
| BACOVA_04108 | Carbohydrate binding module 32                                                | 29.5  |
| BACOVA_04109 | Conserved Hypothetical Protein                                                | 31.0  |
| BACOVA_04110 | Conserved Hypothetical Protein                                                | 55.6  |
| BACOVA_04131 | Hypothetical Protein                                                          | 39.3  |
| BACOVA_04132 | Hypothetical Protein                                                          | 29.4  |
| BACOVA_04136 | Conserved Hypothetical Protein                                                | 10.3  |
| BACOVA_04138 | Similar to L-lactate permease                                                 | 11.1  |
| BACOVA_04222 | Similar to tyrosine phenol-lyase                                              | 12.2  |
| BACOVA_04235 | Predicted Protein                                                             | 15.9  |
| BACOVA_04297 | Similar to alanine dehydrogenase                                              | 10.3  |
| BACOVA_04314 | Conserved Hypothetical Protein                                                | 17.3  |
| BACOVA_04408 | Hypothetical Protein                                                          | 12.7  |
| BACOVA_04497 | Predicted Protein                                                             | 14.7  |
| BACOVA_04565 | Similar to pyruvate dehydrogenase                                             | 11.7  |
| BACOVA_04684 | Conserved Hypothetical Protein                                                | 32.8  |
| BACOVA_04700 | Hypothetical Protein                                                          | 10.0  |
| BACOVA_04701 | Hypothetical Protein                                                          | 26.2  |
| BACOVA_04702 | Hypothetical Protein                                                          | 56.3  |
| BACOVA_04703 | Similar to Fe <sup>3+</sup> ABC transporter, permease protein                 | 24.2  |
| BACOVA_04704 | Similar to Fe <sup>3+</sup> ABC transporter, periplasmic iron-binding protein | 27.7  |
| BACOVA_04705 | Hypothetical Protein                                                          | 19.7  |
| BACOVA_04706 | Hypothetical Protein                                                          | 27.3  |
| BACOVA_04707 | Hypothetical Protein                                                          | 45.1  |
| BACOVA_04708 | Hypothetical Protein                                                          | 43.6  |

|              |                                |       |
|--------------|--------------------------------|-------|
| BACOVA_04735 | Predicted Protein              | 19.7  |
| BACOVA_04786 | Hypothetical Protein           | 15.2  |
| BACOVA_04799 | Predicted Protein              | 298.5 |
| BACOVA_04800 | Glycoside hydrolase family 18  | 254.1 |
| BACOVA_04801 | Hypothetical Protein           | 189.1 |
| BACOVA_04802 | Glycoside hydrolase family 18  | 108.3 |
| BACOVA_04803 | susD-like                      | 134.2 |
| BACOVA_04804 | susC-like                      | 73.6  |
| BACOVA_04805 | Hypothetical Protein           | 31.5  |
| BACOVA_04806 | Hypothetical Protein           | 19.6  |
| BACOVA_04807 | Glycoside hydrolase family 18  | 25.5  |
| BACOVA_04808 | Hypothetical Protein           | 17.1  |
| BACOVA_04809 | Glycoside hydrolase family 92  | 13.1  |
| BACOVA_04810 | Glycoside hydrolase family 92  | 10.3  |
| BACOVA_04811 | Hypothetical Protein           | 12.2  |
| BACOVA_04851 | Predicted Protein              | 15.4  |
| BACOVA_04960 | Predicted Protein              | 15.3  |
| BACOVA_04974 | Polysaccharide lyase family 11 | 27.1  |
| BACOVA_04975 | Glycoside hydrolase family 105 | 16.7  |
| BACOVA_04976 | Conserved Hypothetical Protein | 17.7  |
| BACOVA_05006 | Hypothetical Protein           | 13.6  |
| BACOVA_05024 | Predicted Protein              | 38.2  |
| BACOVA_05031 | Glycoside hydrolase family 105 | 12.4  |
| BACOVA_05125 | Predicted Protein              | 10.6  |
| BACOVA_05295 | Conserved Hypothetical Protein | 11.9  |
| BACOVA_05305 | Conserved Hypothetical Protein | 11.5  |
| BACOVA_05351 | Predicted Protein              | 25.1  |
| BACOVA_05401 | Conserved Hypothetical Protein | 31.0  |
| BACOVA_05433 | Hypothetical Protein           | 31.2  |
| BACOVA_05503 | Predicted Protein              | 10.0  |
| BACOVA_05559 | susC-like                      | 12.2  |
| BACOVA_05560 | susD-like                      | 12.2  |
| BACOVA_05564 | Hypothetical Protein           | 10.5  |
| BACOVA_05569 | Hypothetical Protein           | 11.9  |

**Downregulated:**

**Sector 1**

|              |                                |      |      |      |
|--------------|--------------------------------|------|------|------|
| BACOVA_01128 | Conserved Hypothetical Protein |      |      | 10.8 |
| BACOVA_01198 | susC                           | 36.6 | 17.0 | 36.0 |
| BACOVA_01199 | susD                           | 12.5 |      |      |

|                 |                                                        |      |       |      |       |
|-----------------|--------------------------------------------------------|------|-------|------|-------|
| BACOVA_02195    | Similar to transcriptional regulator                   |      | 11.6  |      |       |
| BACOVA_02732    | Hypothetical Protein                                   | 13.2 |       |      |       |
| BACOVA_02733    | Hypothetical Protein                                   | 17.4 |       |      |       |
| BACOVA_02734    | Predicted Protein                                      | 12.3 |       |      |       |
| BACOVA_02735    | Hypothetical Protein                                   | 12.7 |       |      |       |
| BACOVA_02814    | Conserved Hypothetical Protein                         | 10.0 | 18.6  | 18.4 |       |
| BACOVA_02953    | Predicted Protein                                      |      |       | 16.6 | 10.8  |
| BACOVA_02953    | Predicted Protein                                      |      |       | 15.7 |       |
| BACOVA_03637    | Predicted Protein                                      |      |       |      | 23.1  |
| BACOVA_03722    | Similar to small heat shock protein                    |      |       |      | 12.4  |
| BACOVA_03757    | Similar to glutamate synthase, small subunit           | 23.7 |       |      |       |
| BACOVA_03765    | Similar to nitrogen regulatory protein P-II            | 10.2 |       |      |       |
| BACOVA_03767    | Similar to glutamine synthetase                        |      | 10.6  |      |       |
| BACOVA_04836    | Predicted Protein                                      |      | 11.3  |      |       |
| <b>Sector 2</b> |                                                        |      |       |      |       |
| BACOVA_02729    | susC                                                   | 12.5 | 14.8  |      | 12.8  |
| BACOVA_02028    | Predicted Protein                                      | 11.9 | 19.2  |      | 10.9  |
| BACOVA_02730    | susD                                                   | 10.0 |       |      | 16.2  |
| BACOVA_02382    | Similar to cation efflux system protein czcB           |      | 390.6 |      | 55.2  |
| BACOVA_02381    | Similar to cation efflux system protein czcC           |      | 123.3 |      | 39.3  |
| BACOVA_02383    | Similar to cation efflux system protein czcA           |      | 73.5  |      | 50.8  |
| BACOVA_00178    | Similar to Mg <sup>2+</sup> transport ATPase protein B |      | 20.5  |      | 553.6 |
| BACOVA_02194    | Hypothetical Protein                                   |      | 14.8  |      | 12.5  |
| BACOVA_04142    | Hypothetical Protein                                   |      | 14.0  |      | 27.6  |
| BACOVA_04144    | Similar to protein rtcB                                |      | 12.0  |      | 18.1  |
| BACOVA_04143    | Hypothetical Protein                                   |      | 10.4  |      | 32.9  |
| BACOVA_03166    | Conserved Hypothetical Protein                         |      |       | 22.2 | 17.8  |
| BACOVA_03813    | Similar to TonB-dependent outer membrane receptor      |      |       | 10.2 | 19.1  |
| <b>Sector 3</b> |                                                        |      |       |      |       |
| BACOVA_04528    | Hypothetical Protein                                   |      |       |      | 299.4 |
| BACOVA_01521    | Conserved Hypothetical Protein                         |      |       |      | 93.5  |
| BACOVA_03780    | Similar to anthranilate synthase component I           |      |       |      | 72.6  |
| BACOVA_04530    | Conserved Hypothetical Protein                         |      |       |      | 47.6  |
| BACOVA_03015    | Predicted Protein                                      |      |       |      | 45.5  |
| BACOVA_03016    | Hypothetical Protein                                   |      |       |      | 42.0  |
| BACOVA_00832    | Hypothetical Protein                                   |      |       |      | 39.6  |
| BACOVA_00833    | Conserved Hypothetical Protein                         |      |       |      | 35.4  |
| BACOVA_03015    | Predicted Protein                                      |      |       |      | 33.2  |

|              |                                                           |      |
|--------------|-----------------------------------------------------------|------|
| BACOVA_03815 | Similar to TonB-dependent outer membrane receptor         | 30.9 |
| BACOVA_04529 | Hypothetical Protein                                      | 28.9 |
| BACOVA_04526 | Hypothetical Protein                                      | 28.6 |
| BACOVA_01522 | Conserved Hypothetical Protein                            | 27.6 |
| BACOVA_00095 | Predicted Protein                                         | 27.6 |
| BACOVA_04262 | Conserved Hypothetical Protein                            | 23.3 |
| BACOVA_01520 | Hypothetical Protein                                      | 23.1 |
| BACOVA_03782 | Similar to anthranilate phosphoribosyltransferase         | 21.5 |
| BACOVA_03781 | Similar to anthranilate synthase component II             | 14.7 |
| BACOVA_03014 | Predicted Protein                                         | 13.5 |
| BACOVA_00270 | Hypothetical Protein                                      | 13.4 |
| BACOVA_01519 | Predicted Protein                                         | 13.3 |
| BACOVA_04368 | HTCS                                                      | 12.8 |
| BACOVA_04307 | Conserved Hypothetical Protein                            | 12.2 |
| BACOVA_01233 | Similar to histidinol-phosphate aminotransferase          | 12.2 |
| BACOVA_04307 | Conserved Hypothetical Protein                            | 12.0 |
| BACOVA_02394 | Conserved Hypothetical Protein                            | 11.9 |
| BACOVA_02395 | Hypothetical Protein                                      | 11.6 |
| BACOVA_03731 | Similar to polysaccharide export outer membrane protein   | 11.3 |
| BACOVA_04306 | Conserved Hypothetical Protein                            | 11.3 |
| BACOVA_03789 | Hypothetical Protein                                      | 10.2 |
| BACOVA_05110 | Similar to NADPH-dependent glutamate synthase small chain | 10.0 |
| BACOVA_05596 | Similar to pyruvate formate-lyase activating enzyme       | 10.0 |
