# Supplementary material for: Recognition and Degradation of Plant Cell Wall Polysaccharides by Two Human Gut Symbionts
Source: PubMed Central journal article supplement (PMC3243724; doi:10.1371/journal.pbio.1001221), 2011-12-20
Supplement: pbio.1001221.s014.pdf [file pbio.1001221.s014.pdf]

**Table S5. Putative PULs identified in the *B. ovatus* ATCC8384 genome**

Abbreviations and notes: extracytoplasmic function sigma factor, ECF; hybrid two-component system, HTCS.

Regulators with homology to other families of PUL-associated regulators are indicated: SusR, GntR, AraC.

The presence of a potential regulator in a different family is indicated as "unknown".

*B. ovatus* PULs that contain genes expressed *in vivo* in the ceca of mice fed a plant rich diet are indicated in the final column.

| PUL number   | Regulator                      | Gene range   | CAZy annotation               | <i>In vivo</i> expressed PULs (induced genes are indicated and highlighted in yellow) |
|--------------|--------------------------------|--------------|-------------------------------|---------------------------------------------------------------------------------------|
| 1            | ECF                            | BACOVA_00098 |                               |                                                                                       |
|              |                                | BACOVA_00101 | susC-like                     |                                                                                       |
|              |                                | BACOVA_00102 | susD-like                     |                                                                                       |
|              |                                | BACOVA_00103 |                               |                                                                                       |
|              |                                | BACOVA_00104 | Glycoside Hydrolase Family 20 |                                                                                       |
| 2            | none                           | BACOVA_00136 |                               |                                                                                       |
|              |                                | BACOVA_00137 | susD-like                     |                                                                                       |
|              |                                | BACOVA_00138 | susC-like                     |                                                                                       |
| 3            | ECF                            | BACOVA_00154 |                               |                                                                                       |
|              |                                | BACOVA_00155 |                               |                                                                                       |
|              |                                | BACOVA_00156 | susC-like                     |                                                                                       |
|              |                                | BACOVA_00157 | susD-like                     |                                                                                       |
|              |                                | BACOVA_00158 |                               |                                                                                       |
|              |                                | BACOVA_00159 | Glycoside Hydrolase Family 18 |                                                                                       |
| 4            | HTCS                           | BACOVA_00239 |                               |                                                                                       |
|              |                                | BACOVA_00240 |                               |                                                                                       |
|              |                                | BACOVA_00241 |                               |                                                                                       |
|              |                                | BACOVA_00242 | susC-like                     |                                                                                       |
|              |                                | BACOVA_00243 | susD-like                     |                                                                                       |
|              |                                | BACOVA_00244 | susC-like                     |                                                                                       |
|              |                                | BACOVA_00245 | susD-like                     |                                                                                       |
|              |                                | BACOVA_00246 |                               |                                                                                       |
|              |                                | BACOVA_00247 | Glycoside Hydrolase Family 10 |                                                                                       |
|              |                                | BACOVA_00248 | Polysaccharide Lyase Family 9 |                                                                                       |
| BACOVA_00249 | Glycoside Hydrolase Family 115 |              |                               |                                                                                       |

|        |              |                              |
|--------|--------------|------------------------------|
| 5 none | BACOVA_00250 | Glycoside Hydrolase Family 2 |
|        | BACOVA_00264 |                              |
|        | BACOVA_00265 | susC-like                    |
| 6 ECF  | BACOVA_00266 | susD-like                    |
|        | BACOVA_00267 |                              |
|        | BACOVA_00272 |                              |
|        | BACOVA_00273 |                              |
|        | BACOVA_00274 |                              |
|        | BACOVA_00275 |                              |
|        | BACOVA_00276 |                              |
|        | BACOVA_00277 |                              |
|        | BACOVA_00278 |                              |
|        | BACOVA_00279 |                              |
|        | BACOVA_00280 | susD-like                    |
| 7 none | BACOVA_00281 | susC-like                    |
|        | BACOVA_00282 |                              |
|        | BACOVA_00283 |                              |
|        | BACOVA_00284 |                              |
|        | BACOVA_00298 |                              |
|        | BACOVA_00299 |                              |
|        | BACOVA_00300 |                              |
|        | BACOVA_00301 |                              |
|        | BACOVA_00302 |                              |
|        | BACOVA_00303 |                              |
|        | BACOVA_00304 |                              |
|        | BACOVA_00305 |                              |
|        | BACOVA_00306 |                              |
|        | BACOVA_00307 |                              |
|        | BACOVA_00308 |                              |
|        | BACOVA_00309 | susD-like                    |
|        | BACOVA_00310 | susC-like                    |
| 8 ECF  | BACOVA_00425 |                              |
|        | BACOVA_00426 | Glycoside Hydrolase Family 3 |
|        | BACOVA_00427 | Glycoside Hydrolase Family 3 |
|        | BACOVA_00428 | Glycoside Hydrolase Family 3 |
|        | BACOVA_00429 |                              |

|         |              |                                                                  |                                                              |
|---------|--------------|------------------------------------------------------------------|--------------------------------------------------------------|
|         | BACOVA_00430 |                                                                  |                                                              |
|         | BACOVA_00431 |                                                                  |                                                              |
|         | BACOVA_00432 |                                                                  |                                                              |
|         | BACOVA_00433 | susD-like                                                        |                                                              |
|         | BACOVA_00434 | susC-like                                                        |                                                              |
|         | BACOVA_00435 |                                                                  |                                                              |
|         | BACOVA_00436 |                                                                  |                                                              |
| 9 none  | BACOVA_00556 |                                                                  |                                                              |
|         | BACOVA_00557 | susD-like                                                        | bacova_00557-60 are induced <i>in vivo</i> in plant fed mice |
|         | BACOVA_00558 | susC-like                                                        |                                                              |
|         | BACOVA_00559 | Glycoside Hydrolase Family 20-<br>Carbohydrate Binding Module 32 |                                                              |
|         | BACOVA_00560 | Glycoside Hydrolase Family 20-<br>Carbohydrate Binding Module 32 |                                                              |
|         | BACOVA_00561 |                                                                  |                                                              |
|         | BACOVA_00562 | Glycoside Hydrolase Family 2                                     |                                                              |
|         | BACOVA_00563 | Glycoside Hydrolase Family 33                                    |                                                              |
| 10 ECF  | BACOVA_00619 |                                                                  |                                                              |
|         | BACOVA_00620 |                                                                  |                                                              |
|         | BACOVA_00621 | susC-like                                                        |                                                              |
|         | BACOVA_00622 | susD-like                                                        |                                                              |
|         | BACOVA_00623 | susC-like                                                        |                                                              |
|         | BACOVA_00624 | susD-like                                                        |                                                              |
|         | BACOVA_00625 | Glycoside Hydrolase Family 16-                                   |                                                              |
|         | BACOVA_00626 | Glycoside Hydrolase Family 3                                     |                                                              |
|         | BACOVA_00627 |                                                                  |                                                              |
| 11 none | BACOVA_00653 |                                                                  |                                                              |
|         | BACOVA_00654 |                                                                  |                                                              |
|         | BACOVA_00655 |                                                                  |                                                              |
|         | BACOVA_00656 |                                                                  |                                                              |
|         | BACOVA_00657 | susC-like                                                        |                                                              |
|         | BACOVA_00658 | susD-like                                                        |                                                              |
|         | BACOVA_00659 |                                                                  |                                                              |
|         | BACOVA_00660 |                                                                  |                                                              |

|         |              |                              |
|---------|--------------|------------------------------|
| 12      | BACOVA_00661 |                              |
|         | BACOVA_00681 | susD-like                    |
|         | BACOVA_00682 | susC-like                    |
| 13 ECF  | BACOVA_00832 |                              |
|         | BACOVA_00833 |                              |
|         | BACOVA_00834 |                              |
|         | BACOVA_00835 |                              |
|         | BACOVA_00836 |                              |
|         | BACOVA_00837 | Glycoside Hydrolase Family 2 |
|         | BACOVA_00838 |                              |
|         | BACOVA_00839 | susD-like                    |
|         | BACOVA_00840 | susC-like                    |
|         | BACOVA_00841 |                              |
|         | BACOVA_00842 |                              |
| 14 none | BACOVA_00865 | susD-like                    |
|         | BACOVA_00866 | susC-like                    |
| 15 ECF  | BACOVA_00883 |                              |
|         | BACOVA_00884 |                              |
|         | BACOVA_00885 | susC-like                    |
|         | BACOVA_00886 | susD-like                    |
|         | BACOVA_00887 |                              |
|         | BACOVA_00888 |                              |
|         | BACOVA_00889 |                              |
|         | BACOVA_00890 |                              |
|         | BACOVA_00891 |                              |
|         | BACOVA_00892 |                              |
| 16 ECF  | BACOVA_00915 |                              |
|         | BACOVA_00916 |                              |
|         | BACOVA_00917 |                              |
|         | BACOVA_00918 | susD-like                    |
|         | BACOVA_00919 | susC-like                    |
|         | BACOVA_00920 |                              |
|         | BACOVA_00921 |                              |
|         | BACOVA_00922 |                              |
|         | BACOVA_00923 |                              |
| 17 SusR | BACOVA_00932 |                              |

|         |               |                                                                 |
|---------|---------------|-----------------------------------------------------------------|
|         | BACOVA_00933  |                                                                 |
|         | BACOVA_00934  | susC-like                                                       |
|         | BACOVA_00935  | susD-like                                                       |
|         | BACOVA_00936  |                                                                 |
|         | BACOVA_00937  |                                                                 |
|         | BACOVA_00938  |                                                                 |
|         | BACOVA_00939  |                                                                 |
| 18 SusR | BACOVA_00940  | Glycoside Hydrolase Family 20                                   |
|         | BACOVA_00941  |                                                                 |
|         | BACOVA_00942  | susC-like                                                       |
|         | BACOVA_00943  | susD-like                                                       |
|         | BACOVA_00944  | Glycoside Hydrolase Family 30                                   |
|         | BACOVA_00945  |                                                                 |
| 19 HTCS | BACOVA_00946  | Glycoside Hydrolase Family 3                                    |
|         | BACOVA_00974  |                                                                 |
|         | BACOVA_00975  |                                                                 |
|         | BACOVA_00976  |                                                                 |
|         | BACOVA_00977  | Glycoside Hydrolase Family 5-<br>Carbohydrate Binding Module 35 |
|         | BACOVA_00978  | susC-like                                                       |
|         | BACOVA_00979  | susD-like                                                       |
|         | BACOVA_00980  | Carbohydrate Esterase 12-<br>Carbohydrate Esterase 4            |
|         | BACOVA_00981  | Glycoside Hydrolase Family 43                                   |
| 20 ECF  | BACOVA_00982  | Glycoside Hydrolase Family 115                                  |
|         | BACOVA_001132 |                                                                 |
|         | BACOVA_001133 |                                                                 |
|         | BACOVA_001134 |                                                                 |
|         | BACOVA_001135 |                                                                 |
|         | BACOVA_001136 |                                                                 |
|         | BACOVA_001137 |                                                                 |
|         | BACOVA_001138 |                                                                 |
|         | BACOVA_001139 |                                                                 |
| 21 none | BACOVA_001198 |                                                                 |
|         | BACOVA_001199 |                                                                 |
| 22 HTCS | BACOVA_01213  |                                                                 |

|         |              |                                |
|---------|--------------|--------------------------------|
|         | BACOVA_01214 | Glycoside Hydrolase Family 31  |
|         | BACOVA_01215 | Glycoside Hydrolase Family 76  |
|         | BACOVA_01216 | Carbohydrate Binding Module 32 |
|         | BACOVA_01217 | susC-like                      |
|         | BACOVA_01218 | susD-like                      |
|         | BACOVA_01219 |                                |
|         | BACOVA_01220 |                                |
|         | BACOVA_01221 | Glycoside Hydrolase Family 31  |
|         | BACOVA_01222 | Glycoside Hydrolase Family 92  |
|         | BACOVA_01223 | Glycoside Hydrolase Family 92  |
| 23 none | BACOVA_01224 |                                |
|         | BACOVA_01225 |                                |
|         | BACOVA_01226 |                                |
|         | BACOVA_01227 | susD-like                      |
|         | BACOVA_01228 | susC-like                      |
| 24 ECF  | BACOVA_01243 |                                |
|         | BACOVA_01244 |                                |
|         | BACOVA_01245 |                                |
|         | BACOVA_01246 |                                |
|         | BACOVA_01247 | susD-like                      |
|         | BACOVA_01248 | susC-like                      |
|         | BACOVA_01249 |                                |
|         | BACOVA_01250 |                                |
|         | BACOVA_01251 |                                |
| 25 HTCS | BACOVA_01291 |                                |
|         | BACOVA_01292 | Glycoside Hydrolase Family 88  |
|         | BACOVA_01293 | Glycoside Hydrolase Family 43  |
|         | BACOVA_01294 |                                |
|         | BACOVA_01295 |                                |
|         | BACOVA_01296 | susD-like                      |
|         | BACOVA_01297 | susC-like                      |
|         | BACOVA_01298 |                                |
|         | BACOVA_01299 |                                |
|         | BACOVA_01300 |                                |
|         | BACOVA_01301 |                                |
| 26 HTCS | BACOVA_01304 | Glycoside Hydrolase Family 2   |

|         |              |                                |
|---------|--------------|--------------------------------|
|         | BACOVA_01305 |                                |
|         | BACOVA_01306 |                                |
|         | BACOVA_01307 | susD-like                      |
|         | BACOVA_01308 | susC-like                      |
|         | BACOVA_01309 |                                |
|         | BACOVA_01310 |                                |
|         | BACOVA_01311 |                                |
| 27 HTCS | BACOVA_01312 | Polysaccharide Lyase Family 15 |
|         | BACOVA_01313 |                                |
|         | BACOVA_01314 |                                |
|         | BACOVA_01315 | Glycoside Hydrolase Family 28  |
|         | BACOVA_01316 |                                |
|         | BACOVA_01317 | Glycoside Hydrolase Family 30  |
|         | BACOVA_01318 |                                |
|         | BACOVA_01319 |                                |
|         | BACOVA_01320 | susD-like                      |
|         | BACOVA_01321 | susC-like                      |
|         | BACOVA_01322 |                                |
|         | BACOVA_01323 |                                |
|         | BACOVA_01324 |                                |
| 28 none | BACOVA_01382 |                                |
|         | BACOVA_01383 |                                |
|         | BACOVA_01384 | susD-like                      |
|         | BACOVA_01386 | susC-like                      |
| 29 none | BACOVA_01405 | susC-like                      |
|         | BACOVA_01406 | susD-like                      |
| 30 ECF  | BACOVA_01604 |                                |
|         | BACOVA_01605 |                                |
|         | BACOVA_01606 | susC-like                      |
|         | BACOVA_01607 | susD-like                      |
|         | BACOVA_01608 |                                |
|         | BACOVA_01609 | Glycoside Hydrolase Family 27  |
|         | BACOVA_01610 | Carbohydrate Binding Module 35 |
|         | BACOVA_01611 |                                |
| 31 HTCS | BACOVA_01661 | Glycoside Hydrolase Family 109 |
|         | BACOVA_01662 |                                |

|         |              |                                                                 |                                                                   |
|---------|--------------|-----------------------------------------------------------------|-------------------------------------------------------------------|
|         | BACOVA_01663 |                                                                 |                                                                   |
|         | BACOVA_01664 |                                                                 |                                                                   |
|         | BACOVA_01665 |                                                                 |                                                                   |
|         | BACOVA_01666 | susD-like                                                       |                                                                   |
|         | BACOVA_01667 | susC-like                                                       |                                                                   |
|         | BACOVA_01668 |                                                                 |                                                                   |
|         | BACOVA_01669 |                                                                 |                                                                   |
|         | BACOVA_01670 |                                                                 |                                                                   |
|         | BACOVA_01671 | Glycoside Hydrolase Family 2                                    |                                                                   |
|         | BACOVA_01672 | Glycoside Hydrolase Family 88                                   |                                                                   |
|         | BACOVA_01673 |                                                                 |                                                                   |
|         | BACOVA_01674 |                                                                 |                                                                   |
|         | BACOVA_01675 |                                                                 |                                                                   |
| 32 ECF  | BACOVA_01682 |                                                                 |                                                                   |
|         | BACOVA_01683 |                                                                 |                                                                   |
|         | BACOVA_01684 | susC-like                                                       |                                                                   |
|         | BACOVA_01685 | susD-like                                                       |                                                                   |
|         | BACOVA_01686 |                                                                 |                                                                   |
|         | BACOVA_01687 | Glycoside Hydrolase Family 88-<br>Glycoside Hydrolase Family 92 |                                                                   |
| 33 none | BACOVA_01792 |                                                                 | bacova_01792-1803 are induced <i>in vivo</i><br>in plant fed mice |
|         | BACOVA_01793 |                                                                 |                                                                   |
|         | BACOVA_01794 |                                                                 |                                                                   |
|         | BACOVA_01795 |                                                                 |                                                                   |
|         | BACOVA_01796 | susC-like                                                       |                                                                   |
|         | BACOVA_01797 | susD-like                                                       |                                                                   |
|         | BACOVA_01798 |                                                                 |                                                                   |
|         | BACOVA_01799 |                                                                 |                                                                   |
|         | BACOVA_01800 |                                                                 |                                                                   |
|         | BACOVA_01801 |                                                                 |                                                                   |
|         | BACOVA_01802 | Carbohydrate Esterase 6                                         |                                                                   |
|         | BACOVA_01803 |                                                                 |                                                                   |
| 34 none | BACOVA_01804 |                                                                 |                                                                   |
|         | BACOVA_01805 |                                                                 |                                                                   |
|         | BACOVA_01806 |                                                                 |                                                                   |



bacova\_01807-19 are induced *in vivo* in  
plant fed mice

BACOVA\_01807  
BACOVA\_01808 Carbohydrate Esterase 6  
BACOVA\_01809  
BACOVA\_01810  
BACOVA\_01811  
BACOVA\_01812  
BACOVA\_01813  
BACOVA\_01814 susD-like  
BACOVA\_01815 susC-like  
BACOVA\_01816  
BACOVA\_01817  
BACOVA\_01818  
BACOVA\_01819

35 HTCS

BACOVA\_01822  
BACOVA\_01823  
BACOVA\_01824  
BACOVA\_01825 susC-like  
BACOVA\_01826 susD-like  
BACOVA\_01827  
BACOVA\_01828  
BACOVA\_01829  
BACOVA\_01830  
BACOVA\_01831  
BACOVA\_01832 susC-like  
BACOVA\_01833 susD-like  
BACOVA\_01834 susC-like  
BACOVA\_01835 susD-like  
BACOVA\_01836  
BACOVA\_01837  
BACOVA\_01838  
BACOVA\_01839  
BACOVA\_01840  
BACOVA\_01841  
BACOVA\_01842  
BACOVA\_01843

|         |              |                               |
|---------|--------------|-------------------------------|
| 36 HTCS | BACOVA_01844 |                               |
|         | BACOVA_01967 | Polysaccharide Lyase Family 8 |
|         | BACOVA_01968 |                               |
|         | BACOVA_01969 | Glycoside Hydrolase Family 88 |
|         | BACOVA_01996 |                               |
|         | BACOVA_01997 |                               |
|         | BACOVA_01998 | susC-like                     |
|         | BACOVA_01999 | susD-like                     |
|         | BACOVA_02000 |                               |
|         | BACOVA_02001 |                               |
| 37 none | BACOVA_02002 |                               |
|         | BACOVA_01971 | Glycoside Hydrolase Family 2  |
|         | BACOVA_01972 |                               |
|         | BACOVA_01973 | Glycoside Hydrolase Family 43 |
|         | BACOVA_01974 | susD-like                     |
|         | BACOVA_01975 | susC-like                     |
| 38 none | BACOVA_01976 |                               |
|         | BACOVA_01986 |                               |
|         | BACOVA_01987 | susC-like                     |
|         | BACOVA_01988 | susD-like                     |
| 39 ECF  | BACOVA_01989 | susC-like                     |
|         | BACOVA_02036 |                               |
| 40 LacI | BACOVA_02037 |                               |
|         | BACOVA_02038 | Glycoside Hydrolase Family 89 |
|         | BACOVA_02039 |                               |
|         | BACOVA_02040 |                               |
|         | BACOVA_02041 |                               |
|         | BACOVA_02042 | Glycoside Hydrolase Family 89 |
|         | BACOVA_02043 |                               |
|         | BACOVA_02044 | susD-like                     |
|         | BACOVA_02045 | susC-like                     |
|         | BACOVA_02046 |                               |
|         | BACOVA_02049 |                               |
|         | BACOVA_02050 |                               |

|              |           |
|--------------|-----------|
| BACOVA_02051 | susC-like |
|--------------|-----------|

bacova\_02051-59 are induced *in vivo* in plant fed mice

|         |              |                                |
|---------|--------------|--------------------------------|
|         | BACOVA_02052 | susD-like                      |
|         | BACOVA_02053 |                                |
|         | BACOVA_02054 |                                |
|         | BACOVA_02055 |                                |
|         | BACOVA_02056 | Carbohydrate Esterase 1        |
|         | BACOVA_02057 | Carbohydrate Esterase 1        |
|         | BACOVA_02058 |                                |
|         | BACOVA_02059 |                                |
| 41 HTCS | BACOVA_02060 |                                |
|         | BACOVA_02061 | Glycoside Hydrolase Family 18  |
|         | BACOVA_02062 |                                |
|         | BACOVA_02063 | susD-like                      |
|         | BACOVA_02064 | susC-like                      |
|         | BACOVA_02065 |                                |
| 42 HTCS | BACOVA_02087 |                                |
|         | BACOVA_02088 |                                |
|         | BACOVA_02089 |                                |
|         | BACOVA_02090 |                                |
|         | BACOVA_02091 | Glycoside Hydrolase Family 36  |
|         | BACOVA_02092 | Glycoside Hydrolase Family 26  |
|         | BACOVA_02093 | Glycoside Hydrolase Family 26  |
|         | BACOVA_02094 |                                |
|         | BACOVA_02095 | susD-like                      |
|         | BACOVA_02096 | susC-like                      |
|         | BACOVA_02097 |                                |
| 43 ECF  | BACOVA_02102 |                                |
|         | BACOVA_02103 |                                |
|         | BACOVA_02104 | Glycoside Hydrolase Family 2   |
|         | BACOVA_02105 | Carbohydrate Esterase 7        |
|         | BACOVA_02106 | Glycoside Hydrolase Family 36  |
|         | BACOVA_02107 |                                |
|         | BACOVA_02108 | Glycoside Hydrolase Family 105 |
|         | BACOVA_02109 | Glycoside Hydrolase Family 3   |
|         | BACOVA_02110 | Glycoside Hydrolase Family 3   |
|         | BACOVA_02111 |                                |
|         | BACOVA_02112 |                                |

|              |                                |                                |                                                              |
|--------------|--------------------------------|--------------------------------|--------------------------------------------------------------|
| 44 HTCS      | BACOVA_02113                   |                                |                                                              |
|              | BACOVA_02114                   |                                |                                                              |
|              | BACOVA_02115                   | susC-like                      |                                                              |
|              | BACOVA_02116                   | susD-like                      |                                                              |
|              | BACOVA_02117                   |                                |                                                              |
|              | BACOVA_02156                   |                                |                                                              |
|              | BACOVA_02157                   |                                |                                                              |
|              | BACOVA_02158                   | Glycoside Hydrolase Family 105 |                                                              |
|              | BACOVA_02159                   | Glycoside Hydrolase Family 105 |                                                              |
|              | BACOVA_02160                   | Glycoside Hydrolase Family 2   |                                                              |
|              | BACOVA_02161                   |                                |                                                              |
|              | BACOVA_02162                   | Glycoside Hydrolase Family 2   |                                                              |
|              | BACOVA_02163                   |                                |                                                              |
|              | BACOVA_02164                   |                                |                                                              |
|              | BACOVA_02165                   |                                |                                                              |
|              | BACOVA_02166                   | susD-like                      |                                                              |
|              | BACOVA_02167                   | susC-like                      |                                                              |
| BACOVA_02168 |                                |                                |                                                              |
| BACOVA_02169 | Glycoside Hydrolase Family 43  |                                |                                                              |
| BACOVA_02170 |                                |                                |                                                              |
| BACOVA_02171 | Glycoside Hydrolase Family 105 |                                |                                                              |
| BACOVA_02172 |                                |                                |                                                              |
| BACOVA_02173 | Glycoside Hydrolase Family 115 |                                |                                                              |
|              | BACOVA_02174                   | susD-like                      | bacova_02174-75 are induced <i>in vivo</i> in plant fed mice |
|              | BACOVA_02175                   | susC-like                      |                                                              |
| 45 ECF       | BACOVA_02176                   |                                |                                                              |
|              | BACOVA_02177                   |                                |                                                              |
|              | BACOVA_02178                   | Glycoside Hydrolase Family 109 |                                                              |
|              | BACOVA_02179                   |                                |                                                              |
|              | BACOVA_02180                   | Glycoside Hydrolase Family 109 |                                                              |
|              | BACOVA_02181                   | Glycoside Hydrolase Family 43  |                                                              |
|              | BACOVA_02182                   |                                |                                                              |
|              | BACOVA_02183                   |                                |                                                              |
|              | BACOVA_02488                   |                                |                                                              |
|              | BACOVA_02489                   |                                |                                                              |

|         |              |                                                 |                                                              |
|---------|--------------|-------------------------------------------------|--------------------------------------------------------------|
|         | BACOVA_02490 | susC-like                                       |                                                              |
|         | BACOVA_02491 | susD-like                                       |                                                              |
|         | BACOVA_02492 |                                                 |                                                              |
|         | BACOVA_02493 | Glycoside Hydrolase Family 2                    |                                                              |
| 46 none | BACOVA_02626 | Glycoside Hydrolase Family 5                    | bacova_02626-36 are induced <i>in vivo</i> in plant fed mice |
|         | BACOVA_02627 | susC-like                                       |                                                              |
|         | BACOVA_02628 | susD-like                                       |                                                              |
|         | BACOVA_02629 |                                                 |                                                              |
|         | BACOVA_02630 | Glycoside Hydrolase Family 5                    |                                                              |
|         | BACOVA_02631 | Glycoside Hydrolase Family 2                    |                                                              |
|         | BACOVA_02632 | Glycoside Hydrolase Family 5                    |                                                              |
|         | BACOVA_02633 |                                                 |                                                              |
|         | BACOVA_02634 |                                                 |                                                              |
|         | BACOVA_02635 |                                                 |                                                              |
|         | BACOVA_02636 | Glycoside Hydrolase Family 78                   |                                                              |
|         | BACOVA_02637 |                                                 |                                                              |
|         | BACOVA_02638 | Carbohydrate Esterase 6-Carbohydrate Esterase 6 |                                                              |
| 47 HTCS | BACOVA_02639 |                                                 |                                                              |
|         | BACOVA_02640 |                                                 |                                                              |
|         | BACOVA_02641 |                                                 |                                                              |
|         | BACOVA_02642 |                                                 |                                                              |
|         | BACOVA_02643 |                                                 |                                                              |
|         | BACOVA_02644 | Glycoside Hydrolase Family 3                    |                                                              |
|         | BACOVA_02645 | Glycoside Hydrolase Family 2                    |                                                              |
|         | BACOVA_02646 | Glycoside Hydrolase Family 31                   |                                                              |
|         | BACOVA_02647 |                                                 |                                                              |
|         | BACOVA_02648 |                                                 |                                                              |
|         | BACOVA_02649 | Glycoside Hydrolase Family 9                    |                                                              |
|         | BACOVA_02650 |                                                 |                                                              |
|         | BACOVA_02651 | susD-like                                       |                                                              |
|         | BACOVA_02652 | susC-like                                       |                                                              |
|         | BACOVA_02653 | Glycoside Hydrolase Family 5                    |                                                              |
|         | BACOVA_02654 | Glycoside Hydrolase Family 43                   |                                                              |
|         | BACOVA_02655 |                                                 |                                                              |

|         |              |                                |
|---------|--------------|--------------------------------|
|         | BACOVA_02656 | Glycoside Hydrolase Family 43  |
|         | BACOVA_02657 |                                |
|         | BACOVA_02658 |                                |
|         | BACOVA_02659 | Glycoside Hydrolase Family 3   |
| 48 HTCS | BACOVA_02661 | Glycoside Hydrolase Family 5   |
|         | BACOVA_02662 | Glycoside Hydrolase Family 43  |
|         | BACOVA_02663 |                                |
|         | BACOVA_02664 | susD-like                      |
|         | BACOVA_02665 | susC-like                      |
|         | BACOVA_02666 |                                |
|         | BACOVA_02667 |                                |
| 49 HTCS | BACOVA_02692 | Glycoside Hydrolase Family 2   |
|         | BACOVA_02693 | Carbohydrate Esterase 12       |
|         | BACOVA_02694 |                                |
|         | BACOVA_02695 |                                |
|         | BACOVA_02696 |                                |
|         | BACOVA_02697 |                                |
|         | BACOVA_02698 |                                |
|         | BACOVA_02699 | Glycoside Hydrolase Family 106 |
|         | BACOVA_02700 |                                |
|         | BACOVA_02701 |                                |
|         | BACOVA_02702 | Polysaccharide Lyase Family 11 |
|         | BACOVA_02703 | susD-like                      |
|         | BACOVA_02704 | susC-like                      |
|         | BACOVA_02705 |                                |
|         | BACOVA_02706 |                                |
|         | BACOVA_02707 | susD-like                      |
|         | BACOVA_02708 | susC-like                      |
|         | BACOVA_02709 |                                |
|         | BACOVA_02710 | Glycoside Hydrolase Family 2   |
|         | BACOVA_02711 | Glycoside Hydrolase Family 88  |
|         | BACOVA_02712 |                                |
|         | BACOVA_02713 |                                |
|         | BACOVA_02714 | Glycoside Hydrolase Family 28  |
|         | BACOVA_02715 | Glycoside Hydrolase Family 95  |
|         | BACOVA_02716 |                                |

|         |              |                                |
|---------|--------------|--------------------------------|
| 50 ECF  | BACOVA_02717 | Glycoside Hydrolase Family 2   |
|         | BACOVA_02718 | Glycoside Hydrolase Family 105 |
|         | BACOVA_02719 | Polysaccharide Lyase Family 11 |
|         | BACOVA_02727 |                                |
|         | BACOVA_02728 |                                |
|         | BACOVA_02729 | susC-like                      |
|         | BACOVA_02730 | susD-like                      |
|         | BACOVA_02731 |                                |
|         | BACOVA_02732 |                                |
|         | BACOVA_02733 |                                |
| 51 HTCS | BACOVA_02734 |                                |
|         | BACOVA_02735 |                                |
|         | BACOVA_02738 | Glycoside Hydrolase Family 3   |
|         | BACOVA_02739 |                                |
|         | BACOVA_02740 |                                |
|         | BACOVA_02741 | Glycoside Hydrolase Family 16  |
|         | BACOVA_02742 | susC-like                      |
|         | BACOVA_02743 | susD-like                      |
|         | BACOVA_02744 |                                |
|         | BACOVA_02745 | Glycoside Hydrolase Family 3   |
| 52 HTCS | BACOVA_02746 |                                |
|         | BACOVA_02747 |                                |
|         | BACOVA_02748 | Carbohydrate Esterase 6        |
|         | BACOVA_02749 |                                |
|         | BACOVA_02750 |                                |
|         | BACOVA_02751 | susD-like                      |
|         | BACOVA_02752 | susC-like                      |
|         | BACOVA_02753 | Glycoside Hydrolase Family 3   |
|         | BACOVA_02754 |                                |
|         | BACOVA_02755 | Glycoside Hydrolase Family 36  |
| 53 SusR | BACOVA_02756 |                                |
|         | BACOVA_02757 |                                |
|         | BACOVA_02782 |                                |
|         | BACOVA_02783 | Glycoside Hydrolase Family 31  |
|         | BACOVA_02784 | Glycoside Hydrolase Family 66  |
|         | BACOVA_02785 |                                |

|            |              |                               |
|------------|--------------|-------------------------------|
|            | BACOVA_02786 | susD-like                     |
|            | BACOVA_02787 | susC-like                     |
|            | BACOVA_02788 |                               |
| 54 HTCS    | BACOVA_02795 | Glycoside Hydrolase Family 2  |
|            | BACOVA_02796 |                               |
|            | BACOVA_02797 | Glycoside Hydrolase Family 43 |
|            | BACOVA_02798 |                               |
|            | BACOVA_02799 | Glycoside Hydrolase Family 51 |
|            | BACOVA_02800 |                               |
|            | BACOVA_02801 |                               |
|            | BACOVA_02802 |                               |
|            | BACOVA_02803 | susC-like                     |
|            | BACOVA_02804 | susD-like                     |
|            | BACOVA_02805 | susC-like                     |
|            | BACOVA_02806 | Glycoside Hydrolase Family 43 |
|            | BACOVA_02807 |                               |
|            | BACOVA_02808 |                               |
|            | BACOVA_02809 |                               |
|            | BACOVA_02810 |                               |
|            | BACOVA_02811 |                               |
| 55 unknown | BACOVA_02816 |                               |
|            | BACOVA_02817 | susC-like                     |
|            | BACOVA_02818 | susD-like                     |
|            | BACOVA_02819 |                               |
| 56 ECF     | BACOVA_02845 |                               |
|            | BACOVA_02846 |                               |
|            | BACOVA_02847 | susC-like                     |
|            | BACOVA_02848 | susD-like                     |
|            | BACOVA_02849 |                               |
|            | BACOVA_02850 |                               |
|            | BACOVA_02851 |                               |
|            | BACOVA_02852 |                               |
|            | BACOVA_02853 |                               |
| 57 HTCS    | BACOVA_02857 |                               |
|            | BACOVA_02858 | Carbohydrate Esterase 6       |
|            | BACOVA_02859 | susC-like                     |



|            |              |                                |
|------------|--------------|--------------------------------|
|            | BACOVA_02860 | susD-like                      |
|            | BACOVA_02861 | Polysaccharide Lyase Family 15 |
|            | BACOVA_02862 |                                |
|            | BACOVA_02863 | Glycoside Hydrolase Family 88  |
|            | BACOVA_02864 |                                |
|            | BACOVA_02865 |                                |
| 58 HTCS    | BACOVA_02881 |                                |
|            | BACOVA_02882 |                                |
|            | BACOVA_02883 | susD-like                      |
|            | BACOVA_02884 | susC-like                      |
|            | BACOVA_02885 |                                |
|            | BACOVA_02886 |                                |
|            | BACOVA_02887 |                                |
| 59 ECF     | BACOVA_02943 |                                |
|            | BACOVA_02944 |                                |
|            | BACOVA_02945 | susC-like                      |
|            | BACOVA_02946 | susD-like                      |
|            | BACOVA_02947 |                                |
|            | BACOVA_02948 |                                |
|            | BACOVA_02949 | Glycoside Hydrolase Family 5   |
|            | BACOVA_02950 | Glycoside Hydrolase Family 20  |
| 60 none    | BACOVA_02951 |                                |
|            | BACOVA_02952 |                                |
|            | BACOVA_02953 |                                |
|            | BACOVA_02954 | susC-like                      |
|            | BACOVA_02955 | susD-like                      |
|            | BACOVA_02956 | Glycoside Hydrolase Family 43  |
|            | BACOVA_02957 |                                |
|            | BACOVA_02958 | Glycoside Hydrolase Family 3   |
|            | BACOVA_02959 | Glycoside Hydrolase Family 97  |
| 61 unknown | BACOVA_03062 | susD-like                      |
|            | BACOVA_03063 | susC-like                      |
| 62 unknown | BACOVA_03078 | susD-like                      |
|            | BACOVA_03079 | susC-like                      |
|            | BACOVA_03080 |                                |
|            | BACOVA_03081 |                                |

|              |              |                                |
|--------------|--------------|--------------------------------|
| 63 HTCS      | BACOVA_03082 | susC-like                      |
|              | BACOVA_03083 | susD-like                      |
|              | BACOVA_03096 |                                |
|              | BACOVA_03097 | susC-like                      |
|              | BACOVA_03098 | susD-like                      |
|              | BACOVA_03099 |                                |
| 64 ECF       | BACOVA_03100 | Glycoside Hydrolase Family 2   |
|              | BACOVA_03101 | Glycoside Hydrolase Family 50  |
|              | BACOVA_03102 | Glycoside Hydrolase Family 50  |
|              | BACOVA_03118 | Glycoside Hydrolase Family 106 |
|              | BACOVA_03119 |                                |
|              | BACOVA_03120 | Glycoside Hydrolase Family 78  |
|              | BACOVA_03121 | Glycoside Hydrolase Family 20  |
|              | BACOVA_03122 |                                |
|              | BACOVA_03123 |                                |
|              | BACOVA_03124 |                                |
|              | BACOVA_03125 | susD-like                      |
|              | BACOVA_03126 |                                |
|              | BACOVA_03127 | susC-like                      |
| BACOVA_03128 |              |                                |
| BACOVA_03129 |              |                                |
| 65 unknown   | BACOVA_03153 | susD-like                      |
|              | BACOVA_03154 | susC-like                      |
| 66 unknown   | BACOVA_03171 |                                |
|              | BACOVA_03172 |                                |
|              | BACOVA_03173 |                                |
|              | BACOVA_03174 |                                |
|              | BACOVA_03175 |                                |
|              | BACOVA_03176 |                                |
| 67 GntR      | BACOVA_03251 |                                |
|              | BACOVA_03252 |                                |
|              | BACOVA_03253 | susC-like                      |
|              | BACOVA_03254 | susD-like                      |
|              | BACOVA_03255 |                                |
|              | BACOVA_03256 | Glycoside Hydrolase Family 76  |

bacova\_03153-54 are induced *in vivo* in plant fed mice

|            |              |                                |
|------------|--------------|--------------------------------|
|            | BACOVA_03257 | Glycoside Hydrolase Family 76  |
|            | BACOVA_03258 | Glycoside Hydrolase Family 92  |
| 68 ECF     | BACOVA_03259 |                                |
|            | BACOVA_03283 |                                |
|            | BACOVA_03284 |                                |
|            | BACOVA_03285 |                                |
|            | BACOVA_03286 |                                |
|            | BACOVA_03287 | susC-like                      |
|            | BACOVA_03288 | susD-like                      |
| 69 unknown | BACOVA_03289 |                                |
|            | BACOVA_03317 |                                |
|            | BACOVA_03318 |                                |
|            | BACOVA_03319 |                                |
|            | BACOVA_03320 | susC-like                      |
|            | BACOVA_03321 | susD-like                      |
| 70 ECF     | BACOVA_03322 |                                |
|            | BACOVA_03337 |                                |
|            | BACOVA_03338 |                                |
|            | BACOVA_03339 | susC-like                      |
|            | BACOVA_03340 | susD-like                      |
|            | BACOVA_03341 | Glycoside Hydrolase Family 76  |
|            | BACOVA_03342 |                                |
|            | BACOVA_03343 |                                |
|            | BACOVA_03344 | Glycoside Hydrolase Family 76  |
|            | BACOVA_03345 |                                |
|            | BACOVA_03346 | Glycoside Hydrolase Family 92  |
|            | BACOVA_03347 | Glycoside Hydrolase Family 125 |

|            |              |                              |                                                              |
|------------|--------------|------------------------------|--------------------------------------------------------------|
| 71 unknown | BACOVA_03379 |                              | bacova_03379-82 are induced <i>in vivo</i> in plant fed mice |
|            | BACOVA_03380 | Glycoside Hydrolase Family 3 |                                                              |
|            | BACOVA_03381 | susD-like                    |                                                              |
|            | BACOVA_03382 | susC-like                    |                                                              |

|         |              |
|---------|--------------|
| 72 AraC | BACOVA_03386 |
|         | BACOVA_03387 |
|         | BACOVA_03388 |
|         | BACOVA_03389 |

73 HTCS

|              |                                |
|--------------|--------------------------------|
| BACOVA_03390 | Glycoside Hydrolase Family 109 |
| BACOVA_03391 |                                |
| BACOVA_03392 | Glycoside Hydrolase Family 109 |
| BACOVA_03393 |                                |
| BACOVA_03394 |                                |
| BACOVA_03395 |                                |
| BACOVA_03396 |                                |
| BACOVA_03397 | Carbohydrate Esterase 9        |
| BACOVA_03398 |                                |
| BACOVA_03399 | Glycoside Hydrolase Family 3   |
| BACOVA_03400 | Glycoside Hydrolase Family 26  |
| BACOVA_03401 |                                |
| BACOVA_03402 | susD-like                      |
| BACOVA_03403 | susC-like                      |
| BACOVA_03404 |                                |
| BACOVA_03405 |                                |
| BACOVA_03406 |                                |
| BACOVA_03417 | Glycoside Hydrolase Family 43  |
| BACOVA_03418 |                                |
| BACOVA_03419 | Glycoside Hydrolase Family 3   |
| BACOVA_03420 |                                |
| BACOVA_03421 | Glycoside Hydrolase Family 43  |
| BACOVA_03422 | Glycoside Hydrolase Family 31  |
| BACOVA_03423 | Glycoside Hydrolase Family 97  |
|              | Glycoside Hydrolase Family 43- |
| BACOVA_03424 | Carbohydrate Binding Module 6  |
| BACOVA_03425 | Glycoside Hydrolase Family 43  |
| BACOVA_03426 | susC-like                      |
| BACOVA_03427 | susD-like                      |
| BACOVA_03428 | susC-like                      |
| BACOVA_03429 | susD-like                      |
| BACOVA_03430 |                                |
| BACOVA_03431 | Glycoside Hydrolase Family 10  |
| BACOVA_03432 | Glycoside Hydrolase Family 30  |
|              | Glycoside Hydrolase Family 98- |
| BACOVA_03433 | Carbohydrate Binding Module 35 |

|         |              |                                                 |                                                                                                                                              |
|---------|--------------|-------------------------------------------------|----------------------------------------------------------------------------------------------------------------------------------------------|
|         | BACOVA_03434 | Glycoside Hydrolase Family 115                  |                                                                                                                                              |
|         | BACOVA_03435 | Carbohydrate Esterase 6-Carbohydrate Esterase 1 |                                                                                                                                              |
|         | BACOVA_03436 | Glycoside Hydrolase Family 43-                  |                                                                                                                                              |
|         | BACOVA_03437 | Carbohydrate Binding Module 6                   |                                                                                                                                              |
|         | BACOVA_03438 |                                                 |                                                                                                                                              |
|         | BACOVA_03439 | Glycoside Hydrolase Family 95                   |                                                                                                                                              |
|         | BACOVA_03440 |                                                 |                                                                                                                                              |
|         | BACOVA_03441 |                                                 |                                                                                                                                              |
|         | BACOVA_03442 |                                                 |                                                                                                                                              |
|         | BACOVA_03443 | susC-like                                       |                                                                                                                                              |
|         | BACOVA_03444 | susD-like                                       |                                                                                                                                              |
|         | BACOVA_03445 |                                                 |                                                                                                                                              |
|         | BACOVA_03446 |                                                 |                                                                                                                                              |
|         | BACOVA_03447 |                                                 |                                                                                                                                              |
|         | BACOVA_03448 |                                                 |                                                                                                                                              |
|         | BACOVA_03449 | Glycoside Hydrolase Family 115                  |                                                                                                                                              |
|         | BACOVA_03450 | Carbohydrate Esterase 6                         |                                                                                                                                              |
| 74      | BACOVA_03466 |                                                 |                                                                                                                                              |
|         | BACOVA_03467 |                                                 |                                                                                                                                              |
|         | BACOVA_03468 |                                                 |                                                                                                                                              |
|         | BACOVA_03469 |                                                 |                                                                                                                                              |
| 75 HTCS | BACOVA_03504 |                                                 |                                                                                                                                              |
|         | BACOVA_03505 |                                                 |                                                                                                                                              |
|         | BACOVA_03506 | susC-like                                       |                                                                                                                                              |
|         | BACOVA_03507 | susD-like                                       |                                                                                                                                              |
|         | BACOVA_03508 | Glycoside Hydrolase Family 16                   |                                                                                                                                              |
|         | BACOVA_03509 |                                                 |                                                                                                                                              |
|         | BACOVA_03510 |                                                 |                                                                                                                                              |
|         | BACOVA_03511 | Glycoside Hydrolase Family 2                    |                                                                                                                                              |
| 76 SusR | BACOVA_03514 | Glycoside Hydrolase Family 13                   | bacova_03514-20 are induced <i>in vivo</i> in plant fed mice<br>This PUL is homologous to <i>B. thetaiotaomicron</i> starch utilization PUL. |
|         | BACOVA_03515 |                                                 |                                                                                                                                              |
|         | BACOVA_03516 |                                                 |                                                                                                                                              |

|         |                              |                               |                                                                                                                                                                                                         |
|---------|------------------------------|-------------------------------|---------------------------------------------------------------------------------------------------------------------------------------------------------------------------------------------------------|
|         | BACOVA_03517                 | susD-like                     |                                                                                                                                                                                                         |
|         | BACOVA_03518                 | susC-like                     |                                                                                                                                                                                                         |
|         | BACOVA_03519                 | Glycoside Hydrolase Family 97 |                                                                                                                                                                                                         |
|         | BACOVA_03520                 | Glycoside Hydrolase Family 13 |                                                                                                                                                                                                         |
| 77 ECF  | BACOVA_03521                 |                               |                                                                                                                                                                                                         |
|         | BACOVA_03554                 |                               |                                                                                                                                                                                                         |
|         | BACOVA_03555                 |                               |                                                                                                                                                                                                         |
|         | BACOVA_03556                 | susC-like                     | bacova_03556-59 are induced <i>in vivo</i> in plant fed mice<br>This PUL is homologous to a <i>B. thetaiotaomicron</i> PUL associated with host glycan utilization <i>in vitro</i> and <i>in vivo</i> . |
|         | BACOVA_03557                 | susD-like                     |                                                                                                                                                                                                         |
|         | BACOVA_03558<br>BACOVA_03559 | Glycoside Hydrolase Family 18 |                                                                                                                                                                                                         |
| 78 HTCS | BACOVA_03562                 |                               |                                                                                                                                                                                                         |
|         | BACOVA_03563                 |                               |                                                                                                                                                                                                         |
|         | BACOVA_03564                 |                               |                                                                                                                                                                                                         |
|         | BACOVA_03565                 | susC-like                     |                                                                                                                                                                                                         |
|         | BACOVA_03566                 | susD-like                     |                                                                                                                                                                                                         |
|         | BACOVA_03567                 |                               |                                                                                                                                                                                                         |
|         | BACOVA_03568                 |                               |                                                                                                                                                                                                         |
|         | BACOVA_03569                 | Carbohydrate Esterase 7       |                                                                                                                                                                                                         |
| 79 none | BACOVA_03576                 | Carbohydrate Esterase 8       |                                                                                                                                                                                                         |
|         | BACOVA_03577                 | Glycoside Hydrolase Family 95 |                                                                                                                                                                                                         |
|         | BACOVA_03578                 | susC-like                     |                                                                                                                                                                                                         |
|         | BACOVA_03579                 | susD-like                     |                                                                                                                                                                                                         |
|         | BACOVA_03580                 |                               |                                                                                                                                                                                                         |
|         | BACOVA_03581                 | Carbohydrate Esterase 8       |                                                                                                                                                                                                         |
|         | BACOVA_03582                 |                               |                                                                                                                                                                                                         |
| 80 ECF  | BACOVA_03594                 |                               |                                                                                                                                                                                                         |
|         | BACOVA_03595                 |                               |                                                                                                                                                                                                         |
|         | BACOVA_03596                 | susC-like                     |                                                                                                                                                                                                         |
|         | BACOVA_03597                 | susD-like                     |                                                                                                                                                                                                         |
|         | BACOVA_03598                 |                               |                                                                                                                                                                                                         |
|         | BACOVA_03599                 |                               |                                                                                                                                                                                                         |
| 81 HTCS | BACOVA_03607                 |                               |                                                                                                                                                                                                         |

|         |              |                                |
|---------|--------------|--------------------------------|
|         | BACOVA_03608 | susC-like                      |
|         | BACOVA_03609 | susD-like                      |
|         | BACOVA_03610 |                                |
|         | BACOVA_03611 |                                |
|         | BACOVA_03612 |                                |
|         | BACOVA_03613 | Glycoside Hydrolase Family 50  |
|         | BACOVA_03614 |                                |
|         | BACOVA_03615 |                                |
|         | BACOVA_03616 | Glycoside Hydrolase Family 31  |
|         | BACOVA_03617 | Glycoside Hydrolase Family 2   |
|         | BACOVA_03618 | Carbohydrate Esterase 6        |
| 82 HTCS | BACOVA_03623 | Glycoside Hydrolase Family 92  |
|         | BACOVA_03624 |                                |
|         | BACOVA_03625 |                                |
|         | BACOVA_03626 | Glycoside Hydrolase Family 125 |
|         | BACOVA_03627 | Glycoside Hydrolase Family 76  |
|         | BACOVA_03628 |                                |
|         | BACOVA_03629 | Glycoside Hydrolase Family 92  |
|         | BACOVA_03630 |                                |
|         | BACOVA_03631 |                                |
|         | BACOVA_03632 |                                |
|         | BACOVA_03633 | Glycoside Hydrolase Family 76  |
|         | BACOVA_03634 | susC-like                      |
|         | BACOVA_03635 | susD-like                      |
|         | BACOVA_03636 |                                |
| 83 HTCS | BACOVA_03638 |                                |
|         | BACOVA_03639 | Glycoside Hydrolase Family 36  |
|         | BACOVA_03640 | Glycoside Hydrolase Family 29  |
|         | BACOVA_03641 |                                |
|         | BACOVA_03642 |                                |
|         | BACOVA_03643 | susD-like                      |
|         | BACOVA_03644 | susC-like                      |
|         | BACOVA_03645 |                                |
|         | BACOVA_03646 |                                |
| 84 ECF  | BACOVA_03855 |                                |
|         | BACOVA_03856 |                                |

|         |              |                                  |                                                                                                                                                                                                                            |
|---------|--------------|----------------------------------|----------------------------------------------------------------------------------------------------------------------------------------------------------------------------------------------------------------------------|
|         | BACOVA_03857 | susC-like (frameshift w/ _03858) |                                                                                                                                                                                                                            |
|         | BACOVA_03858 | susC-like                        |                                                                                                                                                                                                                            |
|         | BACOVA_03859 | susD-like                        |                                                                                                                                                                                                                            |
|         | BACOVA_03860 |                                  |                                                                                                                                                                                                                            |
|         | BACOVA_03861 |                                  |                                                                                                                                                                                                                            |
|         | BACOVA_03862 | Glycoside Hydrolase Family 18    |                                                                                                                                                                                                                            |
| 85 ECF  | BACOVA_04092 |                                  |                                                                                                                                                                                                                            |
|         | BACOVA_04093 |                                  |                                                                                                                                                                                                                            |
|         | BACOVA_04094 |                                  | bacova_04094-99 and bacova_04103-111 are induced <i>in vivo</i> in plant fed mice. This PUL is homologous to a <i>B. thetaiotaomicron</i> PUL associated with host glycan utilization <i>in vitro</i> and <i>in vivo</i> . |
|         | BACOVA_04095 |                                  |                                                                                                                                                                                                                            |
|         | BACOVA_04096 |                                  |                                                                                                                                                                                                                            |
|         | BACOVA_04097 | Glycoside Hydrolase Family 18    |                                                                                                                                                                                                                            |
|         | BACOVA_04098 | susD-like                        |                                                                                                                                                                                                                            |
|         | BACOVA_04099 | susC-like                        |                                                                                                                                                                                                                            |
|         | BACOVA_04100 |                                  |                                                                                                                                                                                                                            |
|         | BACOVA_04101 |                                  |                                                                                                                                                                                                                            |
|         | BACOVA_04102 |                                  |                                                                                                                                                                                                                            |
|         | BACOVA_04103 | susC-like                        | (part of above PUL)                                                                                                                                                                                                        |
|         | BACOVA_04104 | susD-like                        |                                                                                                                                                                                                                            |
|         | BACOVA_04105 | Glycoside Hydrolase Family 18    |                                                                                                                                                                                                                            |
|         | BACOVA_04106 |                                  |                                                                                                                                                                                                                            |
|         | BACOVA_04107 |                                  |                                                                                                                                                                                                                            |
|         | BACOVA_04108 | Carbohydrate Binding Module 32   |                                                                                                                                                                                                                            |
|         | BACOVA_04109 |                                  |                                                                                                                                                                                                                            |
|         | BACOVA_04110 |                                  |                                                                                                                                                                                                                            |
|         | BACOVA_04111 | Glycoside Hydrolase Family 92    |                                                                                                                                                                                                                            |
| 86 HTCS | BACOVA_04114 |                                  |                                                                                                                                                                                                                            |
|         | BACOVA_04115 | susC-like                        |                                                                                                                                                                                                                            |
|         | BACOVA_04116 | susD-like                        |                                                                                                                                                                                                                            |
|         | BACOVA_04117 | Polysaccharide Lyase Family 1    |                                                                                                                                                                                                                            |
|         | BACOVA_04118 |                                  |                                                                                                                                                                                                                            |
|         | BACOVA_04119 | Glycoside Hydrolase Family 43    |                                                                                                                                                                                                                            |
|         | BACOVA_04120 |                                  |                                                                                                                                                                                                                            |



|            |              |                                |
|------------|--------------|--------------------------------|
|            | BACOVA_04121 | Glycoside Hydrolase Family 78  |
|            | BACOVA_04122 | Glycoside Hydrolase Family 28  |
|            | BACOVA_04123 |                                |
|            | BACOVA_04124 |                                |
|            | BACOVA_04125 |                                |
|            | BACOVA_04126 | Glycoside Hydrolase Family 78- |
|            | BACOVA_04127 | Glycoside Hydrolase Family 33  |
|            | BACOVA_04128 |                                |
|            | BACOVA_04129 | Glycoside Hydrolase Family 105 |
|            | BACOVA_04130 | Glycoside Hydrolase Family 95  |
|            | BACOVA_04131 |                                |
|            | BACOVA_04132 |                                |
| 87 ECF     | BACOVA_04146 |                                |
|            | BACOVA_04147 |                                |
|            | BACOVA_04148 | susD-like                      |
|            | BACOVA_04149 | susC-like                      |
|            | BACOVA_04150 |                                |
|            | BACOVA_04151 |                                |
| 88 GntR    | BACOVA_04181 | Glycoside Hydrolase Family 3   |
|            | BACOVA_04182 |                                |
|            | BACOVA_04183 |                                |
|            | BACOVA_04184 |                                |
|            | BACOVA_04185 | susD-like                      |
|            | BACOVA_04186 | susC-like                      |
|            | BACOVA_04187 |                                |
|            | BACOVA_04188 | Glycoside Hydrolase Family 33  |
|            | BACOVA_04189 |                                |
|            | BACOVA_04190 |                                |
|            | BACOVA_04191 |                                |
| 89 unknown | BACOVA_04248 |                                |
|            | BACOVA_04249 |                                |
|            | BACOVA_04250 |                                |
|            | BACOVA_04251 |                                |
|            | BACOVA_04252 | susD-like                      |
|            | BACOVA_04253 | susC-like                      |

|            |              |                                                  |
|------------|--------------|--------------------------------------------------|
| 90 unknown | BACOVA_04292 |                                                  |
|            | BACOVA_04293 | susC-like                                        |
|            | BACOVA_04294 | susD-like                                        |
| 91 HTCS    | BACOVA_04356 |                                                  |
|            | BACOVA_04357 | Glycoside Hydrolase Family 29-                   |
|            | BACOVA_04358 | Carbohydrate Binding Module 32                   |
|            | BACOVA_04359 | Glycoside Hydrolase Family 2                     |
|            | BACOVA_04360 | Glycoside Hydrolase Family 20                    |
|            | BACOVA_04361 | susD-like                                        |
|            | BACOVA_04362 | susC-like                                        |
|            | BACOVA_04363 |                                                  |
|            | BACOVA_04364 |                                                  |
|            | BACOVA_04365 |                                                  |
|            | BACOVA_04366 |                                                  |
|            | BACOVA_04367 |                                                  |
|            | BACOVA_04368 |                                                  |
| 92 ECF     | BACOVA_04376 |                                                  |
|            | BACOVA_04377 | susD-like                                        |
|            | BACOVA_04378 | susC-like                                        |
|            | BACOVA_04379 |                                                  |
| 93 HTCS    | BACOVA_04380 |                                                  |
|            | BACOVA_04385 | Glycoside Hydrolase Family 67                    |
|            | BACOVA_04386 | Glycoside Hydrolase Family 43                    |
|            | BACOVA_04387 | Glycoside Hydrolase Family 10                    |
|            | BACOVA_04388 |                                                  |
|            | BACOVA_04389 | Carbohydrate Esterase6-Carbohydrate<br>Esterase6 |
|            | BACOVA_04390 | Glycoside Hydrolase Family 10-                   |
|            | BACOVA_04391 | Carbohydrate Binding Module 22                   |
|            | BACOVA_04392 | susD-like                                        |
|            | BACOVA_04393 | susC-like                                        |
|            | BACOVA_04394 |                                                  |
| 94 ECF     | BACOVA_04399 |                                                  |
|            | BACOVA_04400 |                                                  |

|            |              |                                |                                                                                                                                                                                                      |
|------------|--------------|--------------------------------|------------------------------------------------------------------------------------------------------------------------------------------------------------------------------------------------------|
|            | BACOVA_04401 |                                |                                                                                                                                                                                                      |
|            | BACOVA_04402 | susC-like                      |                                                                                                                                                                                                      |
|            | BACOVA_04403 | susD-like                      |                                                                                                                                                                                                      |
|            | BACOVA_04404 |                                |                                                                                                                                                                                                      |
|            | BACOVA_04405 |                                |                                                                                                                                                                                                      |
|            | BACOVA_04406 |                                |                                                                                                                                                                                                      |
| 95 unknown | BACOVA_04427 | susD-like                      |                                                                                                                                                                                                      |
|            | BACOVA_04428 | susC-like                      |                                                                                                                                                                                                      |
| 96 HTCS    | BACOVA_04477 | Polysaccharide Lyase Family 12 |                                                                                                                                                                                                      |
|            | BACOVA_04478 | susD-like                      |                                                                                                                                                                                                      |
|            | BACOVA_04479 | susC-like                      |                                                                                                                                                                                                      |
|            | BACOVA_04480 | susD-like                      |                                                                                                                                                                                                      |
|            | BACOVA_04481 | susC-like                      |                                                                                                                                                                                                      |
|            | BACOVA_04482 | Glycoside Hydrolase Family 29  |                                                                                                                                                                                                      |
|            | BACOVA_04483 |                                |                                                                                                                                                                                                      |
|            | BACOVA_04484 | Glycoside Hydrolase Family 88  |                                                                                                                                                                                                      |
| 97 HTCS    | BACOVA_04496 |                                |                                                                                                                                                                                                      |
|            | BACOVA_04497 |                                |                                                                                                                                                                                                      |
|            | BACOVA_04498 |                                |                                                                                                                                                                                                      |
|            | BACOVA_04499 |                                |                                                                                                                                                                                                      |
|            | BACOVA_04500 |                                | bacova_04497 and bacova_04500-07 are induced <i>in vivo</i> . This PUL is homologous to <i>B. thetaiotaomicron</i> fructan utilization PUL, but likely has specificity for inulin rather than levan. |
|            | BACOVA_04501 | Glycoside Hydrolase Family 32  |                                                                                                                                                                                                      |
|            | BACOVA_04502 | Glycoside Hydrolase Family 91  |                                                                                                                                                                                                      |
|            | BACOVA_04503 | Glycoside Hydrolase Family 91  |                                                                                                                                                                                                      |
|            | BACOVA_04504 | susD-like                      |                                                                                                                                                                                                      |
|            | BACOVA_04505 | susC-like                      |                                                                                                                                                                                                      |
|            | BACOVA_04506 |                                |                                                                                                                                                                                                      |
|            | BACOVA_04507 | Glycoside Hydrolase Family 32  |                                                                                                                                                                                                      |
| 98 ECF     | BACOVA_04799 |                                | bacova_04799-4811 are induced <i>in vivo</i> in plant fed mice This PUL is homologous to a <i>B. thetaiotaomicron</i> PUL                                                                            |
|            | BACOVA_04800 | Glycoside Hydrolase Family 18  |                                                                                                                                                                                                      |

associated with host glycan utilization *in vitro* and *in vivo*.

|         |              |                                |
|---------|--------------|--------------------------------|
|         | BACOVA_04801 |                                |
|         | BACOVA_04802 | Glycoside Hydrolase Family 18  |
|         | BACOVA_04803 | susD-like                      |
|         | BACOVA_04804 | susC-like                      |
|         | BACOVA_04805 |                                |
|         | BACOVA_04806 |                                |
|         | BACOVA_04807 | Glycoside Hydrolase Family 18  |
|         | BACOVA_04808 |                                |
|         | BACOVA_04809 | Glycoside Hydrolase Family 92  |
|         | BACOVA_04810 | Glycoside Hydrolase Family 92  |
|         | BACOVA_04811 |                                |
|         | BACOVA_04812 |                                |
| 99 SusR | BACOVA_04813 | Glycoside Hydrolase Family 92  |
|         | BACOVA_04864 |                                |
|         | BACOVA_04865 |                                |
|         | BACOVA_04866 |                                |
|         | BACOVA_04867 |                                |
|         | BACOVA_04868 | Glycoside Hydrolase Family 38  |
|         | BACOVA_04869 | Glycoside Hydrolase Family 92  |
|         |              | Glycoside Hydrolase Family 2-  |
|         |              | Carbohydrate Binding Module 32 |
|         | BACOVA_04870 |                                |
|         | BACOVA_04871 |                                |
|         | BACOVA_04872 | Glycoside Hydrolase Family 78  |
|         | BACOVA_04873 |                                |
|         | BACOVA_04874 | Glycoside Hydrolase Family 31  |
|         | BACOVA_04875 |                                |
|         | BACOVA_04876 | susC-like                      |
|         | BACOVA_04877 | susD-like                      |
|         | BACOVA_04878 | susC-like                      |
|         | BACOVA_04879 |                                |
|         | BACOVA_04880 |                                |
|         | BACOVA_04881 |                                |
|         | BACOVA_04882 |                                |
|         | BACOVA_04883 | Glycoside Hydrolase Family 92  |
|         | BACOVA_04884 | Glycoside Hydrolase Family 92  |

100 HTCS

|              |                                |
|--------------|--------------------------------|
| BACOVA_04900 | Glycoside Hydrolase Family 105 |
| BACOVA_04901 | Carbohydrate Esterase8         |
|              | Carbohydrate Esterase12-       |
| BACOVA_04902 | Carbohydrate Esterase 8        |
| BACOVA_04903 |                                |
| BACOVA_04904 |                                |
| BACOVA_04905 | Polysaccharide Lyase Family 1  |
| BACOVA_04906 | Polysaccharide Lyase Family 1  |
| BACOVA_04907 | Polysaccharide Lyase Family 1  |
| BACOVA_04908 | Carbohydrate Esterase 8        |
| BACOVA_04909 |                                |
| BACOVA_04910 | susD-like                      |
| BACOVA_04911 | susC-like                      |
| BACOVA_04912 |                                |
| BACOVA_04913 |                                |
| BACOVA_04914 |                                |
| BACOVA_04915 |                                |
| BACOVA_04916 | Polysaccharide Lyase Family 1  |
| BACOVA_04917 |                                |
| BACOVA_04918 |                                |
| BACOVA_04919 |                                |
| BACOVA_04920 | Polysaccharide Lyase Family 1  |
| BACOVA_04921 | susC-like                      |
| BACOVA_04922 | susD-like                      |
| BACOVA_04923 |                                |
| BACOVA_04924 |                                |
| BACOVA_04925 | Carbohydrate Esterase 8        |
| BACOVA_04926 | Glycoside Hydrolase Family 28  |
| BACOVA_04927 | Glycoside Hydrolase Family 3   |
| BACOVA_04928 |                                |
|              | Glycoside Hydrolase Family 43- |
| BACOVA_04929 | Carbohydrate Binding Module 6  |
| BACOVA_04930 |                                |
| BACOVA_04931 |                                |
| BACOVA_04945 | Glycoside Hydrolase Family 106 |
| BACOVA_04946 | Glycoside Hydrolase Family 28  |

101 HTCS

|              |                                |
|--------------|--------------------------------|
| BACOVA_04947 |                                |
| BACOVA_04948 | Glycoside Hydrolase Family 28  |
| BACOVA_04949 | Carbohydrate Esterase12        |
| BACOVA_04950 | Glycoside Hydrolase Family 2   |
|              | Glycoside Hydrolase Family 43- |
| BACOVA_04951 | Carbohydrate Binding Module 32 |
| BACOVA_04952 | Glycoside Hydrolase Family 42  |
| BACOVA_04953 |                                |
| BACOVA_04954 | Glycoside Hydrolase Family 28  |
| BACOVA_04955 |                                |
| BACOVA_04956 | susD-like                      |
| BACOVA_04957 | susC-like                      |
| BACOVA_04958 |                                |
| BACOVA_04959 |                                |
| BACOVA_04960 |                                |
| BACOVA_04961 |                                |
| BACOVA_04962 | susC-like                      |
| BACOVA_04963 | susD-like                      |
| BACOVA_04964 | susC-like                      |
| BACOVA_04965 | susD-like                      |
| BACOVA_04966 | Polysaccharide Lyase Family 11 |
| BACOVA_04967 |                                |
| BACOVA_04968 |                                |
| BACOVA_04969 |                                |
| BACOVA_04970 |                                |
| BACOVA_04971 |                                |
| BACOVA_04972 | Carbohydrate Esterase12        |
| BACOVA_04973 | Glycoside Hydrolase Family 105 |
| BACOVA_04974 | Polysaccharide Lyase Family 11 |
| BACOVA_04975 | Glycoside Hydrolase Family 105 |
| BACOVA_04976 |                                |
| BACOVA_04977 |                                |
| BACOVA_04978 | Carbohydrate Esterase 4        |
| BACOVA_04979 | Glycoside Hydrolase Family 105 |
| BACOVA_04985 |                                |
| BACOVA_04986 |                                |

|         |              |                                   |
|---------|--------------|-----------------------------------|
|         | BACOVA_04987 |                                   |
|         | BACOVA_04988 | susD-like                         |
|         | BACOVA_04989 | susC-like                         |
|         | BACOVA_04990 |                                   |
|         | BACOVA_04991 |                                   |
|         | BACOVA_04992 | Glycoside Hydrolase Family 2      |
|         | BACOVA_04993 |                                   |
|         | BACOVA_04994 |                                   |
|         | BACOVA_04995 | Polysaccharide Lyase Family 11    |
|         | BACOVA_04996 |                                   |
|         | BACOVA_04997 | Glycoside Hydrolase Family 28     |
|         | BACOVA_04998 |                                   |
|         | BACOVA_04999 |                                   |
|         | BACOVA_05000 | Polysaccharide Lyase Family 9     |
|         | BACOVA_05001 |                                   |
|         | BACOVA_05002 | Glycoside Hydrolase Family 28     |
|         | BACOVA_05003 |                                   |
|         |              | Carbohydrate Esterase 6-Glycoside |
|         | BACOVA_05004 | Hydrolase Family 105              |
|         | BACOVA_05005 | Polysaccharide Lyase Family 1     |
|         | BACOVA_05006 |                                   |
|         | BACOVA_05007 | susC-like                         |
|         | BACOVA_05008 | susD-like                         |
|         | BACOVA_05009 |                                   |
|         | BACOVA_05010 |                                   |
|         | BACOVA_05011 | susC-like                         |
|         | BACOVA_05012 | susD-like                         |
|         | BACOVA_05013 |                                   |
|         | BACOVA_05014 |                                   |
|         | BACOVA_05015 | Glycoside Hydrolase Family 28     |
|         | BACOVA_05016 |                                   |
|         |              | Glycoside Hydrolase Family 20-    |
|         | BACOVA_05141 | Carbohydrate Binding Module 32    |
|         | BACOVA_05142 |                                   |
|         | BACOVA_05143 |                                   |
|         | BACOVA_05144 |                                   |
| 103 ECF |              |                                   |

|             |              |                                |
|-------------|--------------|--------------------------------|
|             | BACOVA_05145 |                                |
|             | BACOVA_05146 |                                |
|             | BACOVA_05147 |                                |
|             | BACOVA_05148 | susD-like                      |
|             | BACOVA_05149 | susC-like                      |
|             | BACOVA_05150 |                                |
|             | BACOVA_05151 |                                |
| 104 ECF     | BACOVA_05174 |                                |
|             | BACOVA_05175 |                                |
|             | BACOVA_05176 |                                |
|             | BACOVA_05177 |                                |
|             | BACOVA_05178 | susC-like                      |
|             | BACOVA_05179 | susD-like                      |
|             | BACOVA_05180 |                                |
|             | BACOVA_05181 |                                |
|             |              | Glycoside Hydrolase Family 35- |
|             |              | Carbohydrate Binding Module 32 |
| 105 ECF     | BACOVA_05182 |                                |
|             | BACOVA_05183 | Glycoside Hydrolase Family 89  |
|             | BACOVA_05184 | susD-like                      |
|             | BACOVA_05185 |                                |
|             | BACOVA_05186 | susC-like                      |
|             | BACOVA_05187 |                                |
|             | BACOVA_05188 |                                |
|             | BACOVA_05189 |                                |
| 106 unknown | BACOVA_05278 | susC-like                      |
|             | BACOVA_05279 | susD-like                      |
|             | BACOVA_05280 |                                |
| 107 HTCS    | BACOVA_05466 |                                |
|             | BACOVA_05467 |                                |
|             | BACOVA_05468 | Polysaccharide Lyase Family 15 |
|             | BACOVA_05469 |                                |
|             | BACOVA_05470 |                                |
|             | BACOVA_05471 |                                |
|             | BACOVA_05472 |                                |
|             | BACOVA_05473 | Polysaccharide Lyase Family 12 |
|             | BACOVA_05474 | Glycoside Hydrolase Family 88  |



|             |              |                                |                                                                                |
|-------------|--------------|--------------------------------|--------------------------------------------------------------------------------|
|             | BACOVA_05475 | susD-like                      |                                                                                |
|             | BACOVA_05476 | susC-like                      |                                                                                |
|             | BACOVA_05477 |                                |                                                                                |
|             | BACOVA_05478 | Polysaccharide Lyase Family 12 |                                                                                |
|             | BACOVA_05479 |                                |                                                                                |
|             | BACOVA_05497 | Polysaccharide Lyase Family 13 |                                                                                |
| 108 HTCS    | BACOVA_05487 | Glycoside Hydrolase Family 2   |                                                                                |
|             | BACOVA_05488 | Glycoside Hydrolase Family 53  | bacova_05488-91 and bacova_05493 are induced <i>in vivo</i> in plant fed mice. |
|             | BACOVA_05489 |                                |                                                                                |
|             | BACOVA_05490 | susD-like                      |                                                                                |
|             | BACOVA_05491 | susC-like                      |                                                                                |
|             | BACOVA_05492 |                                |                                                                                |
|             | BACOVA_05493 | Glycoside Hydrolase Family 5   |                                                                                |
|             | BACOVA_05494 |                                |                                                                                |
|             | BACOVA_05495 |                                |                                                                                |
| 109 unknown | BACOVA_05542 | susC-like                      |                                                                                |
|             | BACOVA_05543 | susD-like                      |                                                                                |
| 110 ECF     | BACOVA_05556 |                                |                                                                                |
|             | BACOVA_05557 |                                |                                                                                |
|             | BACOVA_05558 |                                |                                                                                |
|             | BACOVA_05559 | susC-like                      |                                                                                |
|             | BACOVA_05560 | susD-like                      |                                                                                |
|             | BACOVA_05561 | Glycoside Hydrolase Family 18  |                                                                                |
|             | BACOVA_05562 |                                |                                                                                |
|             | BACOVA_05563 |                                |                                                                                |
|             | BACOVA_05564 |                                |                                                                                |
|             | BACOVA_05565 | Glycoside Hydrolase Family 3   |                                                                                |
| 111 ECF     | BACOVA_05573 |                                |                                                                                |
|             | BACOVA_05574 |                                |                                                                                |
|             | BACOVA_05575 |                                |                                                                                |
|             | BACOVA_05576 | susC-like                      |                                                                                |
|             | BACOVA_05577 | susD-like                      |                                                                                |
|             | BACOVA_05578 |                                |                                                                                |
|             | BACOVA_05579 |                                |                                                                                |
|             | BACOVA_05580 |                                |                                                                                |

112 HTCS

BACOVA\_05581  
BACOVA\_05611  
BACOVA\_05612  
BACOVA\_05613  
BACOVA\_05614  
BACOVA\_05615  
BACOVA\_05616  
BACOVA\_05617  
BACOVA\_05618  
BACOVA\_05619  
BACOVA\_05620  
BACOVA\_05621  
BACOVA\_05622

Glycoside Hydrolase Family 28

Carbohydrate Binding Module 6

susC-like

susD-like
