# Supplementary material for: Recognition and Degradation of Plant Cell Wall Polysaccharides by Two Human Gut Symbionts
Source: PubMed Central journal article supplement (PMC3243724; doi:10.1371/journal.pbio.1001221), 2011-12-20
Supplement: pbio.1001221.s016.pdf [file pbio.1001221.s016.pdf]

| <b>Table S7. Supplier information for carbohydrate growth array</b>                                      |                                 |                         |                      |
|----------------------------------------------------------------------------------------------------------|---------------------------------|-------------------------|----------------------|
| <b>Substrate</b>                                                                                         | <b>source</b>                   | <b>2x stock (mg/ml)</b> | <b>sterilization</b> |
| arabinose                                                                                                | Sigma A3131                     | 10                      | FS                   |
| cellobiose                                                                                               | Sigma C7252                     | 10                      | FS                   |
| fructose                                                                                                 | Sigma F0127                     | 10                      | FS                   |
| fucose                                                                                                   | Sigma F2252                     | 10                      | FS                   |
| galactose                                                                                                | Sigma G0750                     | 10                      | FS                   |
| galacturonic acid                                                                                        | Fluka 73960                     | 10                      | FS                   |
| glucosamine                                                                                              | Sigma G4875                     | 10                      | FS                   |
| glucose                                                                                                  | Sigma G8270                     | 10                      | FS                   |
| glucuronic acid                                                                                          | Sigma G8645                     | 10                      | FS                   |
| mannose                                                                                                  | Sigma M4625                     | 10                      | FS                   |
| N-acetylgalactosamine                                                                                    | Sigma A2795                     | 10                      | FS                   |
| N-acetylglucosamine                                                                                      | Sigma A3286                     | 10                      | FS                   |
| N-acetylneuraminic acid (IV-S)                                                                           | Sigma A0812                     | 10                      | FS                   |
| rhamnose                                                                                                 | Sigma R3875                     | 10                      | FS                   |
| xylose                                                                                                   | Sigma X3877                     | 10                      | FS                   |
| chondroitin sulfate (bovine trachea)                                                                     | Sigma C9819                     | 10                      | AC                   |
| heparin (porcine mucosa)                                                                                 | Sigma H0777                     | 10                      | FS                   |
| hyaluronan (rooster comb)                                                                                | Sigma H5388                     | 10                      | AC                   |
| $\alpha$ -mannan ( <i>S. cerevisiae</i> )                                                                | Sigma M7504                     | 10                      | AC                   |
| neutral mucin O-glycans (porcine mucosa)                                                                 | custom (porcine gastric mucosa) | 20                      | FS                   |
| lichenan                                                                                                 | Megazyme                        | 10                      | AC                   |
| rhamnogalacturonan II                                                                                    | custom (red wine)               | 15                      | AC                   |
| laminarin                                                                                                | Sigma L9634                     | 10                      | AC                   |
| dextran ( <i>L. mesenteroides</i> )                                                                      | Sigma D5251                     | 10                      | AC                   |
| arabinan (sugar beet)                                                                                    | Megazyme P-ARAB                 | 10                      | AC                   |
| arabinogalactan (larch)                                                                                  | Megazyme P-ARGAL                | 10                      | AC                   |
| pectic galactan (potato)                                                                                 | Megazyme P-GAPT                 | 10                      | AC                   |
| homogalacturonan (citrus peel)                                                                           | Megazyme P-GACT                 | 10                      | AC                   |
| rhamnogalacturonan I (potato pectin)                                                                     | Megazyme P-RHAM                 | 20                      | AC                   |
| arabinoxylan (wheat)                                                                                     | Megazyme P-WAXYL                | 10                      | AC                   |
| $\beta$ -glucan (barley)                                                                                 | Megazyme P-BGBL                 | 10                      | AC                   |
| galactomannan (carob)                                                                                    | Megazyme P-GALML                | 10                      | AC                   |
| glucomannan (konjac)                                                                                     | Megazyme P-GLCML                | 10                      | AC                   |
| xylan, water soluble (oat spelt)                                                                         | Fluka 95590                     | 10                      | AC                   |
| xyloglucan (tamarind)                                                                                    | Megazyme P-XYGLN                | 10                      | AC                   |
| inulin (chicory)                                                                                         | Sigma I2255                     | 10                      | AC                   |
| levan ( <i>E. herbicola</i> )                                                                            | Sigma L8647                     | 10                      | AC                   |
| pullulan ( <i>A. pullulans</i> )                                                                         | Sigma P4516                     | 10                      | AC                   |
| Glycogen                                                                                                 | sigma G0885                     | 10                      | AC                   |
| amylopectin (maize)                                                                                      | Sigma 10120                     | 10                      | AC                   |
| amylopectin (potato)                                                                                     | Sigma 10118                     | 10                      | AC                   |
| Carbohydrate sterilization methods were either by filter sterilization through a 0.22 $\mu$ filter (FS); |                                 |                         |                      |
| or by autoclaving for 15 min. at 121 degrees C (AC).                                                     |                                 |                         |                      |
