# Supplementary material for: Recognition and Degradation of Plant Cell Wall Polysaccharides by Two Human Gut Symbionts
Source: PubMed Central journal article supplement (PMC3243724; doi:10.1371/journal.pbio.1001221), 2011-12-20
Supplement: pbio.1001221.s017.pdf [file pbio.1001221.s017.pdf]

**Table S8. Microarray datasets used in this study**

| GEO series | GEO number | GEO platform | Species | Experiment description | Culture type/<br>volume | Growth<br>phase/OD <sub>600</sub> * |
|------------|------------|--------------|---------|------------------------|-------------------------|-------------------------------------|
|------------|------------|--------------|---------|------------------------|-------------------------|-------------------------------------|

\*Denotes substrate with high turbidity that prohibited accurate absorbance measurement. Where an OD<sub>600</sub> range is given, values represent the range of absorbance values based on absolute reading (high value) minus total starting turbidity (low value). In some cases only the number of hours under which a culture was incubated is shown (e.g., wheat arabinoxylan).

**New *in vitro* arrays for this study:**

|          |           |         |                       |                                       |          |                                  |
|----------|-----------|---------|-----------------------|---------------------------------------|----------|----------------------------------|
| GSE25576 | GSM628320 | GLP7006 | <i>Bt (wild-type)</i> | MM-pectic galactan (5mg/ml) #1        | Tube/5ml | mid-log/0.53-0.79*               |
| GSE25576 | GSM628321 | GLP7006 | <i>Bt (wild-type)</i> | MM-pectic galactan (5mg/ml) #2        | Tube/5ml | mid-log/0.53-0.79*               |
| GSE25576 | GSM628322 | GLP7006 | <i>Bt (wild-type)</i> | MM-homogalacturonan (5 mg/ml) #1      | Tube/5ml | mid-log/0.62                     |
| GSE25576 | GSM628323 | GLP7006 | <i>Bt (wild-type)</i> | MM-homogalacturonan (5 mg/ml) #2      | Tube/5ml | mid-log/0.62                     |
| GSE25576 | GSM628318 | GLP7006 | <i>Bt (wild-type)</i> | MM-arabinan (5 mg/ml) #1              | Tube/5ml | mid-log/0.52-0.69*               |
| GSE25576 | GSM628319 | GLP7006 | <i>Bt (wild-type)</i> | MM-arabinan (5 mg/ml) #2              | Tube/5ml | mid-log/0.49-0.66*               |
| GSE25576 | GSM628328 | GLP7006 | <i>Bt (wild-type)</i> | MM-arabinogalactan (5mg/ml) #1        | Tube/5ml | mid-log/0.59                     |
| GSE25576 | GSM628329 | GLP7006 | <i>Bt (wild-type)</i> | MM-arabinogalactan (5mg/ml) #2        | Tube/5ml | mid-log/0.61                     |
| GSE25576 | GSM628330 | GLP7006 | <i>Bt (wild-type)</i> | MM-pullulan (5 mg/ml) #1              | Tube/5ml | mid-log/0.61                     |
| GSE25576 | GSM628331 | GLP7006 | <i>Bt (wild-type)</i> | MM-pullulan (5 mg/ml) #2              | Tube/5ml | mid-log/0.59                     |
| GSE25576 | GSM628324 | GLP7006 | <i>Bt (wild-type)</i> | MM-1% rhamnogalacturonan I (10 mg/ml) | Tube/5ml | mid-log/0.52                     |
| GSE25576 | GSM628325 | GLP7006 | <i>Bt (wild-type)</i> | MM-1% rhamnogalacturonan I (10 mg/ml) | Tube/5ml | mid-log/0.53                     |
| GSE25576 | GSM628326 | GLP7006 | <i>Bt (wild-type)</i> | MM-1.5% rhamnogalacturonan II         | Tube/5ml | mid-log/0.37                     |
| GSE25576 | GSM628327 | GLP7006 | <i>Bt (wild-type)</i> | MM-1.5% rhamnogalacturonan II         | Tube/5ml | mid-log/0.38                     |
| GSE25576 | GSM628389 | GLP9803 | <i>Bo (wild-type)</i> | MM-glucose (5mg/ml) #1                | Tube/5ml | mid-log/0.65                     |
| GSE25576 | GSM628390 | GLP9803 | <i>Bo (wild-type)</i> | MM-glucose (5mg/ml) #2                | Tube/5ml | mid-log/0.60                     |
| GSE25576 | GSM628395 | GLP9803 | <i>Bo (wild-type)</i> | MM-xyloglucan (5mg/ml) #1             | Tube/5ml | mid-log/0.64                     |
| GSE25576 | GSM628396 | GLP9803 | <i>Bo (wild-type)</i> | MM-xyloglucan (5mg/ml) #2             | Tube/5ml | mid-log/0.60                     |
| GSE25576 | GSM628401 | GLP9803 | <i>Bo (wild-type)</i> | MM-beta glucan (5mg/ml) #1            | Tube/5ml | mid-log/0.62                     |
| GSE25576 | GSM628402 | GLP9803 | <i>Bo (wild-type)</i> | MM-beta glucan (5mg/ml) #2            | Tube/5ml | mid-log/0.60                     |
| GSE25576 | GSM628393 | GLP9803 | <i>Bo (wild-type)</i> | MM-wheat arabinoxylan (5mg/ml) #1     | Tube/5ml | mid-log/12-hour                  |
| GSE25576 | GSM628394 | GLP9803 | <i>Bo (wild-type)</i> | MM-wheat arabinoxylan (5mg/ml) #2     | Tube/5ml | mid-log/12-hour                  |
| GSE25576 | GSM628397 | GLP9803 | <i>Bo (wild-type)</i> | MM-glucomannan (5mg/ml) #1            | Tube/5ml | mid-log/0.62                     |
| GSE25576 | GSM628398 | GLP9803 | <i>Bo (wild-type)</i> | MM-glucomannan (5mg/ml) #2            | Tube/5ml | mid-log/0.59                     |
| GSE25576 | GSM628399 | GLP9803 | <i>Bo (wild-type)</i> | MM-galactomannan (5mg/ml) #1          | Tube/5ml | mid-log/0.63                     |
| GSE25576 | GSM628400 | GLP9803 | <i>Bo (wild-type)</i> | MM-galactomannan (5mg/ml) #2          | Tube/5ml | mid-log/0.64                     |
| GSE25576 | GSM628391 | GLP9803 | <i>Bo (wild-type)</i> | MM-oat spelt xylan (OSX) (5mg/ml) #1  | Tube/5ml | mid-log/0.40 (*turbid substrate) |
| GSE25576 | GSM628392 | GLP9803 | <i>Bo (wild-type)</i> | MM-oat spelt xylan (OSX) (5mg/ml) #2  | Tube/5ml | mid-log/0.38 (*turbid substrate) |
| GSE25576 | GSM628403 | GLP9803 | <i>Bo (wild-type)</i> | MM-homogalacturonan (5mg/ml) #1       | Tube/5ml | mid-log/0.61                     |
| GSE25576 | GSM628404 | GLP9803 | <i>Bo (wild-type)</i> | MM-homogalacturonan (5mg/ml) #2       | Tube/5ml | mid-log/0.60                     |

**New *in vivo* arrays for this study:**

|          |           |         |                       |                                               |     |                                                  |
|----------|-----------|---------|-----------------------|-----------------------------------------------|-----|--------------------------------------------------|
| GSE25576 | GSM628405 | GLP9803 | <i>Bo</i> (wild-type) | <i>in vivo</i> NMRI cecal; plant rich diet #1 | N/A | <i>in vivo</i> ; NMRI cecum, plant rich diet 1/1 |
| GSE25576 | GSM628406 | GLP9803 | <i>Bo</i> (wild-type) | <i>in vivo</i> NMRI cecal; plant rich diet #2 | N/A | <i>in vivo</i> ; NMRI cecum, plant rich diet 1/2 |
| GSE25576 | GSM628407 | GLP9803 | <i>Bo</i> (wild-type) | <i>in vivo</i> NMRI cecal; plant rich diet #3 | N/A | <i>in vivo</i> ; NMRI cecum, plant rich diet 1/3 |

***In vitro* arrays included from previous studies:**

|          |           |         |                       |                                                                   |          |                                      |
|----------|-----------|---------|-----------------------|-------------------------------------------------------------------|----------|--------------------------------------|
| GSE11980 | GSM302686 | GPL7006 | <i>Bt</i> (wild-type) | Minimal medium plus glucose 0.5% (w/v); replicate 1/2             | Tube/5ml | middle logarithmic growth phase/0.62 |
| GSE11980 | GSM302791 | GPL7006 | <i>Bt</i> (wild-type) | Minimal medium plus glucose 0.5% (w/v); replicate 2/2             | Tube/5ml | middle logarithmic growth phase/0.64 |
| GSE11980 | GSM302800 | GPL7006 | <i>Bt</i> (wild-type) | Minimal medium plus chondroitin sulfate 0.5% (w/v); replicate 1/2 | Tube/5ml | middle logarithmic growth phase/0.65 |
| GSE11980 | GSM302801 | GPL7006 | <i>Bt</i> (wild-type) | Minimal medium plus chondroitin sulfate 0.5% (w/v); replicate 2/2 | Tube/5ml | middle logarithmic growth phase/0.68 |
| GSE11980 | GSM302802 | GPL7006 | <i>Bt</i> (wild-type) | Minimal medium plus hyaluronan 0.5% (w/v); replicate 1/2          | Tube/5ml | middle logarithmic growth phase/0.67 |
| GSE11980 | GSM302803 | GPL7006 | <i>Bt</i> (wild-type) | Minimal medium plus hyaluronan 0.5% (w/v); replicate 2/2          | Tube/5ml | middle logarithmic growth phase/0.62 |
| GSE11980 | GSM302804 | GPL7006 | <i>Bt</i> (wild-type) | Minimal medium plus heparin 0.5% (w/v); replicate 1/2             | Tube/5ml | middle logarithmic growth phase/0.62 |
| GSE11980 | GSM302805 | GPL7006 | <i>Bt</i> (wild-type) | Minimal medium plus heparin 0.5% (w/v); replicate 2/2             | Tube/5ml | middle logarithmic growth phase/0.55 |
| GSE11980 | GSM302806 | GPL7006 | <i>Bt</i> (wild-type) | Minimal medium plus $\alpha$ -mannan 0.5% (w/v); replicate 1/2    | Tube/5ml | middle logarithmic growth phase/0.59 |
| GSE11980 | GSM302807 | GPL7006 | <i>Bt</i> (wild-type) | Minimal medium plus $\alpha$ -mannan 0.5% (w/v); replicate 2/2    | Tube/5ml | middle logarithmic growth phase/0.60 |
| GSE11980 | GSM301720 | GPL1821 | <i>Bt</i> (wild-type) | Minimal medium plus glucose 0.5% (w/v); replicate 1/2             | Tube/5ml | middle logarithmic growth phase/0.62 |
| GSE11980 | GSM301721 | GPL1821 | <i>Bt</i> (wild-type) | Minimal medium plus glucose 0.5% (w/v); replicate 2/2             | Tube/5ml | middle logarithmic growth phase/0.64 |
| GSE11980 | GSM301722 | GPL1821 | <i>Bt</i> (wild-type) | Minimal medium plus 0.5% (w/v) neutral PMG glycans; replicate 1/2 | Tube/5ml | middle logarithmic growth phase/0.59 |
| GSE11980 | GSM301731 | GPL1821 | <i>Bt</i> (wild-type) | Minimal medium plus 0.5% (w/v) neutral PMG glycans; replicate 2/2 | Tube/5ml | middle logarithmic growth phase/0.63 |

***In vivo* arrays included from previous studies:**

|         |          |         |                       |                                                                                |     |     |
|---------|----------|---------|-----------------------|--------------------------------------------------------------------------------|-----|-----|
| GSE2231 | GSM40886 | GPL1821 | <i>Bt</i> (wild-type) | Cecal bacterial population from adult NMRI inbred mouse fed simple sugar diet; | N/A | N/A |
| GSE2231 | GSM40887 | GPL1821 | <i>Bt</i> (wild-type) | Cecal bacterial population from adult NMRI inbred mouse fed simple sugar diet; | N/A | N/A |
| GSE2231 | GSM40888 | GPL1821 | <i>Bt</i> (wild-type) | Cecal bacterial population from adult NMRI inbred mouse fed simple sugar diet; | N/A | N/A |

|         |           |         |                       |                                                                                                              |     |     |
|---------|-----------|---------|-----------------------|--------------------------------------------------------------------------------------------------------------|-----|-----|
| GSE5279 | GSM119522 | GPL1821 | <i>Bt</i> (wild-type) | Pooled cecal bacterial populations from 17 day-old NMRI inbred mice suckling on mother's milk; replicate 1/6 | N/A | N/A |
| GSE5279 | GSM119523 | GPL1821 | <i>Bt</i> (wild-type) | Pooled cecal bacterial populations from 17 day-old NMRI inbred mice suckling on mother's milk; replicate 2/6 | N/A | N/A |
| GSE5279 | GSM119524 | GPL1821 | <i>Bt</i> (wild-type) | Pooled cecal bacterial populations from 17 day-old NMRI inbred mice suckling on mother's milk; replicate 3/6 | N/A | N/A |
| GSE5279 | GSM119525 | GPL1821 | <i>Bt</i> (wild-type) | Pooled cecal bacterial populations from 17 day-old NMRI inbred mice suckling on mother's milk; replicate 4/6 | N/A | N/A |
| GSE5279 | GSM119526 | GPL1821 | <i>Bt</i> (wild-type) | Pooled cecal bacterial populations from 17 day-old NMRI inbred mice suckling on mother's milk; replicate 5/6 | N/A | N/A |
| GSE5279 | GSM119527 | GPL1821 | <i>Bt</i> (wild-type) | Pooled cecal bacterial populations from 17 day-old NMRI inbred mice suckling on mother's milk; replicate 6/6 | N/A | N/A |
| GSE2231 | GSM40892  | GPL1821 | <i>Bt</i> (wild-type) | Cecal bacterial population from adult NMRI inbred mouse fed plant rich diet; replicate                       | N/A | N/A |
| GSE2231 | GSM40893  | GPL1821 | <i>Bt</i> (wild-type) | Cecal bacterial population from adult NMRI inbred mouse fed plant rich diet; replicate                       | N/A | N/A |
| GSE2231 | GSM40894  | GPL1821 | <i>Bt</i> (wild-type) | Cecal bacterial population from adult NMRI inbred mouse fed plant rich diet; replicate                       | N/A | N/A |
| GSE2231 | GSM40895  | GPL1821 | <i>Bt</i> (wild-type) | Cecal bacterial population from adult NMRI inbred mouse fed plant rich diet; replicate                       | N/A | N/A |
| GSE2231 | GSM40896  | GPL1821 | <i>Bt</i> (wild-type) | Cecal bacterial population from adult NMRI inbred mouse fed plant rich diet; replicate                       | N/A | N/A |
| GSE2231 | GSM40891  | GPL1821 | <i>Bt</i> (wild-type) | Cecal bacterial population from adult NMRI inbred mouse fed plant rich diet; replicate                       | N/A | N/A |
| GSE2231 | GSM40889  | GPL1821 | <i>Bt</i> (wild-type) | Cecal bacterial population from adult NMRI inbred mouse fed plant rich diet; replicate                       | N/A | N/A |
| GSE2231 | GSM40890  | GPL1821 | <i>Bt</i> (wild-type) | Cecal bacterial population from adult NMRI inbred mouse fed plant rich diet; replicate                       | N/A | N/A |
| GSE2231 | GSM40885  | GPL1821 | <i>Bt</i> (wild-type) | Cecal bacterial population from adult NMRI inbred mouse fed plant rich diet; replicate                       | N/A | N/A |
