# Supplementary material for: Recognition and Degradation of Plant Cell Wall Polysaccharides by Two Human Gut Symbionts
Source: PLoS Biol. 2011 Dec 20;9(12):e1001221. doi: 10.1371/journal.pbio.1001221 (PMC3243724; doi:10.1371/journal.pbio.1001221)
Supplement: Table S2 — Glycan degrading enzymes encoded in B. thetaiotaomicron and B. ovatus PULs. Glycan degrading enzymes are listed as annotated in the CAZy database [14]. Predicted target linkages are based on the known activities within each CAZy family and the linkages known to be present in the substrate presented for growth. (PDF) [file pbio.1001221.s011.pdf]

**Table S2. Glycan degrading enzymes encoded in *B. thetaiotaomicron* and *B. ovatus* PULs**

| PUL                    | Primary substrate                   | CAZy family<br>(number in<br>PUL ) | Predicted target linkage(s)                                    |
|------------------------|-------------------------------------|------------------------------------|----------------------------------------------------------------|
| BT3674-87              | arabinogalactan                     | GH16 (1)                           | unknown                                                        |
|                        |                                     | GH43 (2)                           | $\beta$ 1,3-gal, $\alpha$ -L-ara                               |
|                        |                                     | GH105 (1)                          | $\alpha$ 1,2-L-rha- $\alpha$ 1,4-galA                          |
| BT0262-90              | arabinogalactan                     | GH35 (1)                           | $\beta$ -gal                                                   |
|                        |                                     | GH43 (2)                           | $\beta$ -gal, $\alpha$ -L-ara                                  |
| BT0348-69              | arabinan                            | GH43 (3)                           | $\alpha$ -L-ara <sup>2</sup>                                   |
|                        |                                     | GH51 (2)                           | $\alpha$ -L-ara                                                |
| BT3043-48              | arabinan                            | GH30 (1)                           | unknown                                                        |
| BT4145-83              | rhamnogalacturonan I                | GH2 (3)                            | $\beta$ -gal                                                   |
|                        |                                     | GH27 (1)                           | unknown                                                        |
|                        |                                     | GH28 (4)                           | $\alpha$ 1,4-galA; $\alpha$ 1,2-L-rha- $\alpha$ 1,4-galA       |
|                        |                                     | GH42 (1)                           | $\beta$ -gal                                                   |
|                        |                                     | GH105 (2)                          | L-rha- $\alpha$ 1,4-galA                                       |
|                        |                                     | GH106 (1)                          | $\alpha$ -L-rha                                                |
|                        |                                     | PL9 (2)                            | $\alpha$ 1,4-galA                                              |
|                        |                                     | PL11 (1)                           | $\alpha$ 1,2-L-rha- $\alpha$ 1,4-galA                          |
|                        |                                     | CE4 (2)                            | acetyl-GalA                                                    |
|                        |                                     | CE6 (1)                            | acetyl-GalA                                                    |
|                        |                                     | CE12 (2)                           | acetyl-GalA                                                    |
| BT0077-30 <sup>1</sup> | rhamnogalacturonan II               | GH2 (4)                            | $\beta$ -gal                                                   |
|                        |                                     | GH28 (1)                           | galA- $\alpha$ 1,4-galA; $\alpha$ 1,2-L-rha- $\alpha$ 1,4-galA |
|                        |                                     | GH33 (1)                           | unknown                                                        |
|                        |                                     | GH43 (1)                           | $\beta$ -gal, $\alpha$ -L-ara, $\beta$ -xyl                    |
|                        |                                     | GH78 (3)                           | $\alpha$ -L-rha                                                |
|                        |                                     | GH95 (1)                           | $\alpha$ 1,2-L-fuc                                             |
|                        |                                     | GH105 (1)                          | L-rha- $\alpha$ 1,4-galA                                       |
|                        |                                     | GH106 (1)                          | $\alpha$ -L-rha                                                |
|                        |                                     | PL1 (1)                            | $\alpha$ 1,4-galA                                              |
|                        |                                     | not classified (13)                | unknown                                                        |
| BT4667-72 <sup>1</sup> | pectic galactan                     | GH2 (1)                            | $\beta$ -gal                                                   |
|                        |                                     | GH53 (1)                           | $\beta$ 1,4-gal                                                |
| BT4108-23 <sup>1</sup> | homogalacturonan                    | GH28 (1)                           | galA- $\alpha$ 1,4-galA; $\alpha$ 1,2-L-rha- $\alpha$ 1,4-galA |
|                        |                                     | GH105 (1)                          | L-rha- $\alpha$ 1,4-galA                                       |
|                        |                                     | PL1 (3)                            | $\alpha$ 1,4-galA <sup>3</sup>                                 |
|                        |                                     | CE8 (2)                            | methyl-galA                                                    |
| Bacova_02087-97        | galacto- and glucomannan            | GH26 (2)                           | $\beta$ -man                                                   |
|                        |                                     | GH36 (1)                           | $\alpha$ -gal                                                  |
| Bacova_02640-59        | xyloglucan                          | GH2 (1)                            | $\beta$ -gal                                                   |
|                        |                                     | GH3 (2)                            | $\beta$ -glu                                                   |
|                        |                                     | GH5 (1)                            | $\beta$ -glu                                                   |
|                        |                                     | GH9 (1)                            | $\beta$ -glu                                                   |
|                        |                                     | GH31 (1)                           | $\alpha$ -xyl                                                  |
|                        |                                     | GH43 (2)                           | $\beta$ -gal                                                   |
| Bacova_02738-46        | $\beta$ -glucan                     | GH3 (2)                            | $\beta$ -glu                                                   |
|                        |                                     | GH16 (1)                           | $\beta$ -glu                                                   |
| Bacova_00942-46        | $\beta$ -glucan                     | GH30 (1)                           | $\beta$ -glu                                                   |
|                        |                                     | GH3 (1)                            | $\beta$ -glu                                                   |
| Bacova_03411-50        | Wheat arabinoxylan, oat spelt xylan | GH3 (1)                            | $\beta$ 1,4-xyl                                                |
|                        |                                     | GH10 (1)                           | $\beta$ 1,4-xyl                                                |
|                        |                                     | GH30 (1)                           | $\beta$ 1,4-xyl (glucuronoxylan-specific)                      |
|                        |                                     | GH31 (1)                           | unknown                                                        |
|                        |                                     | GH43 (5)                           | $\beta$ 1,4-xyl, $\alpha$ -L-ara                               |
|                        |                                     | GH95 (1)                           | $\alpha$ -L-fuc                                                |
|                        |                                     | GH97 (1)                           | unknown                                                        |
|                        |                                     | GH98 (1)                           | unknown                                                        |
|                        |                                     | GH115 (2)                          | glcA- $\alpha$ 1,2-xyl                                         |
|                        |                                     | CE1 (1)                            | acetyl-xyl; feruloyl-ara                                       |
|                        |                                     | CE6 (2)                            | acetyl-xyl                                                     |
| Bacova_04384-94        | Wheat arabinoxylan, oat spelt xylan | GH10 (2)                           | $\beta$ 1,4-xyl <sup>4</sup>                                   |
|                        |                                     | GH43 (1)                           | $\beta$ 1,4-xyl <sup>4</sup>                                   |
|                        |                                     | GH67 (1)                           | glcA- $\alpha$ 1,2-xyl                                         |
|                        |                                     | CE6 (1)                            | acetyl-xyl                                                     |

<sup>1</sup>Denotes a *B. thetaiotaomicron* PUL that is conserved in *B. ovatus*<sup>2</sup>Arabinan specific activity of all three GH43s (BT0360, BT0367 and BT0369) from this PUL was shown experimentally [23].<sup>3</sup>BT4116 PL1 displays activity vs homogalacturonan (**Fig. S2**)<sup>4</sup>Xylanase and xylosidase activity has been demonstrated experimentally for one of the GH10s (Bacova\_04387) and the GH43 (Bacova\_04386), respectively, from this PUL [25].
