# Supplementary material for: Recognition and Degradation of Plant Cell Wall Polysaccharides by Two Human Gut Symbionts
Source: PLoS Biol. 2011 Dec 20;9(12):e1001221. doi: 10.1371/journal.pbio.1001221 (PMC3243724; doi:10.1371/journal.pbio.1001221)
Supplement: Table S6 — Comparison of homologous PULs between B. thetaiotaomicron and B. ovatus. Dark green lines delineate “homologous PULs.” Light green lines delineate “probably homologous PULs.” Yellow lines delineate genes immediately adjacent to PULs that are syntenic best Blast hits. Gray lines delineate genes within homologous PULs that are not best Blast hits. (PDF) [file pbio.1001221.s015.pdf]

**Table S6. Comparison of homologous PULs between *B. thetaiotaomicron* (Bt) and *B. ovatus* (Bo)**

Dark green lines delineate "homologous PULs"

Light green lines delineate "probably homologous PULs"

Yellow lines delineate gene immediately adjacent to PULs that are syntenic best Blast hits

Gray lines delineate genes within homologous PULs that are not best Blast hits

| Homologous PUL number | Bt gene | Bo gene      |
|-----------------------|---------|--------------|
| 1                     | BT0139  | BACOVA_01298 |
|                       | BT0140  | BACOVA_01297 |
|                       | BT0141  | BACOVA_03566 |
|                       | BT0142  | BACOVA_03567 |
|                       | BT0143  | BACOVA_01294 |
|                       | BT0145  | BACOVA_01293 |
|                       | BT0146  | BACOVA_01292 |
|                       | BT0147  | BACOVA_01290 |
|                       | BT0148  | BACOVA_01289 |
|                       | BT0149  | BACOVA_01288 |
|                       | BT0150  | BACOVA_01287 |
|                       | BT0151  | BACOVA_01286 |
|                       | BT0152  | BACOVA_01285 |
|                       | BT0153  | BACOVA_01284 |
|                       | BT0154  | BACOVA_01283 |
|                       | BT0155  | BACOVA_01282 |
|                       | BT0156  | BACOVA_01281 |
| 2                     | BT0178  | BACOVA_01262 |
|                       | BT0179  | BACOVA_01261 |
|                       | BT0180  | BACOVA_01260 |
|                       | BT0181  | BACOVA_01259 |
|                       | BT0182  | BACOVA_01257 |
|                       | BT0183  | BACOVA_01256 |
|                       | BT0184  | BACOVA_01255 |
|                       | BT0185  | BACOVA_01254 |
|                       | BT0186  | BACOVA_01253 |
|                       | BT0187  | BACOVA_01252 |
|                       | BT0188  | BACOVA_01251 |
|                       | BT0189  | BACOVA_01250 |
|                       | BT0190  | BACOVA_01248 |
|                       | BT0191  | BACOVA_01247 |
|                       | BT0192  | BACOVA_01246 |
|                       | BT0193  | BACOVA_01245 |
|                       | BT0194  | BACOVA_01244 |
|                       | BT0195  | BACOVA_01243 |
|                       | BT0196  | BACOVA_05581 |
|                       | BT0197  | BACOVA_01239 |
|                       | BT0198  | BACOVA_01238 |
|                       | BT0199  | BACOVA_01237 |
|                       | BT0200  | BACOVA_01235 |
|                       | BT0201  | BACOVA_01234 |
|                       | BT0202  | BACOVA_01233 |

|   |        |              |
|---|--------|--------------|
|   | BT0203 | BACOVA_01232 |
|   | BT0204 | BACOVA_01231 |
|   | BT0205 | BACOVA_01230 |
| 3 | BT0206 | BACOVA_01228 |
|   | BT0207 | BACOVA_01227 |
|   | BT0208 | BACOVA_01226 |
|   | BT0209 | BACOVA_01225 |
|   | BT0210 | BACOVA_01224 |
|   | BT0212 | BACOVA_00373 |
|   | BT0213 | BACOVA_00374 |
|   | BT0214 | BACOVA_00375 |
|   | BT0216 | BACOVA_00378 |
|   | BT0217 | BACOVA_00379 |
|   | BT0218 | BACOVA_00380 |
|   | BT0219 | BACOVA_00381 |

|   |        |              |
|---|--------|--------------|
|   | BT0743 | BACOVA_02478 |
|   | BT0744 | BACOVA_02479 |
|   | BT0745 | BACOVA_02480 |
|   | BT0746 | BACOVA_02481 |
|   | BT0747 | BACOVA_02482 |
|   | BT0748 | BACOVA_02484 |
|   | BT0749 | BACOVA_02485 |
|   | BT0750 | BACOVA_02486 |
|   | BT0751 | BACOVA_02487 |
| 4 | BT0752 | BACOVA_02488 |
|   | BT0753 | BACOVA_02489 |
|   | BT0754 | BACOVA_02490 |
|   | BT0755 | BACOVA_02491 |
|   | BT0756 | BACOVA_02492 |
|   | BT0757 | BACOVA_02493 |

|   |        |              |
|---|--------|--------------|
|   | BT0972 | BACOVA_00778 |
|   | BT0973 | BACOVA_00779 |
|   | BT0974 | BACOVA_00780 |
|   | BT0975 | BACOVA_00781 |
|   | BT0976 | BACOVA_00782 |
|   | BT0977 | BACOVA_00783 |
|   | BT0978 | BACOVA_00784 |
| 5 | BT0979 | BACOVA_00785 |
|   | BT0980 | BACOVA_00786 |
|   | BT0981 | BACOVA_00787 |
|   | BT0983 | BACOVA_00788 |
|   | BT0984 | BACOVA_00162 |
|   | BT0985 | BACOVA_00163 |
|   | BT0986 | BACOVA_00164 |
|   | BT0987 | BACOVA_01291 |
|   | BT0988 | BACOVA_00178 |
|   | BT0989 | BACOVA_00179 |
|   | BT0990 | BACOVA_00180 |

|   |        |              |
|---|--------|--------------|
|   | BT0992 | BACOVA_00181 |
|   | BT0993 | BACOVA_00182 |
|   | BT0996 | BACOVA_00184 |
|   | BT0997 | BACOVA_00268 |
|   | BT0998 | BACOVA_00270 |
|   | BT0999 | BACOVA_00271 |
|   | BT1000 | BACOVA_02584 |
|   | BT1001 | BACOVA_00285 |
|   | BT1002 | BACOVA_00286 |
|   | BT1003 | BACOVA_00287 |
|   | BT1004 | BACOVA_00288 |
|   | BT1010 | BACOVA_04129 |
|   | BT1011 | BACOVA_04128 |
|   | BT1012 | BACOVA_04127 |
|   | BT1013 | BACOVA_04126 |
|   | BT1014 | BACOVA_02700 |
|   | BT1015 | BACOVA_04124 |
|   | BT1017 | BACOVA_04123 |
|   | BT1018 | BACOVA_04122 |
|   | BT1019 | BACOVA_04121 |
|   | BT1020 | BACOVA_04120 |
|   | BT1021 | BACOVA_04119 |
|   | BT1022 | BACOVA_04118 |
|   | BT1023 | BACOVA_04117 |
|   | BT1028 | BACOVA_04116 |
|   | BT1029 | BACOVA_04115 |
|   | BT1030 | BACOVA_04114 |
|   | BT1031 | BACOVA_04113 |
| 6 | BT1032 | BACOVA_04111 |
|   | BT1033 | BACOVA_04110 |
|   | BT1034 | BACOVA_04109 |
|   | BT1035 | BACOVA_04108 |
|   | BT1041 | BACOVA_04100 |
|   | BT1046 | BACOVA_04099 |
|   | BT1047 | BACOVA_04098 |
|   | BT1048 | BACOVA_04097 |
|   | BT1049 | BACOVA_04096 |
|   | BT1050 | BACOVA_04095 |
|   | BT1052 | BACOVA_04093 |
|   | BT1053 | BACOVA_04092 |
|   | BT1054 | BACOVA_04090 |
|   | BT1055 | BACOVA_04089 |
|   | BT1056 | BACOVA_04088 |
|   | BT1057 | BACOVA_04087 |
|   | BT1058 | BACOVA_04086 |
|   | BT1059 | BACOVA_04084 |
|   | BT1060 | BACOVA_04083 |
|   | BT1061 | BACOVA_04082 |
|   | BT1263 | BACOVA_03843 |

|   |        |                             |
|---|--------|-----------------------------|
|   | BT1264 | BACOVA_03846                |
|   | BT1270 | BACOVA_03847                |
|   | BT1271 | BACOVA_03848                |
|   | BT1272 | BACOVA_03849                |
|   | BT1273 | BACOVA_03850                |
|   | BT1274 | BACOVA_03851                |
|   | BT1275 | BACOVA_03852                |
|   | BT1276 | BACOVA_03853                |
|   | BT1277 | BACOVA_03854                |
| 7 | BT1278 | BACOVA_03855                |
|   | BT1279 | BACOVA_03856                |
|   | BT1280 | BACOVA_03857/8 (frameshift) |
|   | BT1281 | BACOVA_03859                |
|   | BT1282 | BACOVA_00158                |
|   | BT1283 | BACOVA_01339                |
|   | BT1284 | BACOVA_00159                |
|   | BT1286 | BACOVA_03863                |
|   | BT1287 | BACOVA_03864                |

|   |        |              |
|---|--------|--------------|
| 8 | BT1439 | BACOVA_00865 |
|   | BT1440 | BACOVA_00866 |
|   | BT1441 | BACOVA_00867 |
|   | BT1442 | BACOVA_00868 |
|   | BT1443 | BACOVA_00871 |
|   | BT1444 | BACOVA_00872 |
|   | BT1445 | BACOVA_00873 |
|   | BT1446 | BACOVA_00874 |
|   | BT1447 | BACOVA_00875 |
|   | BT1448 | BACOVA_00876 |
|   | BT1449 | BACOVA_00877 |

|   |        |              |
|---|--------|--------------|
|   | BT1541 | BACOVA_04279 |
|   | BT1542 | BACOVA_04280 |
|   | BT1543 | BACOVA_04281 |
|   | BT1544 | BACOVA_04284 |
|   | BT1545 | BACOVA_04285 |
|   | BT1546 | BACOVA_04287 |
|   | BT1547 | BACOVA_04288 |
|   | BT1548 | BACOVA_04289 |
|   | BT1549 | BACOVA_04290 |
|   | BT1550 | BACOVA_04291 |
| 9 | BT1551 | BACOVA_04292 |
|   | BT1552 | BACOVA_04293 |
|   | BT1553 | BACOVA_04294 |
|   | BT1554 | BACOVA_04297 |
|   | BT1555 | BACOVA_04298 |
|   | BT1556 | BACOVA_04299 |
|   | BT1557 | BACOVA_04300 |
|   | BT1558 | BACOVA_04301 |
|   | BT1559 | BACOVA_04302 |

|  |        |              |
|--|--------|--------------|
|  | BT1560 | BACOVA_04303 |
|  | BT1561 | BACOVA_04304 |
|  | BT1562 | BACOVA_04305 |
|  | BT1563 | BACOVA_04306 |

|    |        |              |
|----|--------|--------------|
|    | BT1672 | BACOVA_04415 |
|    | BT1673 | BACOVA_04416 |
|    | BT1674 | BACOVA_04417 |
|    | BT1675 | BACOVA_04419 |
|    | BT1676 | BACOVA_04420 |
|    | BT1677 | BACOVA_04421 |
|    | BT1678 | BACOVA_04422 |
|    | BT1679 | BACOVA_04423 |
|    | BT1680 | BACOVA_04424 |
|    | BT1681 | BACOVA_04426 |
| 10 | BT1682 | BACOVA_04427 |
|    | BT1683 | BACOVA_04428 |
|    | BT1684 | BACOVA_04429 |
|    | BT1685 | BACOVA_04430 |
|    | BT1686 | BACOVA_04431 |
|    | BT1687 | BACOVA_04432 |
|    | BT1688 | BACOVA_04433 |
|    | BT1689 | BACOVA_04434 |
|    | BT1691 | BACOVA_04436 |
|    | BT1692 | BACOVA_04437 |

|    |        |              |
|----|--------|--------------|
|    | BT1745 | BACOVA_04487 |
|    | BT1746 | BACOVA_04489 |
|    | BT1747 | BACOVA_04490 |
|    | BT1749 | BACOVA_04491 |
|    | BT1750 | BACOVA_04492 |
|    | BT1751 | BACOVA_04493 |
|    | BT1753 | BACOVA_04494 |
| 11 | BT1754 | BACOVA_04496 |
|    | BT1757 | BACOVA_04498 |
|    | BT1758 | BACOVA_04500 |
|    | BT1759 | BACOVA_04501 |
|    | BT1762 | BACOVA_04504 |
|    | BT1763 | BACOVA_04505 |
|    | BT1764 | BACOVA_04506 |
|    | BT1765 | BACOVA_04507 |

|    |        |              |
|----|--------|--------------|
| 12 | BT2032 | BACOVA_00682 |
|    | BT2033 | BACOVA_00681 |
|    | BT2034 | BACOVA_00680 |
|    | BT2035 | BACOVA_00679 |
|    | BT2037 | BACOVA_00677 |
|    | BT2038 | BACOVA_00676 |
|    | BT2039 | BACOVA_00675 |
|    | BT2040 | BACOVA_00674 |

|  |        |              |
|--|--------|--------------|
|  | BT2041 | BACOVA_00672 |
|  | BT2042 | BACOVA_00671 |
|  | BT2043 | BACOVA_00670 |

|  |        |              |
|--|--------|--------------|
|  | BT2159 | BACOVA_03187 |
|  | BT2160 | BACOVA_03186 |
|  | BT2161 | BACOVA_03185 |
|  | BT2162 | BACOVA_03184 |
|  | BT2163 | BACOVA_03183 |
|  | BT2164 | BACOVA_03182 |
|  | BT2165 | BACOVA_03180 |
|  | BT2166 | BACOVA_03179 |
|  | BT2167 | BACOVA_03178 |
|  | BT2168 | BACOVA_03177 |

|    |        |              |
|----|--------|--------------|
| 13 | BT2169 | BACOVA_03176 |
|    | BT2170 | BACOVA_03175 |
|    | BT2171 | BACOVA_03173 |
|    | BT2172 | BACOVA_03172 |
|    | BT2173 | BACOVA_03171 |

|  |        |              |
|--|--------|--------------|
|  | BT2176 | BACOVA_03169 |
|  | BT2177 | BACOVA_03168 |
|  | BT2178 | BACOVA_03166 |
|  | BT2179 | BACOVA_03165 |
|  | BT2180 | BACOVA_03163 |
|  | BT2181 | BACOVA_03162 |
|  | BT2182 | BACOVA_03161 |
|  | BT2183 | BACOVA_03159 |
|  | BT2186 | BACOVA_03157 |
|  | BT2187 | BACOVA_03156 |

|    |        |              |
|----|--------|--------------|
| 14 | BT3086 | BACOVA_02783 |
|    | BT3087 | BACOVA_02784 |
|    | BT3088 | BACOVA_02785 |
|    | BT3089 | BACOVA_02786 |
|    | BT3090 | BACOVA_02787 |
|    | BT3091 | BACOVA_02788 |

|    |        |              |
|----|--------|--------------|
| 15 | BT3309 | BACOVA_00941 |
|    | BT3310 | BACOVA_00942 |
|    | BT3311 | BACOVA_00943 |
|    | BT3312 | BACOVA_00944 |
|    | BT3313 | BACOVA_00945 |
|    | BT3314 | BACOVA_00946 |

|    |        |              |
|----|--------|--------------|
| 16 | BT3328 | BACOVA_01962 |
|    | BT3329 | BACOVA_01963 |
|    | BT3330 | BACOVA_02000 |
|    | BT3331 | BACOVA_01999 |
|    | BT3332 | BACOVA_01998 |
|    | BT3333 | BACOVA_01997 |

|  |        |              |
|--|--------|--------------|
|  | BT3334 | BACOVA_01996 |
|  | BT3335 | BACOVA_01995 |
|  | BT3336 | BACOVA_01994 |
|  | BT3337 | BACOVA_01993 |
|  | BT3339 | BACOVA_01991 |
|  | BT3340 | BACOVA_01990 |

|    |        |              |
|----|--------|--------------|
| 17 | BT3515 | BACOVA_03334 |
|    | BT3516 | BACOVA_03336 |
|    | BT3517 | BACOVA_03337 |
|    | BT3518 | BACOVA_03338 |
|    | BT3519 | BACOVA_03339 |
|    | BT3520 | BACOVA_03340 |
|    | BT3521 | BACOVA_03341 |
|    | BT3522 | BACOVA_03342 |
|    | BT3523 | BACOVA_03343 |
|    | BT3524 | BACOVA_03344 |
|    | BT3526 | BACOVA_03345 |
|    | BT3527 | BACOVA_03346 |
|    | BT3528 | BACOVA_03347 |
|    | BT3529 | BACOVA_03348 |

|    |        |              |
|----|--------|--------------|
|    | BT3554 | BACOVA_03364 |
|    | BT3555 | BACOVA_03365 |
|    | BT3558 | BACOVA_03367 |
|    | BT3559 | BACOVA_03368 |
|    | BT3560 | BACOVA_03369 |
|    | BT3561 | BACOVA_03370 |
|    | BT3562 | BACOVA_03371 |
|    | BT3563 | BACOVA_03373 |
|    | BT3564 | BACOVA_03377 |
|    | BT3565 | BACOVA_03378 |
| 18 | BT3566 | BACOVA_03379 |
|    | BT3567 | BACOVA_03380 |
|    | BT3568 | BACOVA_03381 |
|    | BT3569 | BACOVA_03382 |
|    | BT3570 | BACOVA_02919 |
|    | BT3576 | BACOVA_03384 |
|    | BT3577 | BACOVA_03386 |
|    | BT3578 | BACOVA_03387 |
|    | BT3579 | BACOVA_03388 |
|    | BT3581 | BACOVA_03390 |
|    | BT3582 | BACOVA_03391 |
|    | BT3583 | BACOVA_03392 |
|    | BT3584 | BACOVA_03393 |
|    | BT3585 | BACOVA_03394 |
|    | BT3586 | BACOVA_03395 |

|  |        |              |
|--|--------|--------------|
|  | BT3620 | BACOVA_03455 |
|  | BT3621 | BACOVA_03456 |

|    |        |              |
|----|--------|--------------|
|    | BT3622 | BACOVA_03457 |
|    | BT3623 | BACOVA_03458 |
|    | BT3624 | BACOVA_03459 |
|    | BT3625 | BACOVA_03461 |
|    | BT3626 | BACOVA_03462 |
|    | BT3627 | BACOVA_03463 |
|    | BT3628 | BACOVA_03464 |
|    | BT3629 | BACOVA_03465 |
| 19 | BT3630 | BACOVA_03466 |
|    | BT3631 | BACOVA_03467 |
|    | BT3632 | BACOVA_03468 |
|    | BT3633 | BACOVA_03469 |

|    |        |              |
|----|--------|--------------|
|    | BT3696 | BACOVA_03512 |
|    | BT3697 | BACOVA_03513 |
| 20 | BT3699 | BACOVA_03515 |
|    | BT3700 | BACOVA_03516 |
|    | BT3701 | BACOVA_03517 |
|    | BT3702 | BACOVA_03518 |
|    | BT3703 | BACOVA_03519 |
|    | BT3704 | BACOVA_03520 |
|    | BT3705 | BACOVA_03521 |
|    | BT3708 | BACOVA_03522 |
|    | BT3709 | BACOVA_03523 |
|    | BT3710 | BACOVA_03524 |
|    | BT3711 | BACOVA_03527 |
|    | BT3712 | BACOVA_03528 |
|    | BT3713 | BACOVA_03529 |
|    | BT3714 | BACOVA_03530 |
|    | BT3715 | BACOVA_03531 |
|    | BT3716 | BACOVA_03532 |
|    | BT3717 | BACOVA_03533 |

|    |        |              |
|----|--------|--------------|
| 21 | BT3983 | BACOVA_04804 |
|    | BT3985 | BACOVA_04805 |
|    | BT3986 | BACOVA_04806 |
|    | BT3987 | BACOVA_04807 |
|    | BT3988 | BACOVA_04808 |
|    | BT3990 | BACOVA_04809 |
|    | BT3991 | BACOVA_04810 |
|    | BT3992 | BACOVA_04811 |
|    | BT3993 | BACOVA_04812 |
|    | BT3994 | BACOVA_04813 |
|    | BT3995 | BACOVA_04814 |
|    | BT3996 | BACOVA_04815 |
|    | BT3997 | BACOVA_04816 |
|    | BT3998 | BACOVA_04817 |
|    | BT3999 | BACOVA_04818 |
|    | BT4000 | BACOVA_04819 |
|    | BT4001 | BACOVA_04820 |

|  |        |              |
|--|--------|--------------|
|  | BT4002 | BACOVA_04821 |
|  | BT4003 | BACOVA_04822 |
|  | BT4004 | BACOVA_04823 |

|  |        |              |
|--|--------|--------------|
|  | BT4058 | BACOVA_04853 |
|  | BT4059 | BACOVA_04854 |
|  | BT4060 | BACOVA_04855 |
|  | BT4061 | BACOVA_04856 |
|  | BT4062 | BACOVA_04857 |
|  | BT4063 | BACOVA_04858 |
|  | BT4064 | BACOVA_04859 |
|  | BT4065 | BACOVA_04860 |
|  | BT4066 | BACOVA_04861 |
|  | BT4067 | BACOVA_04862 |

|    |        |              |
|----|--------|--------------|
| 22 | BT4069 | BACOVA_04864 |
|    | BT4070 | BACOVA_04866 |
|    | BT4071 | BACOVA_04867 |
|    | BT4072 | BACOVA_04868 |
|    | BT4073 | BACOVA_04869 |
|    | BT4074 | BACOVA_04870 |
|    | BT4075 | BACOVA_04871 |
|    | BT4076 | BACOVA_04872 |
|    | BT4077 | BACOVA_02057 |
|    | BT4084 | BACOVA_04882 |
|    | BT4085 | BACOVA_04881 |
|    | BT4086 | BACOVA_04880 |
|    | BT4087 | BACOVA_04879 |
|    | BT4088 | BACOVA_04878 |
|    | BT4089 | BACOVA_04877 |
|    | BT4090 | BACOVA_04876 |
|    | BT4091 | BACOVA_02638 |
|    | BT4092 | BACOVA_04883 |
|    | BT4093 | BACOVA_04884 |
|    | BT4094 | BACOVA_04885 |
|    | BT4096 | BACOVA_04886 |

|  |        |              |
|--|--------|--------------|
|  | BT4097 | BACOVA_04887 |
|  | BT4098 | BACOVA_04888 |
|  | BT4099 | BACOVA_04889 |
|  | BT4100 | BACOVA_04890 |
|  | BT4101 | BACOVA_04892 |
|  | BT4102 | BACOVA_04893 |
|  | BT4103 | BACOVA_04894 |
|  | BT4104 | BACOVA_04895 |
|  | BT4105 | BACOVA_04896 |
|  | BT4106 | BACOVA_04897 |
|  | BT4107 | BACOVA_04898 |

|    |        |              |
|----|--------|--------------|
| 23 | BT4108 | BACOVA_04900 |
|    | BT4109 | BACOVA_04901 |
|    | BT4110 | BACOVA_04902 |
|    | BT4111 | BACOVA_04904 |

|  |        |              |
|--|--------|--------------|
|  | BT4112 | BACOVA_03580 |
|  | BT4113 | BACOVA_04922 |
|  | BT4114 | BACOVA_04911 |
|  | BT4115 | BACOVA_04905 |
|  | BT4117 | BACOVA_04913 |
|  | BT4118 | BACOVA_04914 |
|  | BT4120 | BACOVA_04923 |
|  | BT4123 | BACOVA_04926 |
|  | BT4124 | BACOVA_04931 |
|  | BT4125 | BACOVA_04934 |
|  | BT4126 | BACOVA_04935 |
|  | BT4127 | BACOVA_04936 |
|  | BT4128 | BACOVA_04938 |
|  | BT4129 | BACOVA_04939 |
|  | BT4130 | BACOVA_04940 |
|  | BT4131 | BACOVA_04941 |

|    |        |              |
|----|--------|--------------|
| 24 | BT4402 | BACOVA_03554 |
|    | BT4403 | BACOVA_03555 |
|    | BT4404 | BACOVA_03556 |
|    | BT4405 | BACOVA_03557 |
|    | BT4406 | BACOVA_03558 |
|    | BT4407 | BACOVA_03559 |

|    |        |              |
|----|--------|--------------|
|    | BT4468 | BACOVA_05275 |
|    | BT4469 | BACOVA_05276 |
| 25 | BT4470 | BACOVA_05278 |
|    | BT4471 | BACOVA_05279 |
|    | BT4472 | BACOVA_05280 |
|    | BT4473 | BACOVA_05281 |
|    | BT4474 | BACOVA_05282 |
|    | BT4475 | BACOVA_05284 |
|    | BT4476 | BACOVA_05285 |
|    | BT4477 | BACOVA_05286 |
|    | BT4482 | BACOVA_05288 |
|    | BT4483 | BACOVA_05289 |
|    | BT4484 | BACOVA_05290 |
|    | BT4485 | BACOVA_05291 |
|    | BT4486 | BACOVA_05292 |
|    | BT4487 | BACOVA_05293 |

|  |        |              |
|--|--------|--------------|
|  | BT4642 | BACOVA_05456 |
|  | BT4643 | BACOVA_05457 |
|  | BT4644 | BACOVA_05458 |
|  | BT4645 | BACOVA_05459 |
|  | BT4646 | BACOVA_05460 |
|  | BT4647 | BACOVA_05461 |
|  | BT4648 | BACOVA_05462 |
|  | BT4649 | BACOVA_05463 |
|  | BT4650 | BACOVA_05465 |

|    |        |              |
|----|--------|--------------|
|    | BT4651 | BACOVA_05467 |
| 26 | BT4652 | BACOVA_05468 |
|    | BT4653 | BACOVA_05469 |
|    | BT4654 | BACOVA_05470 |
|    | BT4655 | BACOVA_05471 |
|    | BT4656 | BACOVA_05472 |
|    | BT4657 | BACOVA_05473 |
|    | BT4658 | BACOVA_05474 |
|    | BT4659 | BACOVA_05475 |
|    | BT4660 | BACOVA_05476 |
|    | BT4661 | BACOVA_05477 |
|    | BT4662 | BACOVA_05478 |
|    | BT4663 | BACOVA_05479 |
|    | BT4664 | BACOVA_05481 |
|    | BT4665 | BACOVA_05482 |
|    | BT4666 | BACOVA_05483 |
| 27 | BT4667 | BACOVA_05487 |
|    | BT4668 | BACOVA_05488 |
|    | BT4669 | BACOVA_05489 |
|    | BT4670 | BACOVA_05490 |
|    | BT4671 | BACOVA_05491 |
|    | BT4672 | BACOVA_05493 |
|    | BT4673 | BACOVA_05495 |
|    | BT4674 | BACOVA_05496 |
|    | BT4675 | BACOVA_05497 |

|    |        |              |
|----|--------|--------------|
|    | BT4691 | BACOVA_05545 |
|    | BT4696 | BACOVA_05546 |
|    | BT4697 | BACOVA_05547 |
|    | BT4698 | BACOVA_05548 |
|    | BT4699 | BACOVA_05549 |
|    | BT4700 | BACOVA_05550 |
|    | BT4701 | BACOVA_05551 |
|    | BT4702 | BACOVA_05552 |
|    | BT4703 | BACOVA_05554 |
|    | BT4704 | BACOVA_05555 |
| 28 | BT4705 | BACOVA_05556 |
|    | BT4706 | BACOVA_05558 |
|    | BT4707 | BACOVA_05559 |
|    | BT4708 | BACOVA_05560 |
|    | BT4709 | BACOVA_05561 |
|    | BT4710 | BACOVA_05562 |
|    | BT4712 | BACOVA_05564 |
|    | BT4713 | BACOVA_04535 |
|    | BT4714 | BACOVA_05565 |
|    | BT4715 | BACOVA_05566 |
|    | BT4716 | BACOVA_05567 |
|    | BT4718 | BACOVA_05568 |
|    | BT4719 | BACOVA_05569 |
|    | BT4720 | BACOVA_05570 |

BT4721

BACOVA\_05571
