# Supplementary material for: Recognition and Degradation of Plant Cell Wall Polysaccharides by Two Human Gut Symbionts
Source: PLoS Biol. 2011 Dec 20;9(12):e1001221. doi: 10.1371/journal.pbio.1001221 (PMC3243724; doi:10.1371/journal.pbio.1001221)
Supplement: Table S9 — Primers used in this study. Sequences recognized by restriction enzymes used for molecular cloning are underlined. (PDF) [file pbio.1001221.s018.pdf]

**Table S9. Primers used in this study**

Sequences recognized by restriction enzymes used for molecular cloning are underlined

| Name                 | Species   | Sequence(5'-3')                                     |
|----------------------|-----------|-----------------------------------------------------|
| <b>HTCS mutants:</b> |           |                                                     |
| BT0267-1F            | <i>Bt</i> | CCTTGAATTCGTA <u>CTG</u> TTTTTTATTTAATTATTTCCGTGTGC |
| BT0267-1R            | <i>Bt</i> | CCTTGAATTC <u>CC</u> ATTTTAATTTTCCGCAATACAAGTAATTT  |
| BT0366-1F            | <i>Bt</i> | CCTTGAATTCGACCGCTAAATATTACGTATGTGACCATG             |
| BT0366-1R            | <i>Bt</i> | CCTTGAATTCGTAGTTACAGTATCTTTGGAAGTATCCCTTT           |
| BT0958-1F            | <i>Bt</i> | CCTTGAATTC <u>TA</u> CTAACATATTGGAGTAGAGGATGGTTTG   |
| BT0958-1R            | <i>Bt</i> | CCTTGAATTCAACTAACCGTAACTGATGGCATCAGTGA              |
| BT0981-1F            | <i>Bt</i> | CCTTGAATTCACGGTACCTAATTCCGTTCCCTATGATAA             |
| BT0981-1R            | <i>Bt</i> | CCTTGAATTCAAAACACATTATGCTAGAGGCGTAAGTC              |
| BT1183-2F            | <i>Bt</i> | CCTTGAATTCCTAAACCTATCTGGGCTACGGTATCG                |
| BT1183-2R            | <i>Bt</i> | CCTTGAATTCGCCGTTTCGGCTGGAAGTAGA                     |
| BT1635-2F            | <i>Bt</i> | CCTTGAATTC <u>ACT</u> AACTGAAGAAATACATCCATCATGC     |
| BT1635-2R            | <i>Bt</i> | CCTTGAATTCGTCCCGGTAGCTGTAAAAGTAAATTTTG              |
| BT1734-1F            | <i>Bt</i> | CCTTGAATTCCTTAAGCAACCGGTGAGTGTACTACATTCAA           |
| BT1734-1R            | <i>Bt</i> | CCTTGAATTC <u>CA</u> AGTAATGGGAGCCGGTTAATCCTTAA     |
| BT1754-1F            | <i>Bt</i> | CCTTGAATTC <u>CC</u> ATGGTGACATAAGATGAATGATGAGAT    |
| BT1754-1R            | <i>Bt</i> | CCTTGAATTCCTACCGAACGACCGATTTAATAATTATC              |
| BT2391-1F            | <i>Bt</i> | CCTTGAATTC <u>CT</u> GAACTACATTAGTTGAATATGAGTAATGGC |
| BT2391-1R            | <i>Bt</i> | CCTTGAATTC <u>CCC</u> CTGTTATTTACATAGCACTTACAGAAA   |
| BT2628-1F            | <i>Bt</i> | CCTTGAATTC <u>CT</u> ATGCTTAAATTTGAAGCAAGTTGCAGAT   |
| BT2628-1R            | <i>Bt</i> | CCTTGAATTCGCCATGACTATCCTAATTCATAAAGAAGAGTT          |
| BT2860-1F            | <i>Bt</i> | CCTTGAATTC <u>ACT</u> GCTAAGATCATCAGTTAAAGAAAGG     |
| BT2860-1R            | <i>Bt</i> | CCTTGAATTC <u>CC</u> CTGCTTAAATTGTCACCTATTGCTGAT    |
| BT2897-1F            | <i>Bt</i> | CCTTGAATTCGAGGGTTAGGCTTTTCGTTCACTGGATATA            |
| BT2897-1R            | <i>Bt</i> | CCTTGAATTC <u>CT</u> CGATCCCTGTATCTAAATCACTTTACATTA |
| BT2923-1F            | <i>Bt</i> | CCTTGAATTCATTCGTAAGGCTTTATGTGGTTTGGTAC              |
| BT2923-1R            | <i>Bt</i> | CCTTGAATTC <u>CCG</u> CAAACCTTTGTTCTTTTAAGTCTTAACA  |
| BT3049-1F            | <i>Bt</i> | CCTTGAATTCATCCAATGATTGGGAATAGAACAAGGCT              |

|           |           |                                               |
|-----------|-----------|-----------------------------------------------|
| BT3049-1R | <i>Bt</i> | CCTTGAATTCCGGATTTTATTGGTAGACGCTGAAACTT        |
| BT3097-1F | <i>Bt</i> | CCTTGAATTCTATCTTAGGACAGTAAGGGATTTATGTGGT      |
| BT3097-1R | <i>Bt</i> | CCTTGAATTCTATCGTATTAATAGATGCCGTTACTGCA        |
| BT3172-1F | <i>Bt</i> | CCTTGAATTCCGACGGACACTAACTGAAGAGATACAAAC       |
| BT3172-1R | <i>Bt</i> | CCTTGAATTCCATTGAAATATTGAAGGAGTCACAGCGA        |
| BT3302-2F | <i>Bt</i> | CCTTGAATTCTGATATGAGTAGACATAAATGCTTCGTATA      |
| BT3302-2R | <i>Bt</i> | CCTTGAATTCTGTATTTAAAGTCTTTGAAGCTTTGTATGG      |
| BT3334-1F | <i>Bt</i> | CCTTGAATTCCGTTATGACAAAATATTACTTTTCAGCCATTTG   |
| BT3334-1R | <i>Bt</i> | CCTTGAATTCTTTTAGTTGTAGTAGATAGCGTCCACATTG      |
| BT3465-2F | <i>Bt</i> | CCTTGAATTCTATGATGTGCTATACAGGATAGCTATGGATTTA   |
| BT3465-2R | <i>Bt</i> | CCTTGAATTCATCATAAATAAAAAGTCCCTGCCCCAAG        |
| BT3678-1F | <i>Bt</i> | CCTTGAATTCAATAGCATCACTTGTTAGGTTGATGATAATAATAA |
| BT3678-1R | <i>Bt</i> | CCTTGAATTCACTTTATCTGTGGATGGAGATTAAACGAAAT     |
| BT3738-1F | <i>Bt</i> | CCTTGAATTCCTTTATTAGTACATAGGGTTGGAAGACGGTT     |
| BT3738-1R | <i>Bt</i> | CCTTGAATTCCTCAATTAAGGGTGTACATAAGCCAATTC       |
| BT3786-1F | <i>Bt</i> | CCTTGAATTCCTCTGTAGCAGGTTGCTGACAAAGAATAT       |
| BT3786-1R | <i>Bt</i> | CCTTGAATTCGGTGCTATGATTATCCTAATTCATCAAGAAG     |
| BT4111-1F | <i>Bt</i> | CCTTGAATTCATTGAATCAATCGTTTTGATGGCTATAACT      |
| BT4111-1R | <i>Bt</i> | CCTTGAATTCCTGATTACGTCGTATAGTTCTTCTGAGGAAG     |
| BT4124-1F | <i>Bt</i> | CCTTGAATTCGTCAATGACTGAATGTCTCAAGGAATAGTA      |
| BT4124-1R | <i>Bt</i> | CCTTGAATTCGCTTAATTATTCGTTATCATCGTTTCTGC       |
| BT4137-1F | <i>Bt</i> | CCTTGAATTCCTTACTAGAAACAAATCTCATTAAAGGCTGGA    |
| BT4137-1R | <i>Bt</i> | CCTTGAATTCATCTAATTTTCACCTTTCTCATCCGTCT        |
| BT4178-1F | <i>Bt</i> | CCTTGAATTCATTTAACTCCGTTCCAAACAAATGAGAA        |
| BT4178-1R | <i>Bt</i> | CCTTGAATTCCTTAGTCTACAAAACAGGCACGTTGCAAGT      |
| BT4182-1F | <i>Bt</i> | CCTTGAATTCATAATTGAATCCGATATATGTTTCAGGACAG     |
| BT4182-1R | <i>Bt</i> | CCTTGAATTCAGATAGACTAGTCGGATGCAATGATTTT        |
| BT4236-1F | <i>Bt</i> | CCTTGAATTCGCAAATAATTTAAAACGGAGTCGGAAAT        |
| BT4236-1R | <i>Bt</i> | CCTTGAATTCCTTAAGTTACAGCGACCTGTCAAACGTA        |
| BT4663-1F | <i>Bt</i> | CCTTGAATTCGGAATAAATCACATTTTCCTATATTTCCA       |
| BT4663-1R | <i>Bt</i> | CCTTGAATTCCTTCTATTTCATAGAAGAAGTTCTGGAAT       |

|           |           |                                                            |
|-----------|-----------|------------------------------------------------------------|
| BT4673-1F | <i>Bt</i> | <u>gcggtc</u> <u>gactact</u> <u>ttccgtca</u> <u>accgga</u> |
| BT4673-1R | <i>Bt</i> | <u>gcgtctagagagattggaataa</u> <u>actgcagcg</u>             |

# **HTCS periplasmic domain expression:**

|                   |           |                                                   |
|-------------------|-----------|---------------------------------------------------|
| BT0366 NcoF       | <i>Bt</i> | CTCC <u>CATGGG</u> CCAGGAACGGTTTGCCGACCGCTAT      |
| BT0366 XhoR       | <i>Bt</i> | CTCCTCGAGAGTCTTATAGAAATAAGGTACAAT                 |
| Bacova_02097 NheF | <i>Bo</i> | CTC <u>GCTAGC</u> AGTTTTTACCAGCTGGGAGTAAAA        |
| Bacova_02097 XhoR | <i>Bo</i> | CTCCTCGAGGAATGGCGGATACACATTGATGGA                 |
| Bacova_02740 NcoF | <i>Bo</i> | CTCC <u>CATGGG</u> CGAACTGACCAACCGGATGTTTCGAT     |
| Bacova_02740 XhoR | <i>Bo</i> | CTCCTCGAGCTGGCTCACTTTCACTTCTAAGGTGCT              |
| Bacova_04394 NcoF | <i>Bo</i> | CTCC <u>CATGGG</u> CCAGACCGGCAAATTCTATTCAACA      |
| Bacova_04394 XhoR | <i>Bo</i> | CTCCTCGAGGGTCTGGTACCAGGGTGGAGTGAT                 |
| BT3049 NcoF       | <i>Bt</i> | ctcc <u>catggg</u> ctgcccacccttacctcatccaaagattg  |
| BT3049 XhoR       | <i>Bt</i> | ctc <u>ctcgag</u> tgtcagccagagaggagggtgatatgtat   |
| BT4178 NcoF       | <i>Bt</i> | ctcc <u>catggg</u> cggcggcattgaactccgttccaaa      |
| BT4178 XhoR       | <i>Bt</i> | ctc <u>ctcgag</u> gttcgtcttcagaaaggaggcac         |
| BT4182 NheF       | <i>Bt</i> | ctc <u>gctagc</u> tctgtcagatacgttcgaacaaa         |
| BT4182 XhoR       | <i>Bt</i> | ctc <u>ctcgag</u> ggcccaggctcgtctgccagaaagg       |
| BT4673 NcoF       | <i>Bt</i> | ctcc <u>catggg</u> caaaaaagtaaattatcagcaattcgac   |
| BT4673 XhoR       | <i>Bt</i> | ctc <u>ctcgag</u> cgggtggaagaatccggatattcagaatatg |
| Bacova_03437 NheF | <i>Bo</i> | ctc <u>gctagc</u> Caatctcctaagttattcactactgac     |
| Bacova_03437 XhoR | <i>Bo</i> | ctc <u>ctcgag</u> ttaAgcataccatgcaggagatataaagat  |
| Bacova_03441 NcoF | <i>Bo</i> | ctcc <u>catggg</u> cgagaatacattgttctatgattcc      |
| Bacova_03441 XhoR | <i>Bo</i> | ctc <u>ctcgag</u> agacgaacgccaccacggtgc           |

# **qPCR:**

|                |           |                              |
|----------------|-----------|------------------------------|
| Bacova_02096 F | <i>Bo</i> | GCACTTGTTTCGTTTTGATAATTGGCAT |
| Bacova_02096 R | <i>Bo</i> | AAGGGAAATGAAAAGGTGGAATTCAG   |

|                |              |                                 |
|----------------|--------------|---------------------------------|
| Bacova_02652 F | <i>Bo</i>    | ACGGATATAACGTGATAGGCATGTT       |
| Bacova_02652 R | <i>Bo</i>    | TCACACGCTCACCATTTTTATCGAG       |
| Bacova_02742 F | <i>Bo</i>    | TTGGTTTCAAGTCTTTGTTGGGGAT       |
| Bacova_02742 R | <i>Bo</i>    | CCGATCCTTATCAATTGGGACTCG        |
| Bacova_03426 F | <i>Bo</i>    | CCCTTCCATTGAGCTCCAATTG          |
| Bacova_03426 R | <i>Bo</i>    | GCGACGGTGTAATTGATGCTGATGA       |
| Bacova_03428 F | <i>Bo</i>    | CATCTCCATATACTCACGTTCTTTTGC     |
| Bacova_03428 R | <i>Bo</i>    | CGGAACTTTCATACGTGGACTTAGC       |
| Bacova_04393 F | <i>Bo</i>    | ATTGTTTCGCCTGTCTGATTACTCT       |
| Bacova_04393 R | <i>Bo</i>    | ATGAACCGTAATAAAGTAAAATCGCTGGA   |
| BT0362 F       | <i>Bt</i>    | TGTCTACTTCCTTCAGTGACCTCG        |
| BT0362 R       | <i>Bt</i>    | AATCGTGCAGGAAGTGAGTAGC          |
| BT0364 F       | <i>Bt</i>    | GAGAATCAGCAACGAAGCTTTCATGA      |
| BT0364 R       | <i>Bt</i>    | ACTTTGTATACATCGTTACCTACTTCACCA  |
| BT3046 F       | <i>Bt</i>    | CCAATGCACGTTATTATGTAAGTATGGGTAT |
| BT3046 R       | <i>Bt</i>    | ATGTTTACTTACCGACTTATCTTGTTTGAA  |
| BT4164 F       | <i>Bt</i>    | GTTTCATATAGTCTGTTTCCTTTCACGTAGG |
| BT4164 R       | <i>Bt</i>    | GACGAAGCGAAATTCCGTTTTCAG        |
| BT4671 F       | <i>Bt</i>    | ATGGTTTCATCGCCCGAAGAG           |
| BT4671 R       | <i>Bt</i>    | GCGTATGGTTGAGACAGATGTAGG        |
| 16S F          | <i>Bt/Bo</i> | GGTAGTCCACACAGTAAACGATGAA       |
| 16S R          | <i>Bt/Bo</i> | CCCGTCAATTCCTTTGAGTTTC          |
